# Supplementary material for: Chemical generation of checkpoint inhibitory T cell engagers for the treatment of cancer
Source: PubMed Central journal article supplement (PMC10624612; doi:10.1038/s41557-023-01280-4), 2023-07-24
Supplement: 41557_2023_1280_MOESM1_ESM.pdf [file 41557_2023_1280_MOESM1_ESM.pdf]

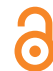

# Chemical generation of checkpoint inhibitory T cell engagers for the treatment of cancer

---

In the format provided by the authors and unedited

1. Table of contents

---

|                                                                                                                              |           |
|------------------------------------------------------------------------------------------------------------------------------|-----------|
| <b>1. Table of contents</b> .....                                                                                            | <b>1</b>  |
| <b>2. Foreword</b> .....                                                                                                     | <b>2</b>  |
| <b>3. Synthesis of BCN-PEG-BCN 2</b> .....                                                                                   | <b>2</b>  |
| <b>4. Generation of protein fragments via enzymatic digestion</b> .....                                                      | <b>2</b>  |
| <b>5. Generation of model Fab<sub>HER2</sub>-Fab<sub>CD3</sub> BiTE 30</b> .....                                             | <b>5</b>  |
| <b>6. Synthesis of a model trispecific antibody, Fab<sub>HER2</sub>-Fab<sub>CD20</sub>-Fab<sub>EGFR</sub> tsAb S33</b> ..... | <b>7</b>  |
| <b>7. Construction of improved bispecific T cell engager three-protein constructs</b> .....                                  | <b>8</b>  |
| <b>8. Experimental Section</b> .....                                                                                         | <b>12</b> |
| 8.2. Synthetic chemistry section .....                                                                                       | 12        |
| 8.3. Chemical biology section .....                                                                                          | 25        |
| 8.4. Cell Biology Section .....                                                                                              | 36        |
| <b>9. NMR spectra</b> .....                                                                                                  | <b>42</b> |
| <b>10. LC-MS spectra</b> .....                                                                                               | <b>58</b> |
| <b>11. References</b> .....                                                                                                  | <b>96</b> |



## 2. Foreword

This document will start by detailing the synthesis of BCN-PEG-BCN **2** molecule, followed by a section on the generation of the Fab modalities required for three-protein assembly. Next, the initial experiments on three-protein assembly will be detailed. These sections were written manuscript-style, however, as they detail proof-of-concept and optimization steps, or starting material-generation steps, it was felt that including them in the manuscript would be detrimental to the cohesion of the paper and increase the length and complexity for not enough tangible benefit. However, the authors believe that there is merit in reporting these steps in detail here as they are either key for the successful reproduction of this work or provide an interesting alternative method for the generation three-protein constructs with chemistry, even if the method reported in the manuscript was found to be superior.

Finally, the experimental section will describe the methods employed for the generation of the data presented here and in the manuscript.

## 3. Synthesis of BCN-PEG-BCN **2**

To aid in the modular generation of three-protein constructs, the synthesis of a BCN-PEG-BCN **2** molecule was carried out by reacting 2.1 eq. BCN-NHS carbonate with a bis-amine PEG in DCM in the presence of base (Scheme 1). After column purification, compound **2** was isolated in 42% yield.

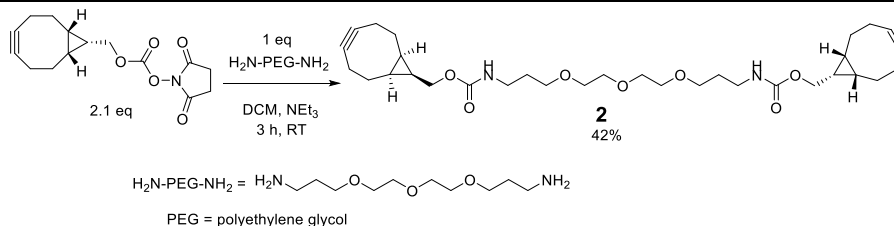

### Scheme 1 | Synthesis of BCN-PEG-BCN.

The synthesis of BCN-PEG-BCN **2**.

## 4. Generation of protein fragments via enzymatic digestion

To be able to assemble multi-protein constructs, the generation of antibody antigen-binding fragment (Fab) building blocks had to be carried out. The commercially available parent monoclonal antibodies (mAbs) were subjected to enzymatic digestion, usually *via* the papaya cysteine protease, papain. The generation of these Fabs will be detailed in the sections below.

An anti-EGFR mAb (Cetuximab), an anti-PD-1 mAb, an anti-human ICOS mAb and an anti-CTLA-4 mAb were digested to the corresponding Fab<sub>EGFR</sub> **S17**, Fab<sub>PD-1</sub> **7**, Fab<sub>ICOS</sub> **S20** and Fab<sub>CTLA-4</sub> **S19**, respectively, *via* the standard antibody digestion protocol (Figure 1/A) and after protein A purification the purities were confirmed by SDS-PAGE (Figure 1/D,H) and LC-MS (Figure 1/J,N-P). The digestion of an anti-PD-L1 mAb

was also carried out, but the resulting Fab<sub>PD-1</sub> and Fc<sub>PD-1</sub> species could not be separated *via* protein A, protein A/G or protein L purification (data not shown).

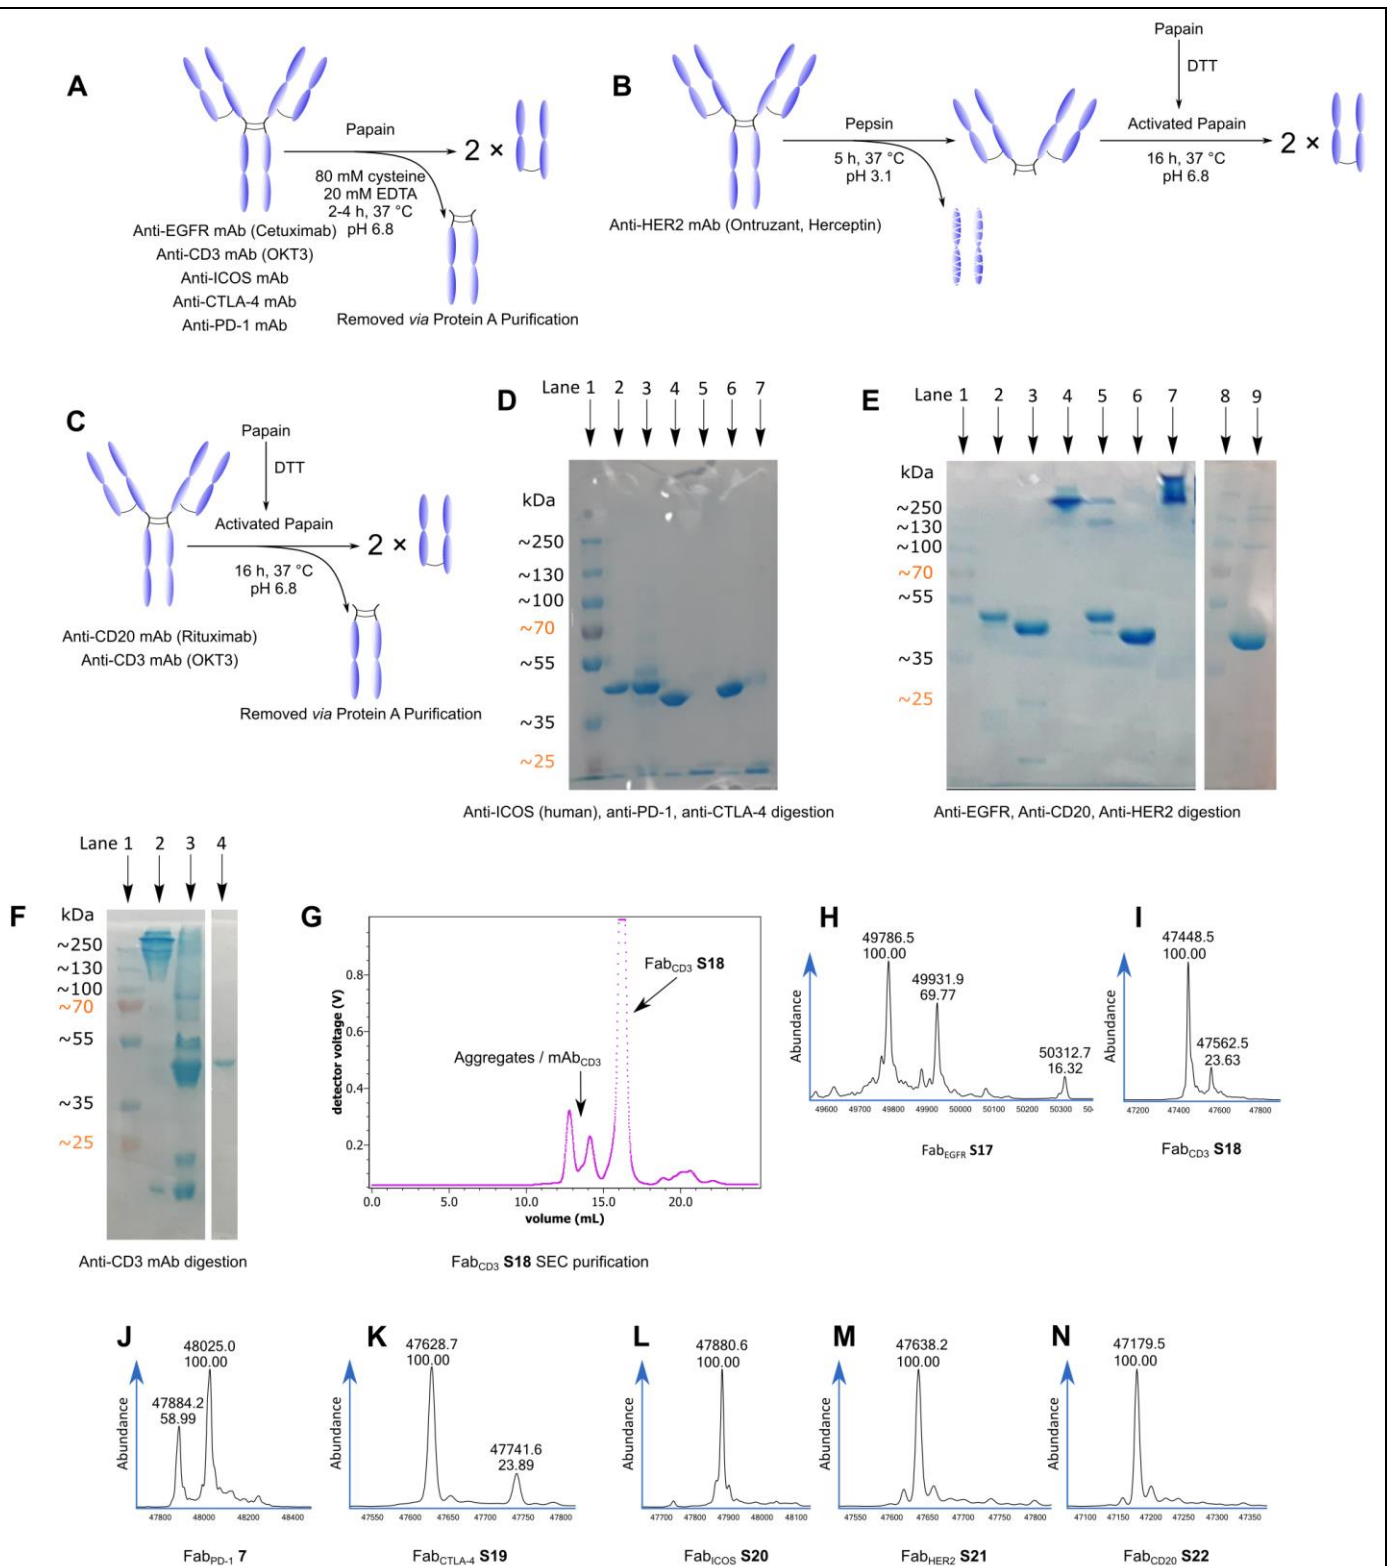

**Figure 1 | Enzymatic digestion of monoclonal antibodies (mAbs) to their corresponding fragments antigen binding (Fabs).**

**A** | Standard mAb digestion protocol used in the case of anti-EGFR mAb (Cetuximab), anti-CD3 mAb (OKT3), anti-human ICOS mAb, anti-CTLA-4 mAb, anti-PD-1 mAb. Papain, activated with 80 mM cysteine *in situ*, was used to generate Fab and Fc fragments of the parent mAb. These were then separated by

protein A purification. **B** | Digestion protocol used in the case of anti-CD20 mAb (Rituximab) and initially in the case of anti-CD3 mAb (OKT3). Subsequently the protocol outlined in Figure 1/A was used for anti-CD3 digestion. Papain, pre-activated with 10 mM DTT, was used to generate Fab and Fc fragments of the parent mAb. These were then separated by protein A purification. **C** | Protocol used for digestion of anti-HER2 mAb (Trastuzumab, Herceptin, Ontruzant). The Fc fragment was removed by pepsin digestion as the Fab of Trastuzumab binds protein A, thus making it impossible to separate the Fab and Fc that way. After the generation of F(ab')<sub>2</sub> fragments, pre-activated papain (with DTT) was used to remove the hinge region and furnish clean Fab<sub>HER2</sub> **S21**. **D** | SDS-PAGE of Fab<sub>ICOS</sub> **S20**, Fab<sub>PD-1</sub> **7**, and Fab<sub>CTLA-4</sub> **S19** digestion. Lane 1: Ladder. Lane 2: Fab<sub>ICOS</sub> **S20**. Lane 3: F<sub>ICOS</sub>. Lane 4: Fab<sub>PD-1</sub> **7**. Lane 5: F<sub>PD-1</sub>. Lane 6: Fab<sub>CTLA-4</sub> **S19**. Lane 7: F<sub>CTLA-4</sub>. **E** | SDS-PAGE of Fab<sub>HER2</sub> **S21**, Fab<sub>CD20</sub> **S22**, Fab<sub>EGFR</sub> **S17** digestion. Lane 1 & 8: Ladder. Lane 2: F<sub>EGFR</sub>. Lane 3: Fab<sub>EGFR</sub> **S17**. Lane 4: mAb<sub>EGFR</sub> (Cetuximab). Lane 5: F<sub>CD20</sub> **S23**. Lane 6: Fab<sub>CD20</sub> **S22**. Lane 7: mAb<sub>CD20</sub> (Rituximab). Lane 9: Fab<sub>HER2</sub> **S21**. Lanes 1-7 are from a different gel from lanes 8 & 9. **F** | SDS-PAGE of digestion and purification of Fab<sub>CD3</sub> **S18**. SEC purification afforded clean Fab<sub>CD3</sub> **S18**. Lane 1: Ladder. Lane 2: mAb<sub>CD3</sub>. Lane 3: Crude digested mAb<sub>CD3</sub> (OKT3). Lane 4: SEC purified Fab<sub>CD3</sub> **S18**. All lanes are from the same gel, with irrelevant lanes removed from in between lanes 3 & 4. **G** | SEC UV trace of purification of Fab<sub>CD3</sub> **S18**. **H** | LC-MS analysis of Fab<sub>EGFR</sub> **S17**. Expected mass: 49788 and 49933 Da (glycoforms). Observed Mass: 49786 and 49933 Da ( $\Delta = 147$  Da, Fucose). **I** | LC-MS analysis of Fab<sub>CD3</sub> **S18**. Observed mass: 47449 Da and 47563 Da ( $\Delta = 114$  Da, Asn). **J** | LC-MS analysis of Fab<sub>PD-1</sub> **7**. Observed mass: 47884 Da and 48025 Da ( $\Delta = 141$  Da, His/Phe). **K** | LC-MS analysis of Fab<sub>CTLA-4</sub> **S19**. Observed mass: 47629 Da and 47742 Da ( $\Delta = 113$  Da, Ile/Leu). **L** | LC-MS analysis of Fab<sub>ICOS</sub> **S20**. Observed mass: 47881 Da. **M** | LC-MS analysis of Fab<sub>HER2</sub> **S21**. Expected mass: 47638 Da. Observed mass: 47639 Da. **N** | LC-MS analysis of Fab<sub>CD20</sub> **S22**. Expected mass: 47181 Da. Observed mass: 47180 Da. | **Relevant amino acid residue masses.** | Isoleucine/Leucine: 113.08 Da, Asparagine: 114.04 Da, Aspartic acid: 115.02 Da, Histidine: 137.06 Da, Phenylalanine: 147.07 Da. **Relevant glycan residue masses.** | Fucose: 146.06 Da. | Generation of most Fabs was carried out at least 2-3 times yielding similar results.

Anti-HER2 mAb (Herceptin or Ontruzant) was pre-digested with pepsin to remove the Fc region and then digested with pre-activated immobilized papain (with DTT) to afford the Fab fragment (Fab<sub>HER2</sub> **S21**) in 32% yield, according to a previously published protocol (Figure 1/B).<sup>1</sup> This was necessary, as protein A binds to Fab<sub>HER2</sub> **S21** in addition to F<sub>HER2</sub>. Anti-CD20 mAb (Rituximab) was digested with pre-activated immobilized papain (with DTT) and then then purified with a protein A column, to yield anti-CD20 Fab (Fab<sub>CD20</sub> **S22**) and anti-CD20 Fc (F<sub>CD20</sub> **S23**, Figure 1/C). The purity of the Fabs and F<sub>CD20</sub> **S23** was confirmed by SDS-PAGE (Figure 1/H) and LC-MS (Figure 1/Q-S).

Anti-CD mAb (OKT3) antibody was initially digested as mAb<sub>CD20</sub> was with pre-activated papain, except the reaction was allowed to progress over 30 h (Figure 1/C), and instead of protein A purification, SEC purification was used (Figure 1/I). The purity of Fab<sub>CD3</sub> **S18** was confirmed by SDS-PAGE (Figure 1/G) and LC-MS (Figure 1/M). Later the digestion was also repeated with the standard digestion protocol followed by protein A purification and was shown to yield similar results, over a shorter timeframe, thus for future digestions this protocol was used (Figure 1/A).

## 5. Generation of model Fab<sub>HER2</sub>-Fab<sub>CD3</sub> BiTE **30**

With the Fabs having now been produced, and the small molecules necessary already available from previous work,<sup>2-4</sup> the synthesis of a model BiTE was attempted from Fab<sub>HER2</sub> **S21** and Fab<sub>CD3</sub> **S18**. This would be the 1<sup>st</sup> BiTE prepared via the pyridazinedione (PD) method and would also serve as a suitable control for the three-protein CiTEs. Fab<sub>HER2</sub> **S21** and Fab<sub>CD3</sub> **S18** were reduced with TCEP, 20 and 60 eq., respectively, over 2 h at pH 8, 37 °C. After removal of excess TCEP (ultrafiltration), Br<sub>2</sub>PD-BCN **3** was added to the reduced Fab<sub>HER2</sub> **S21** solution and Br<sub>2</sub>PD-Tet **S9** to the reduced Fab<sub>CD3</sub> **S18** solution. The reaction was carried out over 90 min at pH 8, 37 °C (Figure 2/A). After removal of small molecule (ultrafiltration), the PD-modified, click-enabled Fab<sub>HER2</sub>-BCN **10** and Fab<sub>CD3</sub>-Tet **S29** were acquired. These were then reacted with each other in a 1:1.2 ratio (Figure 2/C) in acetate buffer (pH = 5) over 16 h at 30 °C. SDS-PAGE showed formation of a band of the expected size (Figure 2/D). N.B., antibody species consistently migrate slower on SDS-PAGE gels than the ladder would indicate, thus the band appearing at ~130 kDa according to the ladder, is actually the bsAb, which is ~97 kDa. Similarly, mAbs usually appear at ~250 kDa. Presumably this is due to incomplete denaturation, perhaps as a result of the disulfide bonds keeping the structure intact to some degree. SEC purification was then carried out to furnish clean Fab<sub>HER2</sub>-Fab<sub>CD3</sub> BiTE **30** (Figure 2/E) as confirmed by LC-MS analysis (Figure 2/F).



**A** | Method for modifying Fabs with dibromo pyridazinediones (Br<sub>2</sub>PDs). The Fab is reduced with TCEP (20-60 eq.). After removal of excess TCEP the Br<sub>2</sub>PD is added (5-20 eq.) to form the Fab-PD conjugate. This way different click handles, or combinations thereof can be installed on the protein (e.g., bicyclononyne (BCN), tetrazine, or tetrazine and azide both).<sup>2,3</sup> **B** | The PDs used for the generation of bispecific and trispecific antibodies; Br<sub>2</sub>PD-Tet **4**, Br<sub>2</sub>PD-BCN **3**, and Br<sub>2</sub>PD-Tet-N<sub>3</sub> **1**. **C** | Method for generating Fab<sub>HER2</sub>-Fab<sub>CD3</sub> **30** with PDs. Fab<sub>HER2</sub>-BCN **10** and Fab<sub>CD3</sub>-Tet **S29** are reacted with each other in a 1:1.2 ratio to form Fab<sub>HER2</sub>-Fab<sub>CD3</sub> **30** after SEC purification. **D** | SDS-PAGE of formation of Fab<sub>HER2</sub>-Fab<sub>CD3</sub> BiTE **30**. **Lane 1**: Ladder. **Lane 2**: Crude Fab<sub>HER2</sub>-Fab<sub>CD3</sub> BiTE **30**. Both lanes are from the same gel, with irrelevant lanes removed from in between lanes 1 & 2. **E** | UV trace of SEC purification of Fab<sub>HER2</sub>-Fab<sub>CD3</sub> BiTE **30**. **F** | LC-MS analysis of Fab<sub>HER2</sub>-Fab<sub>CD3</sub> BiTE **30**. Expected mass: 96256 Da. Observed mass: 96261 Da. **G** | Method for generating trispecific antibodies with PDs. Fab<sub>HER2</sub>-BCN **10** and Fab<sub>CD20</sub>-Tet-N<sub>3</sub> **19** were reacted with each other in a 1:1.4 ratio to form Fab<sub>HER2</sub>-Fab<sub>CD20</sub>-N<sub>3</sub> **22**. This was purified by protein A purification and subsequently reacted with Br<sub>2</sub>PD-BCN **3** to form Fab<sub>HER2</sub>-Fab<sub>CD20</sub>-PDBr<sub>2</sub> **S32**. To this was then added reduced Fab<sub>EGFR</sub> **S17** to generate Fab<sub>HER2</sub>-Fab<sub>CD20</sub>-Fab<sub>EGFR</sub> **S33** after SEC purification. **H** | SDS-PAGE of formation of Fab<sub>HER2</sub>-Fab<sub>CD20</sub>-Fab<sub>EGFR</sub> trispecific antibody (tsAb) **S33**. **Lanes 1 & 7**: Ladder. **Lane 2**: Fab<sub>CD20</sub> **S22**. **Lane 3**: Fab<sub>HER2</sub> **S21**. **Lane 4**: Crude Fab<sub>HER2</sub>-Fab<sub>CD20</sub>-N<sub>3</sub> bsAb **22**. **Lane 5**: Fab<sub>CD20</sub>-Tet-N<sub>3</sub> **19** recovered after protein A purification. **Lane 6**: Purified Fab<sub>HER2</sub>-Fab<sub>CD20</sub>-N<sub>3</sub> bsAb **22**. **Lane 8**: Fab<sub>HER2</sub>-Fab<sub>CD20</sub>-PDBr<sub>2</sub> bsAb **S32**. **Lane 9**: Crude Fab<sub>HER2</sub>-Fab<sub>CD20</sub>-Fab<sub>EGFR</sub> tsAb **S33**. **Lane 10**: Reduced Fab<sub>EGFR</sub> **S17**. **Lane 11**: Fab<sub>EGFR</sub> **S17**. **I** | UV trace of SEC purification of Fab<sub>HER2</sub>-Fab<sub>CD20</sub>-Fab<sub>EGFR</sub> tsAb **S33**. **J** | LC MS analysis of Fab<sub>HER2</sub>-BCN **10**. Expected mass: 48140 Da. Observed mass: 48141 Da. **K** | LC-MS analysis of Fab<sub>CD20</sub>-Tet-N<sub>3</sub> **19**. Expected mass: 48816 Da. Observed: 48115 Da. **L** | LC-MS analysis of Fab<sub>EGFR</sub> **S17**. Expected mass: 49788 and 49933 Da (glycoforms). Observed mass: 49786 and 49933 Da ( $\Delta = 147$  Da, Fucose). **M** | LC-MS analysis of Fab<sub>HER2</sub>-Fab<sub>CD20</sub>-N<sub>3</sub> bsAb **22**. Expected mass: 96229 Da. Observed mass: 96234 Da. **N** | LC-MS analysis of Fab<sub>HER2</sub>-Fab<sub>CD20</sub>-PDBr<sub>2</sub> bsAb **S32**. Expected mass: 96891 Da. Observed mass: 96870 Da and 96234 Da (Fab<sub>HER2</sub>-Fab<sub>CD20</sub>-N<sub>3</sub> **22** starting material). **O** | LC-MS analysis of Fab<sub>HER2</sub>-Fab<sub>CD20</sub>-Fab<sub>EGFR</sub> tsAb **S33**. Expected mass: 146512 Da and 146659 Da. Observed mass: 146530 Da and 146677 Da. | Generation of most Fab conjugates was carried out 2-3 times yielding similar results. Each protein-protein construct was generated a single time unless otherwise stated.

## 6. Synthesis of a model trispecific antibody, Fab<sub>HER2</sub>-Fab<sub>CD20</sub>-Fab<sub>EGFR</sub> tsAb **S33**

Next the formation of a trispecific antibody, as a model three-protein construct, was attempted. First, Fab<sub>HER2</sub>-BCN **10** and Fab<sub>CD20</sub>-Tet-N<sub>3</sub> **19** were prepared. These were then combined in a 1:1.4 (Fab<sub>HER2</sub>:Fab<sub>CD20</sub>) ratio and incubated for 16 h at 22 °C and pH 5. The crude product was then purified by protein A to remove excess Fab<sub>CD20</sub> **S22**, as Fab<sub>HER2</sub> **S21** binds protein A, while Fab<sub>CD20</sub> **S22** does not. The purity of the resulting Fab<sub>HER2</sub>-Fab<sub>CD20</sub>-N<sub>3</sub> **13** was confirmed by LC-MS (Figure 2/M). Next, 10 eq. of Br<sub>2</sub>PD-BCN **3** was added to click to Fab<sub>HER2</sub>-Fab<sub>CD20</sub>-N<sub>3</sub> **13** to prepare Fab<sub>HER2</sub>-Fab<sub>CD20</sub>-PDBr<sub>2</sub> **S32** over 4 h at pH 8. After this time, the excess small molecule was removed, and the resulting construct analysed by LC-MS (Figure 2/N). Reduced Fab<sub>EGFR</sub> **S17** was then added, and the reaction incubated at 37 °C, pH 8 overnight to yield crude Fab<sub>HER2</sub>-Fab<sub>CD20</sub>-Fab<sub>EGFR</sub> trispecific antibody (tsAb) **S33** (Figure 2/G). Formation of a ~150 kDa species was confirmed by SDS-PAGE (Figure 2/H). This was then subjected to SEC purification (Figure 2/I)

to yield purified Fab<sub>HER2</sub>-Fab<sub>CD20</sub>-Fab<sub>EGFR</sub> tsAb **S33**, the mass of which was confirmed by LC-MS analysis (Figure 2/O).

## 7. Construction of improved bispecific T cell engager three-protein constructs

With a method for the generation of a trispecific antibody (tsAb) in hand, it was decided to try and synthesize a more therapeutically relevant set of molecules. To this end, a bispecific T cell engager (BiTE)<sup>5</sup> platform comprised of the Fab arm of an anti-CD3 antibody (clone: OKT3, for engaging and activating T cells) **S18** and the Fab arm of an anti-HER2 antibody (Trastuzumab, for directing the immune cells to the cancer target) **S21** was generated with an azide functionality available for further attachment. To this bsAb, initially the attachment of the enzyme *Salmonella typhimurium* Sialidase (ST Sia) **6**, and later of an anti-PD-1 Fab **7** was attempted, to generate checkpoint inhibitory T cell-engagers (CiTEs). Sialidase removes sialic acid from the surface of cancer and immune cells, removing an immune checkpoint, leading to increased T cell activation,<sup>6,7</sup> and hopefully improved BiTE efficacy. Similarly, an anti-PD-1 Fab would block the PD-1/PD-L1 immune checkpoint thus acting as a checkpoint-inhibitor, hopefully leading to increased target cell-killing.<sup>8</sup> The generation of these three-protein conjugate CiTEs along with suitable controls will be detailed in the following sections.

Fab<sub>CD3</sub> **S18** and ST Sia **6** were reduced with TCEP (20 eq., 2 h) and reacted with Br<sub>2</sub>PD-BCN **3** (10 eq., 90 min). Both reactions proceeded well as analysed by SDS-PAGE (Figure 3/C) and LC-MS data showed clean conversion of both sialidase **6** and Fab<sub>CD3</sub> **S18** to their respective conjugates Sia-BCN **S28** and Fab<sub>CD3</sub>-BCN **S30** (Figure 3/D, E).

With these encouraging results in hand, the generation of a Fab<sub>CD20</sub>-Fab<sub>HER2</sub>-sialidase construct **S37** was attempted as a test reaction (and future negative control) for a Fab<sub>CD3</sub>-Fab<sub>HER2</sub>-sialidase construct *via* a modified protocol of the trispecific generation detailed before (Figure 3/A). Fab<sub>HER2</sub>-Tet-N<sub>3</sub> **15** and Fab<sub>CD20</sub>-BCN **S25** were prepared and reacted with each other at pH 5 overnight to produce Fab<sub>CD20</sub>-Fab<sub>HER2</sub>-N<sub>3</sub> bispecific antibody **S31**. This was then reacted with Br<sub>2</sub>PD-BCN **3** and after removal of small molecules, with sialidase (pre-reduced with TCEP) at pH 8 overnight. After the reaction was shown to have not gone to completion, a further 1 eq. of Br<sub>2</sub>PD-BCN **3** was added and the reaction incubated overnight once more, and then SDS-PAGE analysis was performed and suggested formation of the final construct (Figure 3/I).

After this time, the mixture was purified by SEC. The excess sialidase **6**, left-over Fab and Fab<sub>CD20</sub>-Fab<sub>HER2</sub>-N<sub>3</sub> bispecific antibody **S31** separated well from the larger constructs, but unfortunately among the larger species separation was not very good (SDS-PAGE: Figure 3/J, SEC UV trace: Figure 3/K). Nonetheless, LC-MS analysis of the largest fraction showed the expected mass of Fab<sub>CD20</sub>-Fab<sub>HER2</sub>-Sia<sub>2</sub> **S36**, although due to a combination of low concentration and the construct not ionising well on the MS, the data was rather noisy (Figure 3/L).



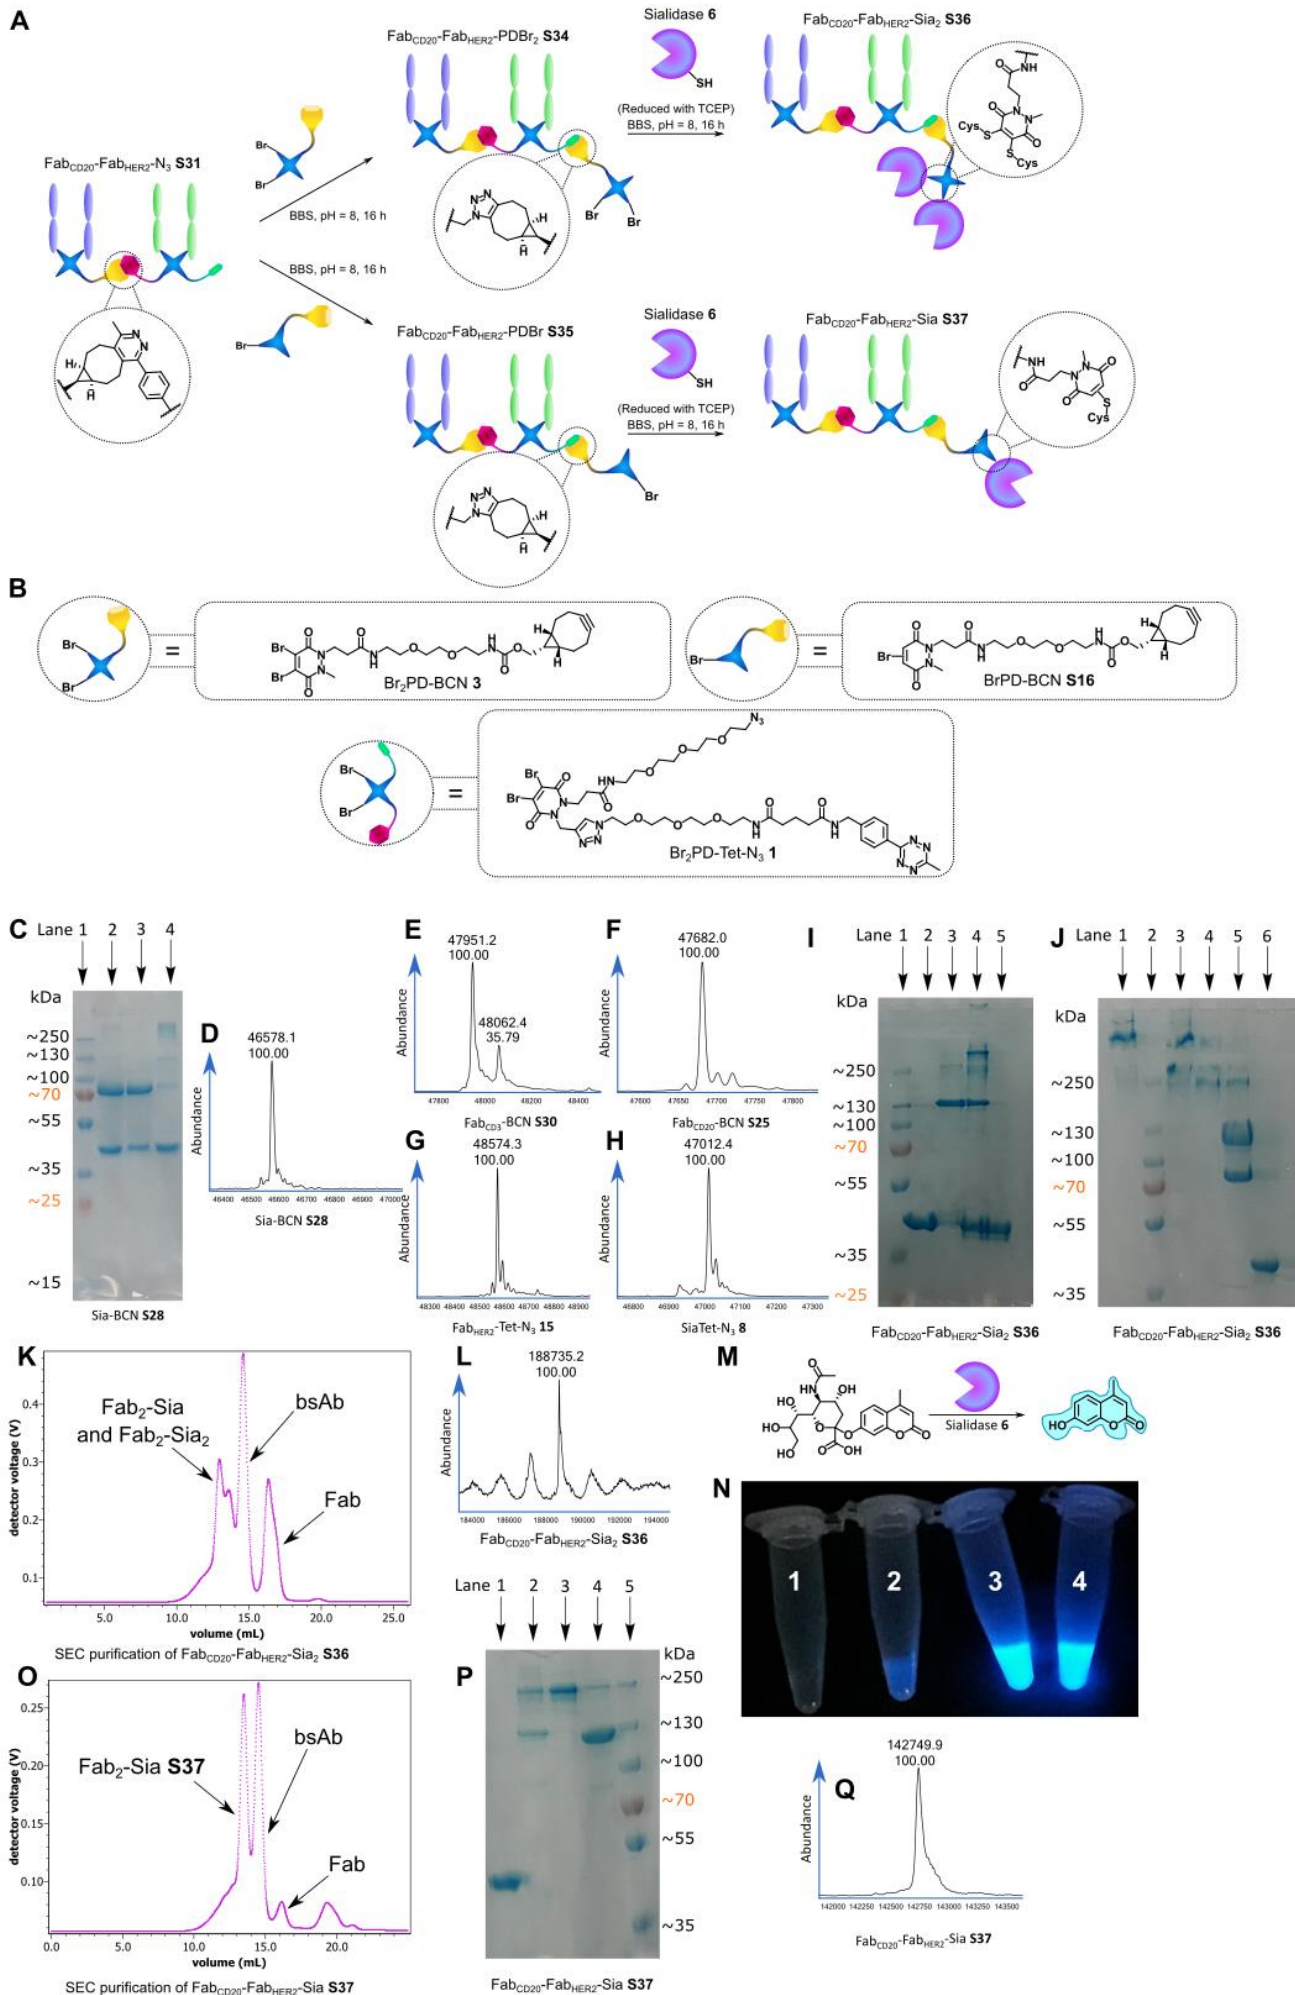



### Figure 3 | Initial experiments towards generating a Fab<sub>x</sub>-Fab<sub>y</sub>-Sialidase conjugate.

**A** | Initial strategies for generating Fab<sub>CD20</sub>-Fab<sub>HER2</sub>-(Sia)<sub>n</sub> conjugates. A Fab<sub>CD20</sub>-Fab<sub>HER2</sub>-N<sub>3</sub> bsAb **S31** was generated as before (see Figure 2/G-O, albeit with the positions of Fab<sub>CD20</sub> **S22** and Fab<sub>HER2</sub> **S21** in the construct swapped). This bsAb was then reacted with either Br<sub>2</sub>PD-BCN **3** as before (see Figure 2/G-O) or with BrPD-BCN **S16**. The resulting Fab<sub>CD20</sub>-Fab<sub>HER2</sub>-PDBr<sub>2</sub> **S34** or Fab<sub>CD20</sub>-Fab<sub>HER2</sub>-PDBr **S35** was then reacted with reduced *Salmonella typhimurium* Sialidase enzyme cysteine mutant **6** (ST Sia) to generate Fab<sub>CD20</sub>-Fab<sub>HER2</sub>-Sia<sub>2</sub> **S36** or Fab<sub>CD20</sub>-Fab<sub>HER2</sub>-Sia **S37**, respectively. **B** | The PDs used for the modification of sialidase and the initial attempts at the construction of a Fab<sub>CD20</sub>-Fab<sub>HER2</sub>-(Sia)<sub>n</sub> conjugates; Br<sub>2</sub>PD-BCN **3**, Br<sub>2</sub>PD-Tet-N<sub>3</sub> **1** and BrPD-BCN6 **S16**. **C** | SDS-PAGE of reaction of sialidase with Br<sub>2</sub>PD-BCN **3**. **Lane 1**: Ladder. **Lane 2**: Native ST sialidase **6**. **Lane 3**: Native sialidase **6** + Br<sub>2</sub>PD-BCN **3**. **Lane 4**: Reduced sialidase **6** (via TCEP) + Br<sub>2</sub>PD-BCN **3**. **D** | LC-MS analysis of Sia-BCN **S28**. Expected mass: 46578 Da. Observed mass: 46578 Da. **E** | LC-MS analysis of Fab<sub>CD3</sub>-BCN **S30**. Expected mass: 47948 Da. Observed mass: 47951 Da. **F** | LC-MS analysis of Fab<sub>CD20</sub>-BCN **S25**. Expected mass: 47683 Da. Observed mass: 47682 Da. **G** | LC-MS analysis of Fab<sub>HER2</sub>-Tet-N<sub>3</sub> **15**. Expected mass: 48574 Da. Observed mass: 48574 Da. **H** | LC-MS analysis of Sia-Tet-N<sub>3</sub> **8**. Expected mass: 47012 Da. Observed mass: 47012 Da. **I** | SDS-PAGE of Fab<sub>CD20</sub>-Fab<sub>HER2</sub>-Sia<sub>2</sub> **S36** formation. **Lane 1**: Ladder. **Lane 2**: Fab<sub>HER2</sub> **S21**. **Lane 3**: Fab<sub>CD20</sub>-Fab<sub>HER2</sub>-PDBr<sub>2</sub> **S34**. **Lane 4**: Fab<sub>CD20</sub>-Fab<sub>HER2</sub>-Sia<sub>2</sub> **S36**. **Lane 5**: Reduced sialidase **6**. **J** | SDS-PAGE after SEC purification of Fab<sub>CD20</sub>-Fab<sub>HER2</sub>-Sia<sub>2</sub> **S36**. **Lane 1**: Largest fraction + TCEP. **Lane 2**: Ladder. **Lane 3**: Largest fraction, Fab<sub>CD20</sub>-Fab<sub>HER2</sub>-Sia<sub>2</sub> **S36**. **Lane 4**: Fab<sub>CD20</sub>-Fab<sub>HER2</sub>-Sia. **Lane 5**: Fab<sub>CD20</sub>-Fab<sub>HER2</sub>-N<sub>3</sub> **S31** and sialidase dimer. **Lane 6**: Excess sialidase **6**. **K** | SEC UV-trace of Fab<sub>CD20</sub>-Fab<sub>HER2</sub>-Sia<sub>2</sub> **S36** formation reaction. **L** | LC-MS analysis of Fab<sub>CD20</sub>-Fab<sub>HER2</sub>-Sia<sub>2</sub> **S36**. Expected mass: 188720 Da. Observed mass: 188735 Da. **M** | The 4-methylumbelliferyl N-acetyl- $\alpha$ -D-neuraminic acid (MUNANA) assay to assess sialidase **6** activity. The enzymatic activity of sialidase **6** cleaves MUNANA and releases fluorescent 4-methylumbelliferone. **N** | The MUNANA assay carried out on Fab<sub>CD20</sub>-Fab<sub>HER2</sub>-Sia<sub>2</sub> **S36**. Eppendorf vials were photographed under a UV lamp (365 nm). **Vial 1**: PBS. **Vial 2**: A solution of MUNANA in PBS. **Vial 3**: A solution of MUNANA and ST sialidase **6** in PBS. **Vial 4**: A solution of MUNANA and Fab<sub>CD20</sub>-Fab<sub>HER2</sub>-Sia<sub>2</sub> **S36** in PBS. **O** | SEC UV-trace of Fab<sub>CD20</sub>-Fab<sub>HER2</sub>-Sia **S37** formation reaction. **P** | SDS-PAGE of SEC purified Fab<sub>CD20</sub>-Fab<sub>HER2</sub>-Sia **S37**. **Lane 1**: Fab<sub>HER2</sub> **S21**. **Lane 2**: Crude Fab<sub>CD20</sub>-Fab<sub>HER2</sub>-Sia **S37**. **Lane 3**: Purified Fab<sub>CD20</sub>-Fab<sub>HER2</sub>-Sia **S37**. **Lane 4**: Recovered Fab<sub>CD20</sub>-Fab<sub>HER2</sub>-PDBr **S35**. **Lane 5**: Ladder. **Q** | LC-MS analysis of Fab<sub>CD20</sub>-Fab<sub>HER2</sub>-Sia **S37**. Expected mass: 142725 Da. Observed mass: 142750 Da. | Generation of most Fab conjugates have been carried out 2-3 times yielding similar results. Each protein-protein construct was generated a single time unless otherwise stated.

With Fab<sub>CD20</sub>-Fab<sub>HER2</sub>-Sia<sub>2</sub> **S36** obtained, the impact of the procedure on the activity of the enzyme was tested with a MUNANA assay. MUNANA contains a 4-methylumbelliferone moiety masked by a glycan that sialidase can cleave off releasing the UV-active chromophore (Figure 3/M). By eye, no difference in fluorescence intensity could be observed when adding MUNANA to Fab<sub>CD20</sub>-Fab<sub>HER2</sub>-Sia<sub>2</sub> **S36** or an equivalent concentration of sialidase, whilst the controls, MUNANA in PBS or just PBS alone, showed markedly less or no fluorescence, respectively (Figure 3/N). Of course, this experiment was no substitute for a quantitative assay, but it did suggest that the enzyme retained (at least some of) its biological activity.

As mentioned above, separation between larger species was difficult, and furthermore it was hypothesized that having an additional sialidase on the construct would not improve efficacy but might increase off-target effects. To address these issues a new synthesis was attempted where instead of Br<sub>2</sub>PD-BCN **3**, BrPD-BCN **S16** was clicked to bsAb-N<sub>3</sub> to make diaddition of sialidase **6** mechanistically impossible (Figure 3/A). To further ease purification, after generation of bsAb-PDBr, the construct was subjected to protein A purification (to remove excess Fab<sub>CD20</sub> **S22** which would not be bound), but instead of eluting the construct, subsequent reaction steps were performed with the construct bound to the protein A resin. Thus, after sialidase **6** addition and incubation, unreacted sialidase **6** could just be washed from the column before the final construct was eluted under acidic conditions. This strategy showed a marked improvement in both conversion of the bsAb to the final construct (as only the Fab<sub>CD20</sub>-Fab<sub>HER2</sub>-Sia **S37** was produced), and in the ease of SEC purification (Figure 3/O). SDS-PAGE (Figure 3/P) and LC-MS (Figure 3/Q) analysis confirmed the purity of the product.

Unfortunately, it was found that these results were hard to reproduce, due to issues with side-reactions and purification. The postulated side-reactions include an internal lysine on the bsAb-PDBr displacing the bromine atom on the PD and thus competing with reduced sialidase **6** (Sia-SH) addition, as evidenced by the loss of a Br-mass bsAb-PDBr (data not shown), from re-oxidation of Sia-SH **6** to Sia-S-Sia, and background reaction between the PD portion of Fab<sub>CD20</sub>-Fab<sub>HER2</sub>-PDBr **S35** and TCEP (in case it was added to limit Sia-SH **6** re-oxidation). The low conversion (<50%) probably arising due to these side-reactions limited the efficiency of purification leading to low yields after SEC. To circumvent these issues, a more elegant method was proposed as detailed in the main text along with suitable biological tests of the generated constructs.

## 8. Experimental Section

### 8.2. Synthetic chemistry section

#### 8.2.1. General experimental details for synthetic chemistry

Chemicals were purchased from Sigma-Aldrich, Santa Cruz Biotechnology, or AlfaAesar, and were used as received unless otherwise stated. Solvents were used as supplied. Where described below, petrol refers to petroleum ether (b.p. 40-60 °C). All reactions were monitored by thin-layer chromatography (TLC) on pre-coated silica gel plates. Flash column chromatography was carried out with either pre-loaded Biotage® SNAP column chromatography cartridges or pre-loaded GraceResolv™ flash cartridges on a Biotage® Isolera Spektra One flash chromatography system. All reaction mixtures were stirred magnetically unless stated otherwise. All reactions involving moisture sensitive compounds or procedures were carried out in flame-dried flask under an atmosphere of argon. Room temperature (RT) is defined as 16-23 °C. Reactions at 0 °C were cooled with an ice/water bath. Removal of solvent and concentration *in vacuo* was carried out on a Büchi rotary evaporator followed by evaporation under high vacuum.

<sup>1</sup>H NMR spectra were obtained at 400, 500, 600 or 700 MHz. <sup>13</sup>C NMR spectra were obtained at 100, 125, 150 or 175 MHz. All results were obtained using Bruker NMR instruments, the models are as follows: Avance Neo 700, Avance III 600, Avance 500, Avance III 400. The chemical shifts ( $\delta$ ) for <sup>1</sup>H and <sup>13</sup>C are quoted relative to residual signals of the solvent on the ppm scale. <sup>1</sup>H NMR peaks are reported as singlet (s), doublet (d), triplet (t), quint. (quintet), m (multiplet), br. (broad), dd (doublet of doublet). Coupling constants (J values) are reported in Hertz (Hz) and are H-H coupling constants unless otherwise stated. In the case of amide rotamers, and when possible, only the major rotamer has been assigned for chemical shifts, and areas underneath all rotameric peaks have been considered for integration calculations. Peak assignments were carried out with the aid of <sup>1</sup>H COSY and <sup>1</sup>H-<sup>13</sup>C HSQC experiments where necessary. NMR analysis was carried out with MestReNova, version 6. Infrared spectra were obtained on a Perkin Elmer Spectrum 100 FTIR Spectrometer operating in ATR mode. For synthetic products mass spectra were obtained from the UCL mass spectrometry service on a Thermo Orbitrap Exactive Plus (ESI) mass spectrometer.

#### 8.2.2. Compound **S1**, *tert*-butyl (4-cyanobenzyl)carbamate<sup>9</sup>

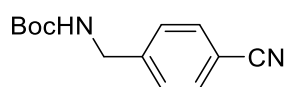

To a stirring solution of NaOH (3.6 g, 89.1 mmol) and di-*tert*-butyl dicarbonate (7.1 g, 32.6 mmol) in H<sub>2</sub>O (30 mL) was added, at room temperature, a pre-dissolved solution of 4-(aminomethyl)benzotrile (5.0 g, 29.7 mmol) in H<sub>2</sub>O (30 mL). The mixture was stirred for 16 h, after which time a white precipitate had formed. The mixture was filtered, the solid washed with H<sub>2</sub>O (100 mL), and the resulting solid dried under vacuum to yield compound **S1** as a white solid (6.1 g, 26.2 mmol, 88%). <sup>1</sup>H NMR (400 MHz, CDCl<sub>3</sub>)  $\delta$  7.62 (d, *J* = 8.3, 2H), 7.38 (d, *J* = 8.3, 2H), 4.96 (br. s, 1H), 4.37 (d, *J* = 5.9 Hz, 2H), 1.46 (s, 9H); <sup>13</sup>C NMR (100 MHz,

CDCl<sub>3</sub>)  $\delta$  144.7 (C), 132.5 (C), 127.9 (C), 118.8 (C), 111.1 (C), 80.1 (C), 44.3 (CH<sub>2</sub>), 28.4 (CH<sub>3</sub>); IR (solid) 3350, 2974, 2927, 2226, 1692 cm<sup>-1</sup>.

### 8.2.3. Compound **S2**, *tert*-butyl (4-(6-methyl-1,2,4,5-tetrazin-3-yl)benzyl)carbamate<sup>10</sup>

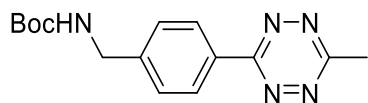

The following procedure was adapted from work by Lang *et al.*<sup>9</sup> To a stirring suspension of *tert*-butyl carbamate **S1** (3.0 g, 12.9 mmol), acetonitrile (6.72 mL, 12.9 mmol), and Zn(OTf)<sub>2</sub> (2.34 g, 6.46 mmol) in 1,4-dioxane (6 mL) was added, at room temperature, hydrazine hydrate (80% w/w, 39.5 mL, 646 mmol). The reaction was heated to 65 °C and stirred for 72 h. After this time, the reaction was cooled to room temperature and diluted with EtOAc (50 mL). The mixture was washed with 1 M HCl (50 mL), and the aqueous phase extracted with EtOAc (2 × 30 mL). The organic phase was dried (MgSO<sub>4</sub>), filtered and solvent was then removed *in vacuo*. The resulting crude residue was dissolved in a mixture of DCM and acetic acid (1:1, 200 mL), and to this was added NaNO<sub>2</sub> (17.8 g, 258 mmol) slowly over a period of 15 min, during which time the reaction turned bright red. The reaction was then diluted with DCM (200 mL), washed with sodium bicarbonate (sat. aq., 200 mL) and the aqueous phase extracted with DCM (2 × 100 mL). The organic phases were combined and then dried (MgSO<sub>4</sub>), filtered and the solvent was then removed *in vacuo*. The resulting residue was purified by flash column chromatography (20% EtOAc/petrol) to yield tetrazine **S2** as a pink solid (1.07 g, 3.55 mmol, 28%). <sup>1</sup>H NMR (400 MHz, CDCl<sub>3</sub>)  $\delta$  8.55 (d, *J* = 8.4 Hz, 2H), 7.50 (d, *J* = 8.3 Hz, 2H), 4.97 (br. s, 1H), 4.44 (d, *J* = 5.8 Hz, 2H), 3.09 (s, 3H), 1.48 (s, 9H); <sup>13</sup>C NMR (100 MHz, CDCl<sub>3</sub>)  $\delta$  167.3 (C), 164.0 (C), 144.0 (C), 130.1 (C), 128.3 (C), 128.1 (C), 80.1 (C), 28.5 (CH<sub>2</sub>), 21.1 (CH<sub>3</sub>); IR (solid) 3339, 2974, 2928, 1696, 1516 cm<sup>-1</sup>.

### 8.2.4. Compound **S3**, 5-((4-(6-methyl-1,2,4,5-tetrazin-3-yl)benzyl)amino)-5-oxopentanoic acid<sup>11</sup>

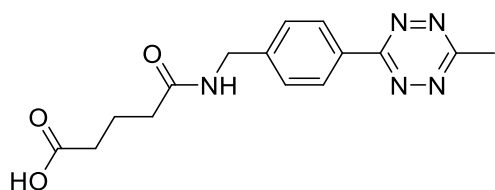

*Tert*-butyl (4-(6-methyl-1,2,4,5-tetrazin-3-yl)benzyl)carbamate **S2** (800 mg, 2.65 mmol) was dissolved in a mixture of TFA and DCM (1:4, 20 mL) and the solution was stirred at room temperature for 2 h. The solvent was then removed *in vacuo* and the mixture re-dissolved in THF (50 mL). To this solution was added glutaric anhydride (605 mg, 5.31 mmol) and the mixture stirred at 55 °C for 16 h. The solvent was removed *in vacuo* and the mixture re-dissolved in sat. aq. K<sub>2</sub>CO<sub>3</sub> solution (100 mL). The mixture was then acidified with 15% HCl aq. solution until the mixture stopped producing CO<sub>2(g)</sub> on acid. The mixture was then extracted with EtOAc (3 × 50 mL), and the combined organic phases washed with H<sub>2</sub>O (4 × 30 mL) and

brine (30 mL), and then dried (MgSO<sub>4</sub>). Any precipitate formed during extraction was re-dissolved in sat. aq. K<sub>2</sub>CO<sub>3</sub> solution (30 mL) and the work-up was repeated on this solution and the dried organic phases were combined, filtered and the solvent removed *in vacuo* to yield compound **S3** as a purple powder (691 mg, 2.2 mmol, 83%) without further purification. <sup>1</sup>H NMR (400 MHz, CDCl<sub>3</sub>) δ 8.41 (d, *J* = 8.4, 2H), 7.51 (d, *J* = 8.5 Hz, 2H), 4.38 (d, *J* = 6.0 Hz, 2H), 4.27 (q, *J* = 7.4 Hz, 4H), 2.98 (s, 3H), 1.76 (quint., *J* = 7.4 Hz, 2 H); <sup>13</sup>C NMR (100 MHz, CDCl<sub>3</sub>) δ 174.2 (C), 171.9 (C), 167.1 (C), 163.2 (C), 144.5 (C), 130.4 (C), 128.0 (C), 127.5 (C), 41.9 (CH<sub>2</sub>), 34.4 (CH<sub>2</sub>), 33.0 (CH<sub>2</sub>), 20.8 (CH<sub>3</sub>), 20.7 (CH<sub>2</sub>); IR (thin film) 3271, 3025, 2973, 2923, 2880, 1694, 1630, 1523 cm<sup>-1</sup>.

8.2.1. Compound **S4**, *N*<sup>1</sup>-(3-(2-(2-(3-aminopropoxy)ethoxy)ethoxy)propyl)-*N*<sup>5</sup>-(4-(6-methyl-1,2,4,5-tetrazin-3-yl)benzyl)glutaramide<sup>12</sup>

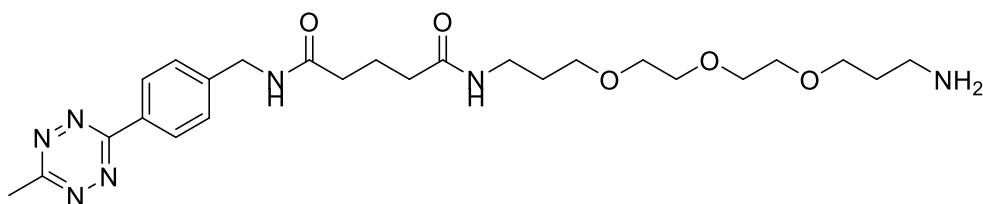

To a solution of *O,O'*-bis(3-aminopropyl)diethylene glycol (280 mg, 1.27 mmol) in DCM (5 mL) was added slowly, at room temperature, a solution of 5-((4-(6-methyl-1,2,4,5-tetrazin-3-yl)benzyl)amino)-5-oxopentanoic acid **S3** (200 mg, 0.63 mmol), HATU (240 mg, 0.63 mmol), and NEt<sub>3</sub> (64 mg, 0.63 mmol) in DCM (5 mL). The resulting solution was stirred at room temperature for 16 h. The solvent was then removed *in vacuo*, and the mixture re-dissolved in 1 M HCl solution (20 mL) and washed with DCM (3 × 20 mL) to remove unreacted 5-((4-(6-methyl-1,2,4,5-tetrazin-3-yl)benzyl)amino)-5-oxopentanoic acid **S3**. The aqueous phase was then basified with sat. aq. K<sub>2</sub>CO<sub>3</sub> solution until CO<sub>2(g)</sub> evolution stopped, and then extracted with DCM (3 × 20 mL). The combined organic phases were extracted with 1 M HCl solution (20 mL). The aqueous phase was basified with sat. aq. K<sub>2</sub>CO<sub>3</sub> solution until CO<sub>2(g)</sub> evolution stopped, and then extracted with DCM (3 × 20 mL). The combined organic phases were washed with brine (20 mL), dried (MgSO<sub>4</sub>), filtered and the solvent removed *in vacuo*. The crude residue was purified by flash column chromatography (10–30% MeOH in DCM) to afford compound **S4** (47.6 mg, 0.09 mmol, 15%) as a purple oil. <sup>1</sup>H NMR (600 MHz, CDCl<sub>3</sub>) δ 8.49 (d, *J* = 8.4 Hz, 2H), 8.35 (t, *J* = 5.8 Hz, 1H), 7.57 (d, *J* = 8.5 Hz, 2H), 6.67 (t, *J* = 6.1 Hz, 1H), 4.52 (d, *J* = 6.2 Hz, 2H), 3.71 (t, *J* = 5.3 Hz, 2H), 3.65–3.61 (m, 4H), 3.61–3.57 (m, 4H), 3.50 (t, *J* = 5.6 Hz, 2H), 3.32 (q, *J* = 6.8 Hz, 2H), 3.19–3.15 (m, 2H), 3.08 (s, 3H), 2.40 (t, *J* = 7.5 Hz, 2H), 2.30 (t, *J* = 6.9 Hz, 2H), 2.03–1.96 (m, 4H), 1.77 (quint., *J* = 6 Hz, 2H); <sup>13</sup>C NMR (150 MHz, CDCl<sub>3</sub>) δ 174.0 (C), 173.3 (C), 167.2 (C), 164.2 (C), 144.6 (C), 130.4 (C), 128.8 (CH), 128.1 (CH), 70.9 (CH<sub>2</sub>), 70.7 (CH<sub>2</sub>), 69.8 (CH<sub>2</sub>), 69.7 (CH<sub>2</sub>), 69.6 (CH<sub>2</sub>), 68.3 (CH<sub>2</sub>), 43.0 (CH<sub>2</sub>), 40.7 (CH<sub>2</sub>), 36.5 (CH<sub>2</sub>), 35.4 (CH<sub>2</sub>), 35.1 (CH<sub>2</sub>), 30.0 (CH<sub>2</sub>), 26.1 (CH<sub>2</sub>), 21.9 (CH<sub>2</sub>), 21.3 (CH<sub>3</sub>). IR (thin film) 3302, 2945, 2831, 1642, 1630, 1542 cm<sup>-1</sup>.

8.2.2. Compound **S5**, *N*<sup>1</sup>-(2-(2-(2-(2-azidoethoxy)ethoxy)ethoxy)ethyl)-*N*<sup>5</sup>-(4-(6-methyl-1,2,4,5-tetrazin-3-yl)benzyl)glutaramide<sup>3</sup>

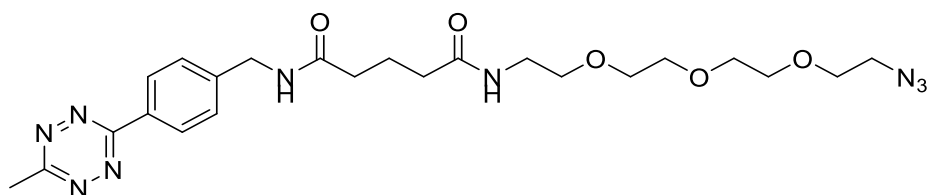

To a solution of 5-((4-(6-methyl-1,2,4,5-tetrazin-3-yl)benzyl)amino)-5-oxopentanoic acid **S3** (200 mg, 0.63 mmol) in DCM (5 mL) was added, at room temperature, HATU (240 mg, 0.63 mmol), and NEt<sub>3</sub> (87.8 μL, 0.63 mmol), and the reaction stirred for 5 min. Subsequently, to this solution was added, at room temperature, a solution of 2-(2-(2-(2-azidoethoxy)ethoxy)ethoxy)ethan-1-amine (387.5 μL, 1.96 mmol) in DCM (5 mL), and the resulting solution was stirred at room temperature for 16 h. The reaction was then diluted with EtOAc (25 mL) and H<sub>2</sub>O (25 mL) and the phases separated. The aqueous phase was extracted with EtOAc (3 × 25 mL) and the combined organic phases were washed with H<sub>2</sub>O (3 × 25 mL), brine (20 mL), dried (MgSO<sub>4</sub>), filtered and the solvent removed *in vacuo*. The crude residue was purified by flash column chromatography (0-10% MeOH in DCM) to afford *N*<sup>1</sup>-(2-(2-(2-(2-azidoethoxy)ethoxy)ethoxy)ethyl)-*N*<sup>5</sup>-(4-(6-methyl-1,2,4,5-tetrazin-3-yl)benzyl)glutaramide **S5** (209.5 mg, 0.51 mmol, 64%) as a purple solid. <sup>1</sup>H NMR (400 MHz, CDCl<sub>3</sub>) δ 8.55 (d, *J* = 8.4 Hz, 2H), 7.51 (d, *J* = 8.5 Hz, 2H), 6.61 (br. s, 1H), 6.16 (br. s, 1H), 4.55 (d, *J* = 6.0 Hz, 2H), 3.68–3.59 (m, 10 H), 3.56–3.52 (m, 2H), 3.45–3.36 (m, 4H), 3.09 (s, 3H), 2.35 (t, *J* = 7.1 Hz, 2H), 2.26 (t, *J* = 6.9 Hz, 2H), 2.01 (quint., *J* = 6.9 Hz, 2 H); <sup>13</sup>C NMR (100 MHz, CDCl<sub>3</sub>) δ 172.7 × 2 (C), 167.3 (C), 164.0 (C), 143.6 (C), 131.0 (C), 128.6 (CH), 128.3 (CH), 70.8 (CH<sub>2</sub>), 70.7 (CH<sub>2</sub>), 70.6 (CH<sub>2</sub>), 70.3 (CH<sub>2</sub>), 70.1(CH<sub>2</sub>), 69.8 (CH<sub>2</sub>), 50.7 (CH<sub>2</sub>), 43.3 (CH<sub>2</sub>), 39.3 (CH<sub>2</sub>), 35.3 (CH<sub>2</sub>), 35.2 (CH<sub>2</sub>), 22.0 (CH<sub>2</sub>), 21.2 (CH<sub>3</sub>). IR (solid) 3298, 3076, 2868, 2101, 1637, 1541 cm<sup>-1</sup>. HRMS (ESI) calcd for C<sub>23</sub>H<sub>34</sub>N<sub>9</sub>O<sub>5</sub> [M+H]<sup>+</sup> 516.2677; observed 516.2677.

8.2.3. Compound **S6**, di-*tert*-butyl 1-methylhydrazine-1,2-dicarboxylate<sup>2</sup>

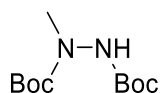

To a solution of methyl hydrazine (1.14 mL, 21.7 mmol) in propan-2-ol (16 mL), was added drop-wise over 30 min a solution of di-*tert*-butyl dicarbonate (11.4 g, 52.1 mmol, pre-dissolved in DCM (12 mL)). The reaction was then stirred at 21 °C for 16 h. After this time, the solvents were removed *in vacuo* and the crude residue purified by flash column chromatography (0% to 15% EtOAc/petrol) to afford di-*tert*-butyl-1-methylhydrazine-1,2-dicarboxylate **S6** (4.67 g, 19.1 mmol, 88%) as a white solid. <sup>1</sup>H NMR (400 MHz, CDCl<sub>3</sub>, rotamers) δ 6.41–6.15 (m, 1H) 3.10 (s, 3H), 1.46–1.45 (m, 18H); <sup>13</sup>C NMR (150 MHz, CDCl<sub>3</sub>, rotamers) δ 155.9 (C), 81.3 (C), 37.6 (CH<sub>3</sub>), 28.3 (CH<sub>3</sub>); IR (solid) 3299, 2974, 2929, 1703 cm<sup>-1</sup>.

8.2.4. Compound **S7**, di-*tert*-butyl 1-(3-(*tert*-butoxy)-3-oxopropyl)-2-methylhydrazine-1,2-dicarboxylate<sup>2</sup>

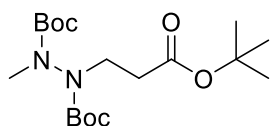

To a solution of di-*tert*-butyl 1-methylhydrazine-1,2-dicarboxylate **S6** (3.00 g, 12.2 mmol) in *tert*-butanol (15 mL) was added 10% aq. NaOH (0.5 mL) and the reaction mixture stirred at 21 °C for 10 min. After this time, *tert*-butyl acrylate (5.31 mL, 36.6 mmol) was added to the solution and the reaction mixture was heated at 60 °C for 24 h. Following this, the solvent was removed *in vacuo* and the crude residue was dissolved in EtOAc (150 mL) and washed with water (3 × 50 mL). The organic layer was then dried (MgSO<sub>4</sub>), filtered and the solvent removed *in vacuo*. Purification of the crude residue by flash column chromatography (0% to 20% EtOAc/petrol) afforded di-*tert*-butyl-1-(3-(*tert*-butoxy)-3-oxopropyl)-2-methylhydrazine-1,2-dicarboxylate **S7** (3.33 g, 8.91 mmol, 73%) as a clear oil. <sup>1</sup>H NMR (600 MHz, CDCl<sub>3</sub>, rotamers) δ 3.82–3.47 (m, 2H), 3.03–2.94 (m, 3H), 2.47 (t, *J* = 7.1 Hz, 2H), 1.48–1.37 (m, 27H); <sup>13</sup>C NMR (150 MHz, CDCl<sub>3</sub>, rotamers) δ 171.0 (C), 155.4 (C), 154.4 (C), 81.0 (C), 44.6 (CH<sub>3</sub>), 36.6 (CH<sub>2</sub>), 34.1 (CH<sub>2</sub>), 28.3 (CH<sub>3</sub>); IR (thin film) 2974, 2931, 1709 cm<sup>-1</sup>.

8.2.5. Compound **S8**, 3-(4,5-dibromo-2-methyl-3,6-dioxo-3,6-dihydropyridazin-1(2H)-yl)propanoic acid<sup>2</sup>

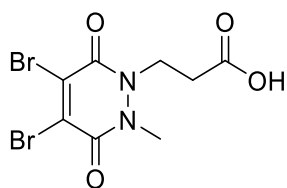

Dibromomaleic anhydride (4.00 g; 14.61 mmol) was dissolved in AcOH (80 mL) and heated under reflux for 30 min. To this solution was added di-*tert*-butyl 1-(3-(*tert*-butoxy)-3-oxopropyl)-2-methylhydrazine-1,2-dicarboxylate **S7** (4.77 g; 12.75 mmol) and the reaction heated under reflux for a further 4 h. The solvent was removed *in vacuo* by co-evaporation with toluene and the crude residue purified by flash column chromatography (50-100% EtOAc 1% AcOH/petrol) to yield 3-(4,5-dibromo-2-methyl-3,6-dioxo-3,6-dihydropyridazin-1(2H)-yl)propanoic acid **S8** (3.22 g, 9.0 mmol, 71%) as a yellow powder. <sup>1</sup>H NMR (700 MHz, CDCl<sub>3</sub>) δ 4.41 (t, *J* = 7.1 Hz, 2H), 3.69 (s, 3H), 2.77 (t, *J* = 7.1 Hz, 2H); <sup>13</sup>C NMR (150 MHz, CDCl<sub>3</sub>) δ 173.9 (C), 153.5 (C), 153.2 (C), 136.4 (C), 135.7 (C), 43.5 (C), 35.3 (C), 31.2 (C); IR (thin film) 3300-2700, 2924, 1726, 1617, 1570, 1442, 1396 cm<sup>-1</sup>.

8.2.6. Compound **S9**, 2,5-dioxopyrrolidin-1-yl 3-(4,5-dibromo-2-methyl-3,6-dioxo-3,6-dihydropyridazin-1(2H)-yl)propanoate<sup>2</sup>

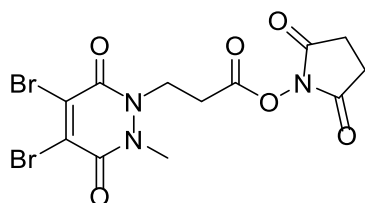

To a solution of 3-(4,5-dibromo-2-methyl-3,6-dioxo-3,6-dihydropyridazin-1(2H)-yl)propanoic acid **S8** (2.00 g; 5.62 mmol) in dry THF (40 mL) at 0 °C was added DCC (1.28 g; 6.2 mmol). The solution was stirred at 0 °C for 30 min. Following this, was added NHS (718 mg, 6.2 mmol) and the reaction stirred at room temperature for a further 16 h. The solvent was removed *in vacuo* and the crude residue purified by flash column chromatography (20-100% EtOAc/petrol) to yield pyridazinedione **S9** (796 mg, 1.76 mmol, 31%) as a white powder. <sup>1</sup>H NMR (700 MHz, CDCl<sub>3</sub>) δ 4.48 (t, *J* = 6.9, 2H), 3.68 (s, 3H), 3.10 (t, *J* = 6.9, 2H), 2.85 (br. s, 4H); <sup>13</sup>C NMR (175 MHz, CDCl<sub>3</sub>) δ 168.7 (C), 166.0 (C), 153.3 (C), 153.1 (C), 136.9 (C), 135.5 (C), 43.5 (CH<sub>2</sub>), 35.3 (CH<sub>3</sub>), 30.5 (CH<sub>2</sub>), 25.7 (CH<sub>2</sub>); IR (thin film) 2927, 2851, 1733, 1632, 1571, 1203 cm<sup>-1</sup>.



8.2.7. Compound **3**, ((1R,8S,9s)-bicyclo[6.1.0]non-4-yn-9-yl)methyl (2-(2-(2-(3-(4,5-dibromo-2-methyl-3,6-dioxo-3,6-dihydropyridazin-1(2H)-yl)propanamido)ethoxy)ethoxy)ethyl)carbamate<sup>2</sup>

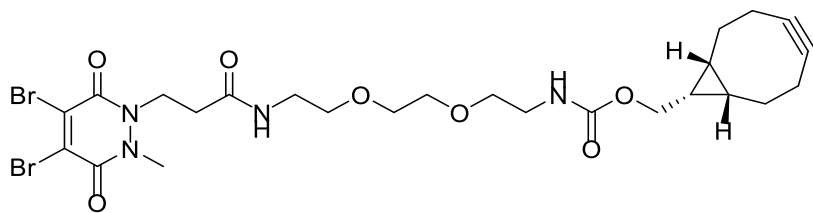

To a solution of 2,5-dioxopyrrolidin-1-yl 3-(4,5-dibromo-2-methyl-3,6-dioxo-3,6-dihydropyridazin-1(2H)-yl) propanoate **59** (100.0 mg, 0.221 mmol, pre-dissolved in MeCN (10 mL)), was added ((1R,8S,9s)-bicyclo[6.1.0]non-4-yn-9-yl)methyl (2-(2-(2-aminoethoxy)ethoxy)ethyl)carbamate (160.9 mg, 0.243 mmol) and the reaction mixture was stirred at 21 °C for 16 h. After this time, the reaction was concentrated *in vacuo* and the crude residue dissolved in CHCl<sub>3</sub> (50 mL) and washed with water (2 × 30 mL) and saturated aq. K<sub>2</sub>CO<sub>3</sub> (30 mL). The organic layer was then dried (MgSO<sub>4</sub>) and concentrated *in vacuo*. Purification of the crude residue by flash column chromatography (0% to 10% MeOH/EtOAc) afforded ((1R,8S,9S)-Bicyclo[6.1.0] non-4-yn-9-yl)methyl (2-(2-(2-(3-(4,5-dibromo-2-methyl-3,6-dioxo-3,6-dihydropyridazin-1(2H)-yl)propanamido)ethoxy)ethoxy)ethyl) carbamate **3** (105.0 mg, 0.168 mmol, 72%) as a yellow oil: <sup>1</sup>H NMR (600 MHz, CDCl<sub>3</sub>, rotamers) δ 7.84 (s, 0.3H), 6.38 (s, 0.7H), 5.78 (s, 0.3H), 5.24 (s, 0.7H), 4.44 (t, *J* = 6.6 Hz, 2H), 4.14–4.12 (m, 2H), 3.73–3.71 (m, 3H), 3.60–3.57 (m, 6H), 3.53–3.52 (m, 2H), 3.45–3.43 (m, 2H), 3.39–3.35 (m, 2H), 2.62 (t, *J* = 6.6 Hz, 2H), 2.29–2.20 (m, 6H), 1.61–1.57 (m, 2H), 1.35–1.32 (m, 1H), 0.96–0.94 (m, 2H); <sup>13</sup>C NMR (150 MHz, CDCl<sub>3</sub>, rotamers) δ 169.1 (C), 156.9 (C), 153.1 (C), 153.0 (C), 136.4 (C), 135.5 (C), 98.9 (C), 70.4 (CH<sub>2</sub>), 70.3 (CH<sub>2</sub>), 69.7 (CH<sub>2</sub>), 63.0 (CH<sub>2</sub>), 44.6 (CH<sub>2</sub>), 40.8 (CH<sub>2</sub>), 39.5 (CH<sub>2</sub>), 35.1 (CH<sub>3</sub>), 34.1 (CH<sub>2</sub>), 29.3 (CH<sub>2</sub>), 29.2 (CH<sub>2</sub>), 21.6 (CH<sub>2</sub>), 20.2 (CH<sub>2</sub>), 17.9 (CH), 14.3 (CH); IR (thin film) 3329, 2920, 2858, 1708, 1630, 1572, 1534 cm<sup>-1</sup>; LRMS (ESI), 687 (50, [M<sup>81</sup>Br<sup>81</sup>Br+Na]<sup>+</sup>) 685 (100, [M<sup>79</sup>Br<sup>81</sup>Br+Na]<sup>+</sup>), 683 (50, [M<sup>79</sup>Br<sup>79</sup>Br+Na]<sup>+</sup>), 663 (60, [M<sup>79</sup>Br<sup>81</sup>Br+H]<sup>+</sup>); HRMS (ESI) calcd for C<sub>25</sub>H<sub>35</sub>Br<sub>2</sub>N<sub>4</sub>O<sub>7</sub> [M<sup>79</sup>Br<sup>81</sup>Br+H]<sup>+</sup> 663.0847; observed 663.0846.

N.B. This batch of molecule **3** was made previously in our lab, but we have chosen to include the experimental details here for ease of reference. Please see cited paper for spectral data.<sup>2</sup>

8.2.1. Compound **4**,  $N^1$ -(17-(4,5-dibromo-2-methyl-3,6-dioxo-3,6-dihydropyridazin-1(2H)-yl)-15-oxo-4,7,10-trioxa-14-azaheptadecyl)- $N^5$ -(4-(6-methyl-1,2,4,5-tetrazin-3-yl)benzyl)glutaramide<sup>12</sup>

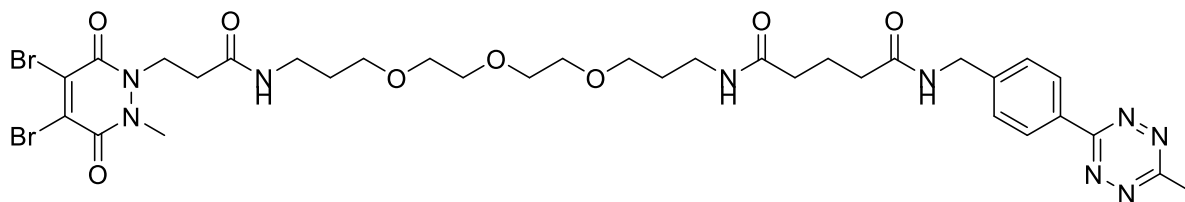

To a solution of 2,5-dioxopyrrolidin-1-yl 3-(4,5-dibromo-2-methyl-3,6-dioxo-3,6-dihydropyridazin-1(2H)-yl) propanoate **S9** (61.2 mg, 140.0  $\mu\text{mol}$ ) in DCM (5 mL), was added  $N^1$ -(3-(2-(2-(3-aminopropoxy)ethoxy)ethoxy)propyl)- $N^5$ -(4-(6-methyl-1,2,4,5-tetrazin-3-yl)benzyl)glutaramide **S4** (27.6 mg, 58.0  $\mu\text{mol}$ ) and  $\text{NEt}_3$  (7.4  $\mu\text{L}$ , 5.4 mg, 53.0  $\mu\text{mol}$ ), and the reaction mixture was stirred at room temperature for 3 h. After this time, the reaction was concentrated *in vacuo* and the crude residue dissolved in  $\text{CHCl}_3$  (25 mL) and washed with water (2  $\times$  15 mL) and sat. aq.  $\text{K}_2\text{CO}_3$  (15 mL). The organic layer was then dried ( $\text{MgSO}_4$ ), filtered and the solvent removed *in vacuo*. Purification of the crude residue by flash column chromatography (5% to 20% MeOH/EtOAc) afforded compound **4** (15.8 mg, 18.0  $\mu\text{mol}$ , 32%) as a purple oil.  $^1\text{H}$  NMR (600 MHz,  $\text{CDCl}_3$ )  $\delta$  8.53 (d,  $J$  = 8.4 Hz, 2H), 7.50 (d,  $J$  = 8.5 Hz, 2H), 7.04 (t,  $J$  = 5.2 Hz, 1H), 6.80 (t,  $J$  = 5.8 Hz, 1H), 6.46 (t,  $J$  = 5.3 Hz, 1H), 4.55 (d,  $J$  = 6.0 Hz, 2H), 4.39 (t,  $J$  = 6.9 Hz, 2H), 3.69 (s, 3H), 3.63–3.50 (m, 12H), 3.36–3.26 (m, 4H), 3.09 (s, 3H), 2.80 (d,  $J$  = 4.8 Hz, 1H), 2.56 (t,  $J$  = 6.9 Hz, 2H), 2.36 (t,  $J$  = 7.3 Hz, 2H), 2.26 (t,  $J$  = 6.9 Hz, 2H), 1.99 (app. quint.,  $J$  = 7.1 Hz, 2H), 1.78–1.69 (m, 4H);  $^{13}\text{C}$  NMR (150 MHz,  $\text{CDCl}_3$ )  $\delta$  173.0 (C), 172.8 (C), 169.2 (C), 167.4 (C), 164.0 (C), 153.1 (C), 152.9 (C), 143.6 (C), 136.4 (C), 135.4 (C), 131.0 (C), 128.6 (2 $\times$ CH), 128.3 (2 $\times$ CH), 70.6 (2 $\times$ CH<sub>2</sub>), 70.1 (2 $\times$ CH<sub>2</sub>), 70.0 (2 $\times$ CH<sub>2</sub>), 44.6 (CH<sub>2</sub>), 43.3 (CH<sub>2</sub>), 38.2 (CH<sub>2</sub>), 38.0 (CH<sub>2</sub>), 35.6 (CH<sub>2</sub>), 35.4 (CH<sub>2</sub>), 35.2 (CH<sub>3</sub>), 34.1 (CH<sub>2</sub>), 29.1 (CH<sub>2</sub>), 28.9 (CH<sub>2</sub>), 22.2 (CH<sub>2</sub>), 21.3 (CH<sub>3</sub>); IR (thin film) 3310, 2923, 2851, 1734, 1631, 1543  $\text{cm}^{-1}$ ; LRMS (ESI). 858 (50,  $[\text{M}^{81}\text{Br}^{81}\text{Br}+\text{H}]^+$ ), 856 (100,  $[\text{M}^{79}\text{Br}^{81}\text{Br}+\text{H}]^+$ ), 854 (50,  $[\text{M}^{79}\text{Br}^{79}\text{Br}+\text{H}]^+$ ); HRMS (ESI) calcd for  $\text{C}_{33}\text{H}_{46}\text{Br}_2\text{N}_9\text{O}_8\text{Na}$   $[\text{M}^{79}\text{Br}^{81}\text{Br}+\text{Na}]^+$  878.1630; observed 878.1639.

8.2.2. Compound **S10**, di-*tert*-butyl 1-(prop-2-yn-1-yl)hydrazine-1,2-dicarboxylate<sup>13</sup>

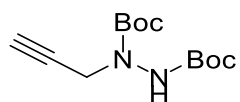

To a solution of di-*tert*-butyl hydrazine-1,2-dicarboxylate (3.00 g, 12.9 mmol) in a mixture of toluene (15 mL) and 5% aq. NaOH (15 mL) were added tetra-*n*-butylammonium bromide (104 mg, 0.32 mmol) and propargyl bromide (5.76 g, 38.7 mmol). The reaction mixture was stirred at 20  $^\circ\text{C}$  for 16 h. After this time,  $\text{H}_2\text{O}$  (20 mL) was added, and the mixture was extracted with EtOAc (3  $\times$  30 mL). The combined organic layers were washed with brine (30 mL), dried ( $\text{MgSO}_4$ ), filtered and the solvent removed *in vacuo*. Purification by flash column chromatography (20 % EtOAc/petrol) yielded di-*tert*-butyl 1-(prop-2-yn-1-yl)hydrazine-1,2-dicarboxylate **S10** (2.04 g, 7.56 mmol, 59%) as a white solid.  $^1\text{H}$  NMR (400 MHz,  $\text{CDCl}_3$ ,

rotamers)  $\delta$  6.48 (br. s, 0.7H), 6.17 (br. s, 0.2H), 4.27 (s, 2H), 2.24 (t,  $J = 2.4$  Hz, 1H), 1.47 (s, 18H);  $^{13}\text{C}$  NMR (125 MHz,  $\text{CDCl}_3$ , rotamers)  $\delta$  154.7 (C), 82.1 (C), 81.6 (C), 78.8 (C), 72.1 (CH), 39.3 ( $\text{CH}_2$ ), 28.3 ( $\text{CH}_3$ ), 28.3 ( $\text{CH}_3$ ); IR (solid) 3310, 3290, 2982, 1729, 1688, 1512  $\text{cm}^{-1}$ .

8.2.3. Compound **S11**, di-*tert*-butyl 1-(3-(*tert*-butoxy)-3-oxopropyl)-2-(prop-2-yn-1-yl)hydrazine-1,2-dicarboxylate<sup>12</sup>

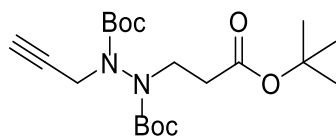

To a solution of di-*tert*-butyl 1-(prop-2-yn-1-yl)hydrazine-1,2-dicarboxylate **S10** (1.5 g, 5.55 mmol) in *tert*-BuOH (10 mL) and 5% NaOH solution (0.5 mL) was added *tert*-butyl acrylate (3.22 mL, 22.2 mmol) and the reaction mixture was heated at 60 °C for 24 h. Following this, the solvent was removed *in vacuo* and the crude residue was dissolved in EtOAc (75 mL) and washed with  $\text{H}_2\text{O}$  ( $3 \times 25$  mL). The organic layer was then dried ( $\text{MgSO}_4$ ), filtered and the solvent removed *in vacuo* to afford di-*tert*-butyl 1-(3-(*tert*-butoxy)-3-oxopropyl)-2-(prop-2-yn-1-yl)hydrazine-1,2-dicarboxylate **S11** (1.84 g, 4.6 mmol, 83%) as a clear oil.  $^1\text{H}$  NMR (400 MHz,  $\text{CDCl}_3$ , rotamers)  $\delta$  4.69–3.58 (m, 2H), 3.85–3.65 (m, 2H), 2.69–2.60 (m, 2H), 2.27 (t,  $J = 2.5$  Hz, 1H), 1.60–1.38 (m, 27H);  $^{13}\text{C}$  NMR (100 MHz,  $\text{CDCl}_3$ , rotamers)  $\delta$  171.0 (C), 154.5 (C), 154.3 (C), 82.0 (C), 81.4 (C), 80.7 (C), 78.4 (C), 73.0 (CH), 46.1 ( $\text{CH}_2$ ), 39.4 ( $\text{CH}_2$ ), 34.2 ( $\text{CH}_2$ ), 28.3 ( $\text{CH}_3$ ), 28.2 ( $\text{CH}_3$ ); IR (thin film) 3262, 2978, 1709  $\text{cm}^{-1}$ .

8.2.4. Compound **S12**, 3-(4,5-dibromo-3,6-dioxo-2-(prop-2-yn-1-yl)-3,6-dihydropyridazin-1(2*H*)-yl)propanoic acid<sup>12</sup>

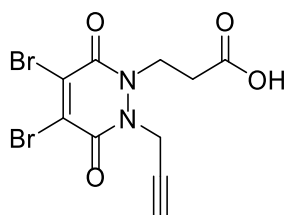

Dibromomaleic anhydride (1.13 g, 4.14 mmol) was dissolved in AcOH (30 mL) and heated under reflux for 30 min. To this solution was added di-*tert*-butyl 1-(3-(*tert*-butoxy)-3-oxopropyl)-2-(prop-2-yn-1-yl)hydrazine-1,2-dicarboxylate **S11** (1.5 g, 3.76 mmol) and the reaction heated under reflux for a further 4 h. The solvent was removed *in vacuo* by co-evaporation with toluene and the crude residue was purified by flash column chromatography (25-100% (99% EtOAc, 1% AcOH)/petrol) to yield 3-(4,5-dibromo-3,6-dioxo-2-(prop-2-yn-1-yl)-3,6-dihydropyridazin-1(2*H*)-yl)propanoic acid **S12** (926 mg, 2.44 mmol, 65%) as a yellow powder.  $^1\text{H}$  NMR (400 MHz,  $\text{DMSO-d}_6$ )  $\delta$  12.48 (br. s, 1 H), 4.91 (d,  $J = 2.4$  Hz, 2H), 4.27 (t,  $J = 7.4$  Hz, 2H), 3.53 (t,  $J = 2.4$  Hz, 1H), 2.66 (t,  $J = 7.4$  Hz, 2H);  $^{13}\text{C}$  NMR (100 MHz,  $\text{DMSO-d}_6$ )  $\delta$  171.9 (C), 153.4 (C),

153.0 (C), 136.2 (C), 135.1 (C), 77.2 (C), 76.7 (CH), 43.4 (CH<sub>2</sub>), 37.6 (CH<sub>2</sub>), 31.5 (CH<sub>2</sub>); IR (solid) 3216, 2979, 2121 (small), 1725, 1660, 1620, 1577 cm<sup>-1</sup>.

8.2.5. Compound **S13**, 3-(4,5-dibromo-2-((1-(1-(4-(6-methyl-1,2,4,5-tetrazin-3-yl)phenyl)-3,7-dioxo-11,14,17-trioxa-2,8-diazanonadecan-19-yl)-1*H*-1,2,3-triazol-4-yl)methyl)-3,6-dioxo-3,6-dihydropyridazin-1(2*H*)-yl)propanoic acid<sup>3</sup>

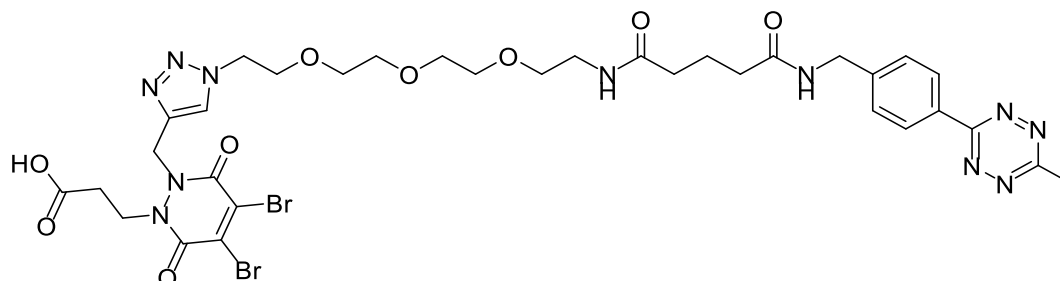

To a solution of *N*<sup>1</sup>-(2-(2-(2-(2-azidoethoxy)ethoxy)ethoxy)ethyl)-*N*<sup>5</sup>-(4-(6-methyl-1,2,4,5-tetrazin-3-yl)benzyl)glutaramide **S5** (50.0 mg, 97.0 μmol) and 3-(4,5-dibromo-3,6-dioxo-2-(prop-2-yn-1-yl)-3,6-dihydropyridazin-1(2*H*)-yl)propanoic acid **S12** (44.3 mg, 116.6 μmol) in THF (10 mL) at 21 °C was added DIPEA (16.8 μL, 97.0 μmol) and CuI (9.4 mg, 48.5 μmol) and the mixture stirred at 21 °C for 5 h. The mixture was then filtered, and the solvent removed *in vacuo*. The mixture was dissolved in H<sub>2</sub>O (10 mL) and basified with sat. aq. NaHCO<sub>3</sub> (10 mL), and then washed with DCM (3 × 10 mL). The organic phase was discarded, and DCM (10 mL) was added to the aqueous phase. The aqueous phase was then acidified with 4 M HCl until the evolution of CO<sub>2(g)</sub> stopped and the purple product mostly moved to the organic phase. The aqueous phase was then extracted with further DCM (3 × 10 mL). The combined organic phases were washed with brine, dried (MgSO<sub>4</sub>), filtered and the solvent removed *in vacuo*. The crude residue was purified by flash column chromatography (0-20% (99% MeOH, 1% AcOH)/DCM) to yield 3-(4,5-dibromo-2-((1-(1-(4-(6-methyl-1,2,4,5-tetrazin-3-yl)phenyl)-3,7-dioxo-11,14,17-trioxa-2,8-diazanonadecan-19-yl)-1*H*-1,2,3-triazol-4-yl)methyl)-3,6-dioxo-3,6-dihydropyridazin-1(2*H*)-yl)propanoic acid **S13** (67.2 mg, 75.0 μmol, 77%) as a purple solid: <sup>1</sup>H NMR (400 MHz, DMSO-*d*<sub>6</sub>) δ 8.47 (s, 1H) 8.42 (d, *J* = 8.3 Hz, 2H), 8.10 (s, 1H), 7.88 (s, 1H), 7.51 (d, *J* = 8.3 Hz, 2H), 5.35 (br. s, 2H), 4.50 (t, *J* = 5.1 Hz, 2H), 4.38 (d, *J* = 6.0 Hz, 2H), 4.30 (s 2H), 3.78 (t, *J* = 5.3 Hz, 2H), 3.51–3.43 (m, 10 H), 3.39 (t, *J* = 6.0 Hz, 2H), 3.18 (q, *J* = 5.9 Hz, 2H), 2.99 (s, 3H), 2.18 (t, *J* = 7.5 Hz, 2H), 2.10 (t, *J* = 7.4 Hz, 2H), 1.76 (quint., *J* = 7.7 Hz, 2H); <sup>13</sup>C NMR (125 MHz, DMSO-*d*<sub>6</sub>) δ 172.0 (C), 171.8 (C), 167.1 (C), 163.2 (C), 153.5 (C), 152.9 (C), 144.6 (C), 135.9 (C), 135.2 (C), 130.4 (C), 128.1 (CH), 127.5 (CH), 124.5 (CH), 69.7 (CH<sub>2</sub>), 69.6 × 2 (CH<sub>2</sub>), 69.2 (CH<sub>2</sub>), 68.6 (CH<sub>2</sub>), 54.9 (CH<sub>2</sub>), 49.6 (CH<sub>2</sub>), 41.8 (CH<sub>2</sub>), 34.8 (CH<sub>2</sub>), 34.7 (CH<sub>2</sub>), 21.5 (CH<sub>2</sub>), 20.9 (CH<sub>3</sub>). IR (solid) 3335, 2924, 1721, 1630, 1545 cm<sup>-1</sup>. HRMS (ESI) calcd for C<sub>33</sub>H<sub>42</sub>Br<sub>2</sub>N<sub>11</sub>O<sub>9</sub> [M<sup>79</sup>Br<sup>81</sup>Br+H]<sup>+</sup> 896.1435; observed 896.1503.

8.2.6. Compound **1**,  $N^1$ -(2-(2-(2-(2-(4-((2-(1-azido-13-oxo-3,6,9-trioxa-12-azapentadecan-15-yl)-4,5-dibromo-3,6-dioxo-3,6-dihydropyridazin-1(2*H*)-yl)methyl)-1*H*-1,2,3-triazol-1-yl)ethoxy)ethoxy)ethoxy)ethyl)- $N^5$ -(4-(6-methyl-1,2,4,5-tetrazin-3-yl)benzyl)glutaramide<sup>3</sup>

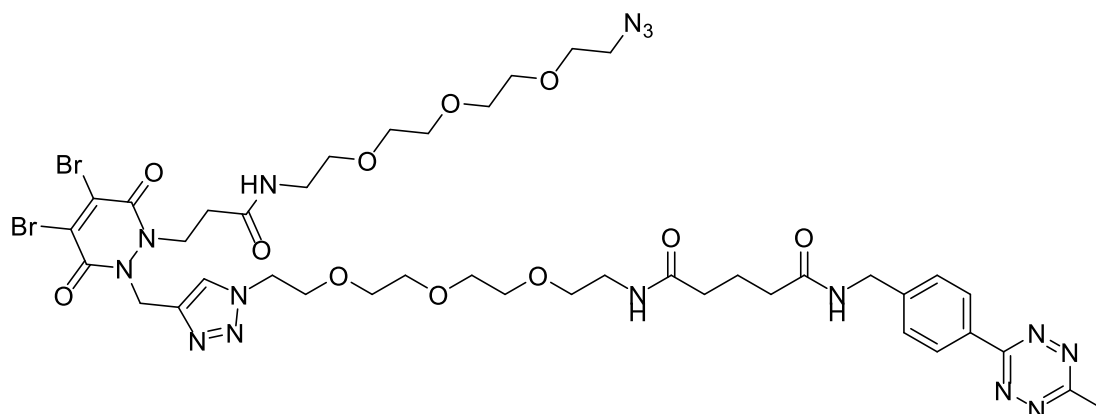

To a solution of 3-(4,5-dibromo-2-((1-(1-(4-(6-methyl-1,2,4,5-tetrazin-3-yl)phenyl)-3,7-dioxo-11,14,17-trioxa-2,8-diazanonadecan-19-yl)-1*H*-1,2,3-triazol-4-yl)methyl)-3,6-dioxo-3,6-dihydropyridazin-1(2*H*)-yl)propanoic acid **S13** (40 mg, 45  $\mu$ mol) in DCM (2.5 mL) was added, at 21 °C, HATU (28.1 mg, 74  $\mu$ mol), and DIPEA (5.78 mg, 45  $\mu$ mol), and the reaction stirred for 5 min. Subsequently, to this solution was added at 21 °C a solution of 2-(2-(2-(2-azidoethoxy)ethoxy)ethoxy)ethan-1-amine (14.6 mg, 67  $\mu$ mol) in DCM (2.5 mL), and the resulting solution was stirred at room temperature for 16 h. After this time, the reaction was diluted with EtOAc (10 mL) and washed with sat. aq.  $\text{NaHCO}_3$  (3  $\times$  10 mL), 1 M HCl (3  $\times$  10 mL),  $\text{H}_2\text{O}$  (10 mL), brine (10 mL), dried ( $\text{MgSO}_4$ ), filtered and the solvent removed *in vacuo*. The crude residue was purified by flash column chromatography (0-10% MeOH in DCM) to afford  $N^1$ -(2-(2-(2-(2-(4-((2-(1-azido-13-oxo-3,6,9-trioxa-12-azapentadecan-15-yl)-4,5-dibromo-3,6-dioxo-3,6-dihydropyridazin-1(2*H*)-yl)methyl)-1*H*-1,2,3-triazol-1-yl)ethoxy)ethoxy)ethoxy)ethyl)- $N^5$ -(4-(6-methyl-1,2,4,5-tetrazin-3-yl)benzyl)glutaramide **1** (16.7 mg, 15  $\mu$ mol, 34%) as a purple solid.  $^1\text{H}$  NMR (500 MHz,  $\text{CDCl}_3$ )  $\delta$  8.52 (d,  $J$  = 8.4 Hz, 2H), 7.84 (s, 1H), 7.50 (d,  $J$  = 8.5 Hz, 2H), 6.74 (br. s, 1H), 6.65 (br. s, 1H), 6.43 (br. s, 1H), 4.65 (t,  $J$  = 6.8 Hz, 2H), 4.54 (d,  $J$  = 5.9 Hz, 2H), 4.50 (t,  $J$  = 4.9 Hz, 2H), 3.85 (t,  $J$  = 5.1 Hz, 2H), 3.70–3.50 (m, 24 H), 3.41 (td,  $J$  = 10.3, 5.1 Hz, 6H), 3.09 (s, 3H), 2.66 (t,  $J$  = 6.8 Hz, 2H), 2.38 (t,  $J$  = 7.0 Hz, 2H), 2.35 (t,  $J$  = 7.1 Hz, 2H), 2.01 (quint.,  $J$  = 7.0 Hz, 2 H);  $^{13}\text{C}$  NMR (125 MHz,  $\text{CDCl}_3$ )  $\delta$  172.9 (C), 172.8 (C), 169.5 (C), 167.4 (C), 164.0 (C), 153.4 (C), 153.0 (C), 143.7 (C), 141.0 (C), 136.5 (C), 135.7 (C), 131.0 (C), 128.6 (CH), 128.3 (CH), 125.1 (CH), 70.8 ( $\text{CH}_2$ ), 70.7  $\times$  2 ( $\text{CH}_2$ ), 70.6  $\times$  3 ( $\text{CH}_2$ ), 70.4 ( $\text{CH}_2$ ), 70.3 ( $\text{CH}_2$ ), 70.1 ( $\text{CH}_2$ ), 69.9 ( $\text{CH}_2$ ), 69.6 ( $\text{CH}_2$ ), 69.3 ( $\text{CH}_2$ ), 50.8 ( $\text{CH}_2$ ), 50.5 ( $\text{CH}_2$ ), 45.2 ( $\text{CH}_2$ ), 43.3 ( $\text{CH}_2$ ), 42.7 ( $\text{CH}_2$ ), 39.5 ( $\text{CH}_2$ ), 39.4 ( $\text{CH}_2$ ), 35.5 ( $\text{CH}_2$ ), 35.3 ( $\text{CH}_2$ ), 34.0 ( $\text{CH}_2$ ), 22.0 ( $\text{CH}_2$ ), 21.3 ( $\text{CH}_3$ ). IR (solid) 3306, 2919, 2101, 1722, 1634, 1543  $\text{cm}^{-1}$ . HRMS (ESI) calcd for  $\text{C}_{41}\text{H}_{58}\text{Br}_2\text{N}_{15}\text{O}_{11}$  [ $\text{M}^{79}\text{Br}^{81}\text{Br}+\text{H}$ ]<sup>+</sup> 1096.2708; observed 1096.2782.

8.2.7. Compound **2**, bis(((1*R*,8*S*,9*S*)-bicyclo[6.1.0]non-4-yn-9-yl)methyl) (((oxybis(ethane-2,1-diyl))bis(oxy))bis(propane-3,1-diyl))dicarbamate

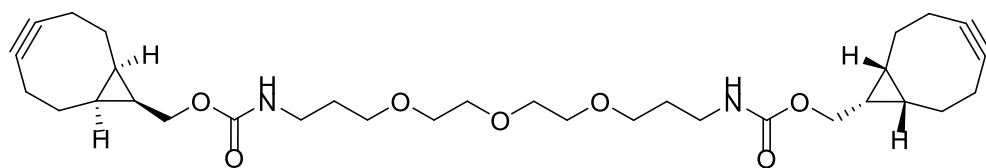

To a solution of 3,3'-((oxybis(ethane-2,1-diyl))bis(oxy))bis(propan-1-amine) (21.6 mg, 21.5  $\mu$ L, 0.098 mmol) and  $\text{NEt}_3$  (28.6 mg, 40.5  $\mu$ L, 0.392 mmol) in DCM (4 mL) was added at room temperature ((1*R*,8*S*,9*S*)-bicyclo[6.1.0]non-4-yn-9-yl)methyl (2,5-dioxopyrrolidin-1-yl) carbonate (60 mg, 0.206 mmol), and the solution stirred at room temperature under an inert atmosphere for 3 h. After this time, the solvent was removed *in vacuo*, and the crude residue purified by flash column chromatography (0-100% EtOAc/cyclohexane) to afford bis(((1*R*,8*S*,9*S*)-bicyclo[6.1.0]non-4-yn-9-yl)methyl) (((oxybis(ethane-2,1-diyl))bis(oxy))bis(propane-3,1-diyl))dicarbamate **2** (23.4 mg, 40.9  $\mu$ mol, 42%) as a yellow oil:

$^1\text{H}$  NMR (700 MHz,  $\text{CDCl}_3$ )  $\delta$  5.17 (br. s, 2H), 4.14 (d,  $J = 7.9$  Hz, 4H), 3.67–3.63 (m, 4H), 3.62–3.59 (m, 4H), 3.56 (t,  $J = 5.8$  Hz, 4H), 3.32–3.26 (m, 4H), 2.33–2.17 (m, 12H), 1.78 (quint.,  $J = 6.3$  Hz, 4H), 1.38–1.32 (m, 2H), 0.94 (t,  $J = 9.7$  Hz, 4 H);  $^{13}\text{C}$  NMR (175 MHz,  $\text{CDCl}_3$ )  $\delta$  156.9 (C), 99.0 (C), 70.7 ( $\text{CH}_2$ ), 70.4 ( $\text{CH}_2$ ), 69.7 ( $\text{CH}_2$ ), 62.7 ( $\text{CH}_2$ ), 45.3 (CH), 39.2 ( $\text{CH}_2$ ), 29.6 ( $\text{CH}_2$ ), 29.2 ( $\text{CH}_2$ ), 21.6 ( $\text{CH}_2$ ), 20.2 ( $\text{CH}_2$ ), 18.0 (CH). IR (thin film) 3331, 2917, 2866, 1694, 1522, 1243  $\text{cm}^{-1}$ . HRMS (ESI) calcd for  $\text{C}_{32}\text{H}_{48}\text{N}_2\text{O}_7$   $[\text{M}+\text{H}]^+$  573.3462; observed 573.3533.

8.2.8. Compound **S14**, 3-(Bromo-2-methyl-3,6-dioxo-3,6-dihydropyridazin-1(2*H*)-yl)propanoic acid<sup>4</sup>

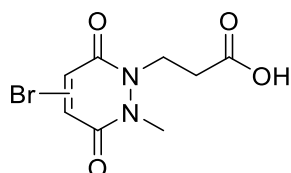

To a solution of di-*tert*-butyl-1-(3-(*tert*-butoxy)-3-oxopropyl)-2-methylhydrazine-1,2-dicarboxylate **S7** (1.50 g, 4.01 mmol) in AcOH (20 mL) was added bromomaleic anhydride (0.41 mL, 4.41 mmol) and the reaction heated under reflux for 4 h. After this time, the reaction mixture was concentrated *in vacuo* with toluene co-evaporation (3  $\times$  30 mL, as an azeotrope). The crude residue was then purified by flash column chromatography (0% to 10% MeOH/EtOAc (1% AcOH)) to afford an inseparable mixture of regioisomers 3-(4-bromo-2-methyl-3,6-dioxo-3,6-dihydropyridazin-1(2*H*)-yl)propanoic acid **S14** and 3-(5-bromo-2-methyl-3,6-dioxo-3,6-dihydropyridazin-1(2*H*)-yl)propanoic acid **S14** (804 mg, 2.90 mmol, 72%) as a white solid. m.p. 142–145  $^\circ\text{C}$ .  $^1\text{H}$  NMR (600 MHz, DMSO, regioisomers (1:1))  $\delta$  7.59 (s, 1H), 7.58 (s, 1H), 4.28 (t,  $J = 7.4$  Hz, 2H), 4.21 (t,  $J = 7.4$  Hz, 2H), 3.58 (s, 3H), 3.50 (s, 3H), 2.62–2.57 (m, 4H).  $^{13}\text{C}$  NMR (150 MHz,

DMSO-d<sub>6</sub>, regioisomers (1:1))  $\delta$  172.0 (C), 171.9 (C), 155.4 (C), 155.1 (C), 153.5 (C), 153.2 (C), 135.8 (CH), 135.5 (CH), 132.8 (C), 132.3 (C) 42.7 (CH<sub>2</sub>), 41.5 (CH<sub>2</sub>), 34.2 (CH<sub>3</sub>), 32.9 (CH<sub>3</sub>), 31.8 (CH<sub>2</sub>). IR (solid) 3058, 1722, 1619 cm<sup>-1</sup>. LRMS (ESI) 277 (100, [M<sup>79</sup>Br+H]<sup>+</sup>), 279 (95, [M<sup>81</sup>Br+H]<sup>+</sup>), HRMS (ESI) calcd for C<sub>8</sub>H<sub>10</sub>BrN<sub>2</sub>O<sub>4</sub> [M<sup>79</sup>Br+H]<sup>+</sup> 276.9818; observed 276.9820.

N.B. This batch of molecule **S14** was made previously in our lab, but we have chosen to include the experimental details here for ease of reference. Please see cited paper for spectral data.<sup>4</sup>

8.2.9. Compound **S15**, 2,5-Dioxopyrrolidin-1-yl 3-(4-bromo-2-methyl-3,6-dioxo-3,6-dihydropyridazin-1(2H)-yl)propanoate<sup>4</sup>

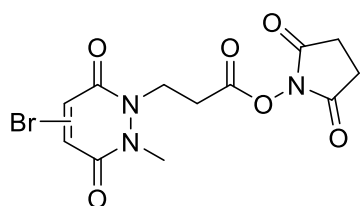

A solution of 3-(bromo-2-methyl-3,6-dioxo-3,6-dihydropyridazin-1(2H)-yl) propanoic acid **S14** (1.20 g, 4.33 mmol), in THF (10 mL) was cooled to 0 °C and was added N,N'-dicyclohexylcarbodiimide (1.0 g, 4.85 mmol). The homogenous solution was then stirred at 0 °C for 30 min. After this time, was added N-hydroxysuccinimide (535 mg, 4.67 mmol) and the reaction was stirred at 21 °C for a further 16 h. The newly formed heterogenous mixture was then filtered and the filtrate concentrated in vacuo. Purification of the crude residue by flash column chromatography (50% to 100% EtOAc/petrol) afforded an inseparable mixture of regioisomers 2,5-dioxopyrrolidin-1-yl 3-(4-bromo-2-methyl-3,6-dioxo-3,6-dihydropyridazin-1(2H)-yl)propanoate **S15** and 2,5-dioxopyrrolidin-1-yl 3-(5-bromo-2-methyl-3,6-dioxo-3,6-dihydropyridazin-1(2H)-yl)propanoate **S15** (1.0 g, 2.69 mmol, 62%) as a white powder. m.p. 140-145 °C. <sup>1</sup>H NMR (500 MHz, DMSO-d<sub>6</sub>, regioisomers (1:1))  $\delta$  7.34 (s, 1H), 7.31 (s, 1H), 4.42 (t, *J* = 7.2 Hz, 2H), 4.36 (t, *J* = 7.2 Hz, 2H), 3.62 (s, 3H), 3.55 (s, 3H), 3.06–3.01 (m, 4H), 2.79 (s, 8H). <sup>13</sup>C NMR (125 MHz, DMSO, regioisomers (1:1))  $\delta$  170.0 (C), 166.7 (C), 155.4 (C), 155.2 (C), 153.5 (C), 153.3 (C), 135.9 (CH), 135.4 (CH), 133.0 (C), 132.1 (C), 41.7 (CH<sub>2</sub>), 40.6 (CH<sub>2</sub>), 34.3 (CH<sub>3</sub>), 33.0 (CH<sub>3</sub>), 28.5 (CH<sub>2</sub>), 25.4 (CH<sub>2</sub>). IR (solid) 2944, 1808, 1778, 1731, 1632, 1596 cm<sup>-1</sup>. LRMS (ESI) 374 (100, [M<sup>79</sup>Br+H]<sup>+</sup>), 376 (95, [M<sup>81</sup>Br+H]<sup>+</sup>), HRMS (ESI) calcd for C<sub>12</sub>H<sub>12</sub>BrN<sub>3</sub>O<sub>6</sub> [M<sup>79</sup>Br+H]<sup>+</sup> 373.9988; observed 373.9979.

N.B. This batch of molecule **S15** was made previously in our lab, but we have chosen to include the experimental details here for ease of reference. Please see cited paper for spectral data.<sup>4</sup>

8.2.10. Compound **S16**, ((1*R*,8*S*,9*S*)-Bicyclo[6.1.0]non-4-yn-9-yl)methyl (2-(2-(2-(3-(4,5-dibromo-2-methyl-3,6-dioxo-3,6-dihydropyridazin-1(2*H*)-yl)propanamido)ethoxy)ethoxy)ethyl) carbamate<sup>4</sup>

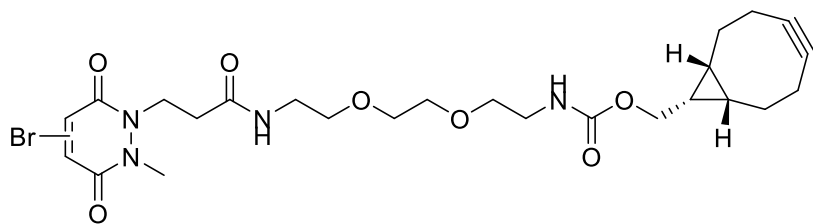

To a solution of 2,5-dioxopyrrolidin-1-yl 3-(bromo-2-methyl-3,6-dioxo-3,6-dihydropyridazin-1(2*H*)-yl)propanoate **S15** (50 mg, 0.110 mmol, pre-dissolved in MeCN (10 mL)), was added *N*-[(1*R*,8*S*,9*S*)-bicyclo[6.1.0]non-4-yn-9-ylmethoxyxycarbonyl]-1,8-diamino-3,6-dioxaoctane (31 mg, 0.122 mmol) and the reaction mixture was stirred at 21 °C for 16 h. to afford an inseparable mixture of regioisomers ((1*R*,8*S*,9*S*)-bicyclo[6.1.0]non-4-yn-9-yl)methyl (2-(2-(2-(3-(5-bromo-2-methyl-3,6-dioxo-3,6-dihydropyridazin-1(2*H*)-yl)propanamido)ethoxy)ethoxy)ethyl)carbamate **S16** and ((1*R*,8*S*,9*S*)-bicyclo[6.1.0]non-4-yn-9-yl)methyl (2-(2-(2-(3-(4-bromo-2-methyl-3,6-dioxo-3,6-dihydropyridazin-1(2*H*)-yl)propanamido)ethoxy)ethoxy)ethyl)carbamate **S16** (42 mg, 0.07 mmol, 52%) as a yellow oil: <sup>1</sup>H NMR (600 MHz, CDCl<sub>3</sub>, regioisomers (1:1)) δ 7.86 (s, 0.5H), 7.80 (s, 0.5H), 7.38-7.36 (m, 2H), 6.42-6.39 (m, 1H), 5.81-5.78 (m, 1H), 5.33 (s, 0.5H), 5.27 (m, 0.5H), 4.44 (t, *J* = 7.0 Hz, 2H), 4.37 (t, *J* = 7.0 Hz, 2H), 4.18-4.15 (m, 4H), 3.73-3.67 (m, 3H), 3.66- 3.36 (m, 27H), 2.63-2.61 (m, 4H), 2.32-2.21 (m, 12H), 1.65-1.52 (m, 4H), 1.42-1.31 (m, 2H), 0.96- 0.93 (m, 4H). <sup>13</sup>C NMR (150 MHz, CDCl<sub>3</sub>, regioisomers (1:1)) δ 171.5 (C), 168.9 (C), 156.9 (C), 155.9 (C), 139.4 (C), 136.1 (C), 135.7 (C), 98.9 (C), 70.7 (CH<sub>2</sub>), 70.3 (CH<sub>2</sub>), 69.7 (CH<sub>2</sub>), 62.3 (CH<sub>2</sub>), 60.6 (CH<sub>2</sub>), 44.2 (CH<sub>2</sub>), 43.4 (CH<sub>2</sub>), 40.8 (CH<sub>2</sub>), 39.5 (CH<sub>2</sub>), 34.7 (CH<sub>3</sub>), 34.0 (CH<sub>2</sub>), 33.4 (CH<sub>2</sub>), 33.1 (CH<sub>2</sub>), 29.2 (CH<sub>2</sub>), 21.6 (CH<sub>2</sub>), 21.0 (CH<sub>2</sub>), 20.2 (CH<sub>2</sub>), 17.9 (CH), 14.3 (CH). IR (thin film) 3331, 2989, 2857, 1715, 1645, 1572, 1534 cm<sup>-1</sup>. LRMS (ESI) 583 (95, [M<sup>79</sup>Br+H]<sup>+</sup>), 585 (100, [M<sup>81</sup>Br+H]<sup>+</sup>), HRMS (ESI) calcd for C<sub>25</sub>H<sub>35</sub>BrN<sub>4</sub>O<sub>7</sub> [M<sup>79</sup>Br+H]<sup>+</sup> 583.1714; observed 583.1763.

N.B. This batch of molecule **S16** was made previously in our lab, but we have chosen to include the experimental details here for ease of reference. Please see cited paper for spectral data.<sup>4</sup>

### 8.3. Chemical biology section

#### 8.3.1. General experimental details for chemical biology

Conjugation experiments were carried out in standard 1.5 mL Eppendorf tubes. All buffer solutions were prepared with double-deionised water and filter-sterilized for long-term storage. BBS refers to borate buffered saline (25 mM borate, 25 mM NaCl, pH 8.0, 2 mM EDTA), 5 × BBS refers to borate buffered saline (125 mM borate, 125 mM NaCl, pH 8.0, 10 mM EDTA) and PBS refers to phosphate buffered saline (10 mM phosphate, 2.7 mM KCl, 137 mM NaCl, pH 7.4) unless otherwise stated. Buffer exchange/ultrafiltration



was carried out using sample concentrators (Sartorius Stedim, Vivaspin, MWCO 3, 5 or 10 kDa) or desalting columns (Zeba™ Spin, ThermoFisher Scientific, 7k MWCO). In case where all traces of small molecule had to be removed (for the synthesis of protein-protein conjugates *via* click chemistry) the concentration of small molecule in the sample was diluted to 1 in 10 by Vivaspin, then the remainder removed by Zeba Spin; this was a crucial step for good conversion. Cetuximab (anti-EGFR), rituximab (anti-CD20), ontruzant (anti-HER2) and Herceptin (anti-HER2) were purchased from UCLH. Anti-ICOS (C398.4A) antibody was purchased from BioLegend. Anti-PD-1 (J116) and anti-CTLA4 (BN13) antibodies were purchased from BioXCell. Anti-CD3 (OKT3) antibody was purchased from either BioLegend or BioXCell. *Salmonella typhimurium* (ST) sialidase cysteine mutant **6** was expressed as described in a previous publication.<sup>6</sup> For protein A purification Pierce™ Protein A IgG binding Buffer was used. Cetuximab (anti-EGFR), anti-CD3 (OKT3) anti-CTLA4, anti-PD-1 and anti-ICOS antibody were digested using a standard antibody digestion protocol.<sup>12,14</sup> Purification by size exclusion chromatography (SEC) was carried out on an Agilent 1100 HPLC system (column: Superdex 200 increase, 10/300 GL) with a MALS system attached (Optilab T-rEX, Dawn8<sup>+</sup> Heleos, Wyatt Technology), equilibrated in PBS pH 7.5 with 0.05% NaN<sub>3</sub> at the ISMB biophysics institute. Detection was by absorption at 280 nm.

### 8.3.2. Protein LC-MS

Protein conjugates were prepared for analysis by desalting into distilled water (Zeba™ Spin, ThermoFisher Scientific, 7k MWCO) to achieve approximate concentrations of 4-5 μM (1.0 mg × mL<sup>-1</sup>) and submitted to the UCL Chemistry Mass Spectrometry Facility at the Chemistry Department, UCL, for analysis on the Agilent 6510 QTOF LC-MS system (Agilent, UK). 10-20 μL of each sample was injected onto a PLRP-S, 1000 Å, 8 μM, 150 mM × 2.1 mM column (Agilent, UK), which was maintained at 60 °C. The separation was achieved using mobile phase A (5% MeCN in 0.1% formic acid) and B (95% MeCN, 5% water 0.1% formic acid) using a gradient elution (Table 1). The column effluent was continuously electrosprayed into the capillary ESI source of the Agilent 6510 QTOF mass spectrometer and ESI mass spectra were acquired in positive electrospray ionisation (ESI) mode using the *m/z* range 1,000–8,000 in profile mode with Quad AMU set to 500. The raw data was converted to zero charge mass spectra using a maximum entropy deconvolution algorithm, over the appropriate regions as identified *via* the LC TIC trace, with the software, MassHunter (version B.07.00). The region of the LC TIC trace from which the raw data was extracted is shown in the upper left corner of the raw data and deconvoluted spectra.

Table 1 | **Gradient for LC-MS elution.**

System used: Agilent 6510 QTOF LC-MS (Agilent, UK). Column: PLRP-S, 1000 Å, 8 µM, 150 mM × 2.1 mM (Agilent, UK). Fa stands for formic acid.

| Time (min) | %A (H <sub>2</sub> O 0.1% Fa) | %B (MeCN 0.1% FA) |
|------------|-------------------------------|-------------------|
| 0          | 85                            | 15                |
| 2          | 85                            | 15                |
| 3          | 68                            | 32                |
| 4          | 68                            | 32                |
| 14         | 50                            | 50                |
| 18         | 5                             | 95                |
| 20         | 5                             | 95                |
| 22         | 85                            | 15                |
| 25         | 85                            | 15                |

### 8.3.3. SDS-PAGE gels

Non-reducing glycine-SDS-PAGE with 10%, 12% or 15% acrylamide gels (based on protein size: 10% for 45-150 kDa, 12% for 40-90 kDa and 15% for 25-45 kDa) were performed following standard lab procedures. A 6% stacking gel was used and a broad-range MW marker (10–250 kDa, PageRuler™ Plus Pre-stained Protein Ladder, Thermo Scientific™) was co-run to estimate protein masses. Samples (6-10 µL at ~10 µM protein) were mixed with loading buffer (1-2 µL, composition for 6 × SDS: 1 g SDS, 3 mL glycerol, 6 mL 0.5 M Tris buffer pH 6.8, 2 mg bromophenol blue in 10 mL) and heated at 75 °C for 3 min (or 95 °C for 5 min in case of Fab<sub>2</sub>-Sia-Biotin constructs). 6-8 µL of the samples was loaded into each well. The gels were run at 80 V for 15 min and 160 V for 40-60 min in 1 × SDS running buffer. The gels were stained with Coomassie Blue dye, and destained with distilled water under microwave irradiation.

### 8.3.4. UV-Vis spectroscopy

UV-Vis spectroscopy was used to determine the concentrations of protein constructs using a NanoDrop™ One microvolume UV-Vis spectrophotometer operating at RT. Sample buffer was used as blank for baseline correction. Extinction coefficients (ε) for proteins and small molecules (at 280 nm) are listed below (Table 2). Where possible ε<sub>280</sub> of proteins was determined from amino acid sequence information with tools such as ProtParam (<https://web.expasy.org/protparam/>). Where necessary, in lieu of sequence information, the generic value of 70000 M<sup>-1</sup>cm<sup>-1</sup> was used for Fabs. The ε<sub>280</sub> of the protein was totalled with that of the expected small molecule adducts to calculate the total ε of the construct at 280 nm (Σε<sub>280</sub>). The concentration (c) of the construct was determined by the following equation:

$$c = \frac{A_{280}}{\sum \epsilon_{280}}$$

Table 2 | Extinction coefficient ( $\epsilon$ ) values for proteins and small molecules at 280 nm.

| Protein                        | $\epsilon_{280}$ ( $M^{-1}cm^{-1}$ ) | Small molecule                                 | $\epsilon_{280}$ ( $M^{-1}cm^{-1}$ ) |
|--------------------------------|--------------------------------------|------------------------------------------------|--------------------------------------|
| Fab <sub>HER2</sub> <b>S21</b> | 71905                                | Br <sub>2</sub> PD-BCN <b>3</b>                | 2275                                 |
| Fab <sub>CD20</sub> <b>S22</b> | 82905                                | BrPD-BCN <b>S16</b>                            | 2275                                 |
| Fab <sub>EGFR</sub> <b>S17</b> | 72900                                | Br <sub>2</sub> PD-Tet <b>4</b>                | 28340                                |
| Fab <sub>Generic</sub>         | 70000                                | Br <sub>2</sub> PD-Tet-N <sub>3</sub> <b>1</b> | 28340                                |
| Sia <b>6</b>                   | 57090                                |                                                |                                      |
| mAb <sub>Generic</sub>         | 220000                               |                                                |                                      |

### 8.3.5. Standard Antibody Digestion Protocol

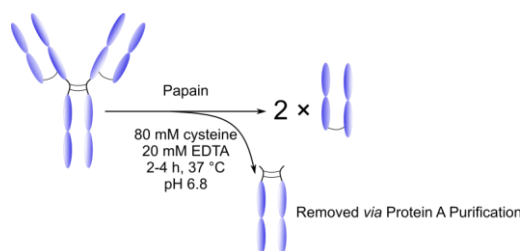

The standard antibody digestion protocol was used for the digestion of mAb<sub>EGFR</sub> (Cetuximab), mAb<sub>CD3</sub>, mAb<sub>ICOS</sub>, mAb<sub>CTLA-4</sub>, mAb<sub>PD-L1</sub> and mAb<sub>PD-1</sub>.

Full antibody (1-20 mg, 10 mg/mL) was buffer exchanged into digest buffer (20 mM NaH<sub>2</sub>PO<sub>4</sub>, 10 mM EDTA, 80 mM cysteine-HCl, pH 7.0). Immobilized papain (papain/antibody ratio 1:40 w/w) was washed three times with digest buffer and full antibody solution added. The reaction was incubated at 37 °C for 2-4 h under constant agitation (1100 rpm). The resin was separated from the digest using a filter column and washed with Pierce™ Protein A Binding Buffer three times. The digest was combined with the washes and the buffer was exchanged completely for Pierce™ Protein A Binding Buffer and the volume adjusted to 1.5 mL. The Fab and Fc were then separated by protein A purification. Representative yields: 28% Fab<sub>EGFR</sub> **S17**, 71% Fab<sub>CD3</sub> **S18**, 60% Fab<sub>PD-1</sub> **7**, 60% Fab<sub>CTLA-4</sub> **S19**, 30% Fab<sub>ICOS</sub> **S20**.

### 8.3.6. Protein A purification

The sample was applied to a NAb protein A column (Thermo Scientific) and incubated at RT with end-over-end mixing for 10 min. The non-bound Fab fraction was eluted four times with Pierce™ Protein A Binding Buffer. The bound Fc fraction was eluted four times with Pierce™ IgG elution buffer or 0.1 M glycine buffer (pH 2.5), which was neutralised with 10% (V/V) of a 1.5 M Tris base, pH 8.8 solution. The Fab and Fc solutions were buffer exchanged into BBS.

### 8.3.7. Monomeric avidin agarose purification

A monomeric avidin agarose column (800 + 600 + 400  $\mu$ L of Pierce™ Monomeric Avidin Agarose 50% aqueous slurry in a 0.8 mL Pierce™ Centrifuge Column, spun after each addition to remove liquid and thus pack column tightly) was washed with PBS (400  $\mu$ L  $\times$  2), followed by PBS (400  $\mu$ L  $\times$  22 mM biotin, pH 7.4)

to block all biotin binding sites. Then the reversible binding sites were re-generated by washing the column with elution buffer (400  $\mu\text{L} \times 4$ , glycine buffer pH 2.5). The column was equilibrated with PBS (400  $\mu\text{L} \times 2$ ) and then 400  $\mu\text{L}$  of sample was applied and incubated at RT with end-over-end mixing for 10 min. The non-bound fraction was eluted six times with PBS (400  $\mu\text{L} \times 6$ ). The bound fraction was eluted six times with PBS (400  $\mu\text{L} \times 6$ , 10 mM phosphate, 2.7 mM KCl, 137 mM NaCl, 2 mM biotin, pH 7.4).

### 8.3.8. Digestion of anti-HER2 mAb (Herceptin and Ontruzant)

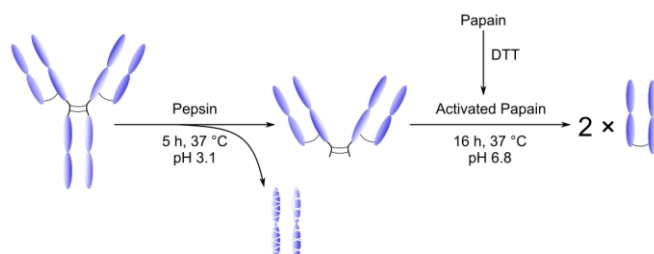

The mAb sample was buffer exchanged into sodium pepsin digest buffer (20 mM NaOAc, pH 3.1). Immobilized pepsin (732  $\mu\text{L}$ ) was washed 4 times with pepsin digest buffer and the mAb solution (1 mL, 107  $\mu\text{M}$ ) was added to this. The mixture was incubated for 5 h at 37 °C under constant agitation (1100 rpm). The resin was separated from the digest using a filter column and washed 3 times with papain digest buffer (50 mM sodium phosphate, 150 mM NaCl, 1 mM EDTA, pH 6.8). The digest was combined with the washes and the volume adjusted to 0.5 mL.

Immobilized papain (1.22 mL, 0.25 mg/mL) was activated with 10 mM DTT (in papain digest buffer) with constant agitation (1100 rpm) for 90 min at 37 °C. The resin was washed 4 times with papain digest buffer (without DTT) and the 0.5 mL of F(ab')<sub>2</sub> solution was added. The mixture was incubated for 24 h at 37 °C under constant agitation (1100 rpm). The resin was separated from the digest using a filter column, washed 3 times with PBS and the digest combined with the washes. The buffer was exchanged completely for PBS (10 mM phosphate, 2.7 mM KCl, 137 mM NaCl, pH 7.4), and the volume adjusted to 0.5 mL. Representative yield: 56% Fab<sub>HER2</sub> **S21**.

### 8.3.9. Digestion of anti-CD20 mAb (Rituximab)

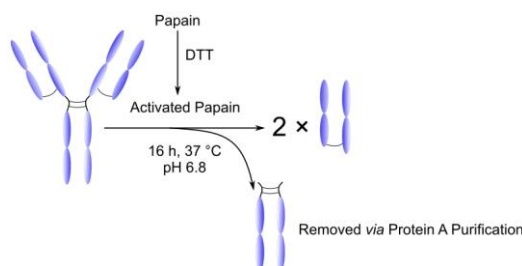

Immobilised papain (0.3 mL, 0.25 mg/mL) was activated with 10 mM DTT in papain digest buffer (50 mM phosphate, 1 mM EDTA, 150 mM NaCl, pH 6.8) under constant agitation (1100 rpm) for 1 h at 25 °C. The resin was washed with papain digest buffer (without DTT) four times and rituximab (3 mg in 0.5 mL of papain digest buffer) was added. The mixture was incubated for 16 h at 37 °C under constant agitation (1100 rpm). Then the resin was separated from the digest using a filter column and washed with Pierce™

Protein A Binding Buffer three times. The digest was combined with the washes and the buffer was exchanged completely for Pierce™ Protein A Binding Buffer and the volume adjusted to 1.5 mL. The Fab and Fc were then separated by protein A purification. Representative yields: 43% Fab<sub>CD20</sub> **S22**, 31% Fc<sub>CD20</sub> **S23**.

### 8.3.10. Reduction of Fab or sialidase **6**

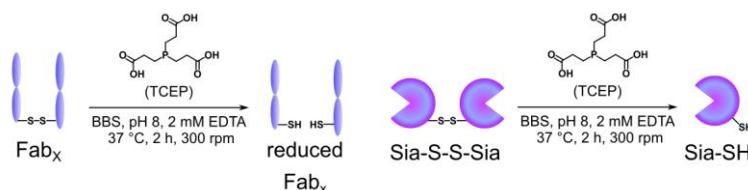

A solution of 20 mM TCEP was prepared by dissolving TCEP-HCl (15 mg) in 5 × BBS (2.6 mL). Fab, or sialidase **6** solution (10 μM, 200 μL) was prepared in BBS and 5 × BBS was added (100 μL), followed by addition of 5-60 equivalents of TCEP (20 mM in 5 × BBS, 0.5-6 μL) was added. The mixture was incubated for 120 min at 37 °C under constant agitation (300 rpm). The buffer was then exchanged for BBS. NB.: The 5 × BBS was employed to maintain the pH of the solution at 8, as TCEP-HCl is strongly acidic. TCEP-HCl equivalents used for reduction: 20 eq. for Fab<sub>EGFR</sub> **S17**, 60 eq. for Fab<sub>CD3</sub> **S18**, 60 eq. for Fab<sub>PD-1</sub> **7**, 20 eq. for Fab<sub>HER2</sub> **S21** and 20 eq. for Fab<sub>CD20</sub> **S22**.

### 8.3.11. Re-bridging of Fab or modification of sialidase **6** with pyridazinediones

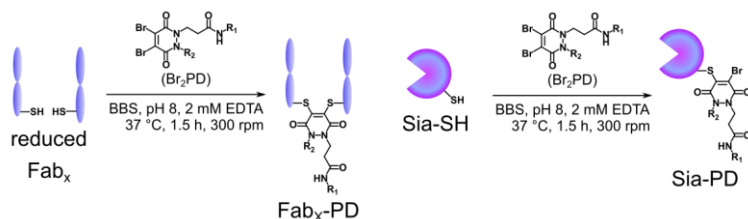

To a solution of reduced Fab<sub>x</sub>, or sialidase **6** (100 μL, 20 μM) in BBS was added 5-20 equivalents of pyridazinedione Br<sub>2</sub>PD-BCN **3** or Br<sub>2</sub>PD-Tet-N<sub>3</sub> **1** (0.5-2 μL, 20 mM in DMSO) and the mixture incubated at 37 °C with constant agitation (300 RPM) over 90-120 min. The purity of the sample was assessed by non-reducing SDS-PAGE and high-resolution LC-MS. Representative yields: 57% Sia-Tet-N<sub>3</sub> **8**, 77% Fab<sub>PD-1</sub>-Tet-N<sub>3</sub> **9**, 76% Fab<sub>HER2</sub>-BCN **10**, 57% Fab<sub>CD3</sub>-Tet-N<sub>3</sub> **14**, 65% Fab<sub>HER2</sub>-Tet-N<sub>3</sub> **15**, 65% Fab<sub>EGFR</sub>-Tet **S24**, 52% Fab<sub>CD20</sub>-BCN **S25**, 58% Fab<sub>CD20</sub>-Tet-N<sub>3</sub> **19**, 56% Fab<sub>HER2</sub>-Tet **S26**, 43% Fab<sub>CD20</sub>-Tet **S27**. Sia-BCN **S28**, Fab<sub>CD3</sub>-Tet **S29** and Fab<sub>CD3</sub>-BCN **S30** were also prepared in this manner.

### 8.3.12. General procedure for the preparation of Fab–Fab conjugates *via* SPIEDAC

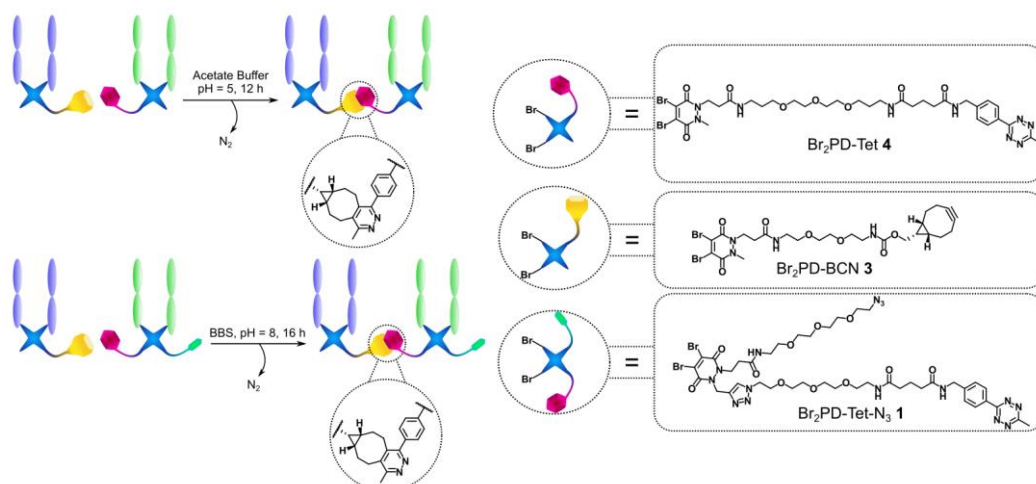

To a solution of Fab<sub>X</sub>-BCN (50 μL, 200 μM, 10 nmol, 1 eq.) in acetate buffer (20 mM, pH 5.5) or BBS was added Fab<sub>Y</sub>-Tetrazine or N<sub>3</sub>-Fab<sub>Y</sub>-Tetrazine (75 μL, 200 μM, 14 nmol, 1.4 eq.) and the reaction mixture was incubated at 30 °C or 37 °C for 16 h under an Argon atmosphere. After this time, the mixture was purified by protein A purification (if Fab<sub>X</sub> = Fab<sub>HER2</sub>) or SEC purification or taken forward without further purification. Representative yields: 24% Fab<sub>HER2</sub>-Fab<sub>CD3</sub>-N<sub>3</sub> **13**, 18% Fab<sub>CD3</sub>-Fab<sub>HER2</sub>-N<sub>3</sub> **28**, 11% Fab<sub>HER2</sub>-Fab<sub>CD3</sub> **30**. Fab<sub>HER2</sub>-Fab<sub>CD20</sub>-N<sub>3</sub> **22** and Fab<sub>CD20</sub>-Fab<sub>HER2</sub>-N<sub>3</sub> **S31** were also prepared in this manner.

N.B. initially acetate buffer was used, but after it was shown that the reaction worked in BBS at 37 °C, that protocol was used for convenience.

### 8.3.13. General procedure for preparation of trispecific antibody Fab<sub>HER2</sub>-Fab<sub>CD20</sub>-Fab<sub>EGFR</sub> **S33**

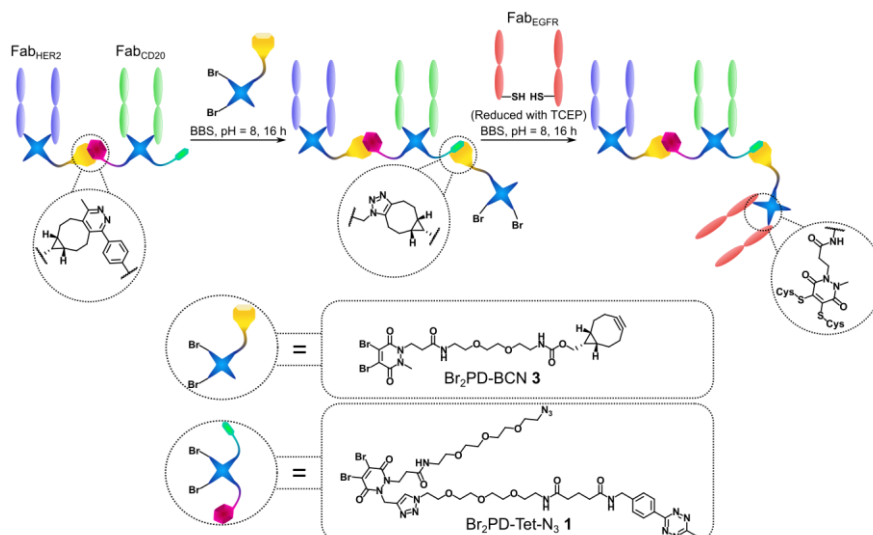

To a solution of Fab<sub>HER2</sub>-Fab<sub>CD20</sub>-N<sub>3</sub> **22** (50 μL, 200 μM, 10 nmol, 1 eq.) in BBS was added Br<sub>2</sub>PD-BCN **3** (5 μL, 20 mM in DMSO) and the mixture incubated at 30 °C for 5 h to yield Fab<sub>HER2</sub>-Fab<sub>CD20</sub>-PDBr<sub>2</sub> **S32**. The excess Br<sub>2</sub>PD-BCN **3** was removed by buffer exchange into BBS. To this solution was added reduced Fab<sub>EGFR</sub> (100 μL, 200 μM, 20 nmol, 2 eq.), and the reaction mixture was incubated at 37 °C for 16 h. After this time, the mixture was purified by SEC. Representative yield: 12% Fab<sub>HER2</sub>-Fab<sub>CD20</sub>-Fab<sub>EGFR</sub> **S33** (from Fab<sub>HER2</sub>-Fab<sub>CD20</sub>-PDBr<sub>2</sub> **S32**).

8.3.14. Preparation of bispecific-sialidase constructs; Fab<sub>CD20</sub>-Fab<sub>HER2</sub>-Sia **S36** and Fab<sub>CD20</sub>-Fab<sub>HER2</sub>-Sia **S37**

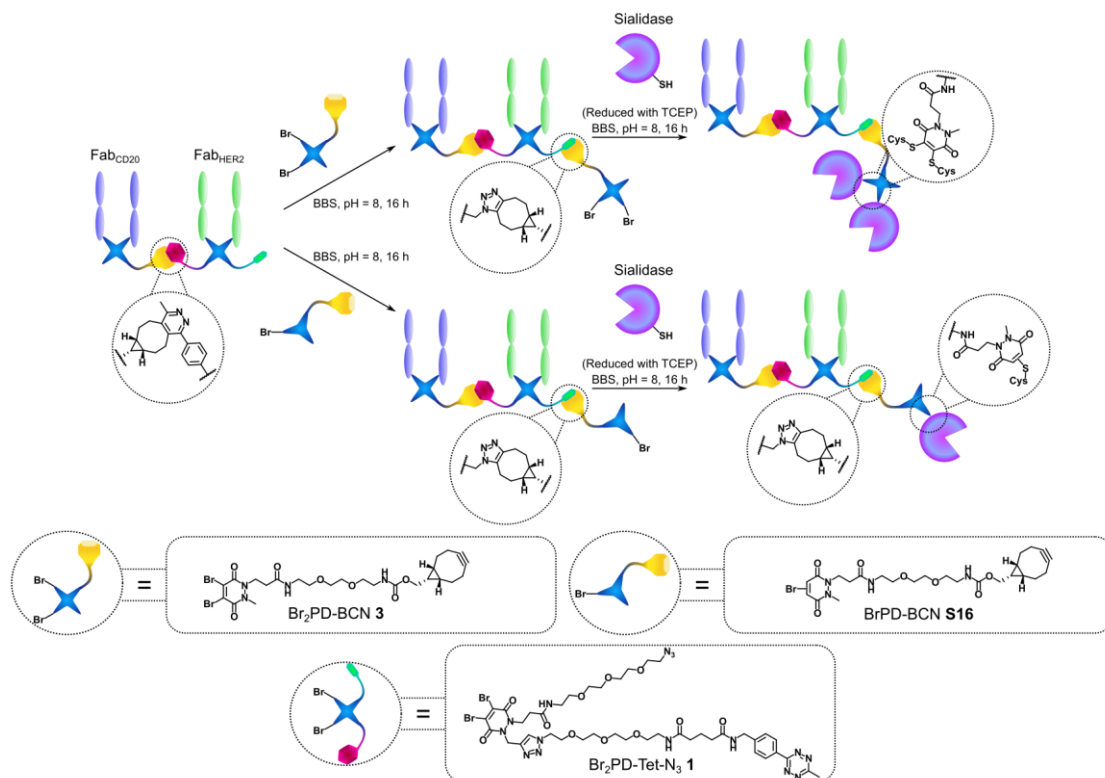

To a solution of Fab<sub>CD20</sub>-Fab<sub>HER2</sub>-N<sub>3</sub> **S31** (300  $\mu$ L, 33.3  $\mu$ M, 10 nmol, 1 eq.) in protein A binding buffer on a protein A column was added Br<sub>2</sub>PD-BCN **3** or BrPD-BCN **S16** (5  $\mu$ L, 20 mM in DMSO) and the mixture incubated at 30  $^{\circ}$ C for 16 h. After this time the excess Br<sub>2</sub>PD-BCN **3** or BrPD-BCN **S16** was eluted (3  $\times$  400  $\mu$ L protein A binding buffer). To the Fab<sub>CD20</sub>-Fab<sub>HER2</sub>-PDBr<sub>2</sub> **S34** or Fab<sub>CD20</sub>-Fab<sub>HER2</sub>-PDBr **S35** conjugate on the resin, was added reduced sialidase (400  $\mu$ L, 50  $\mu$ M, 20 nmol, 2 eq.) in protein A binding buffer, and the reaction mixture was incubated at 30  $^{\circ}$ C for 20 h. After this time, the excess sialidase was washed off (3  $\times$  400  $\mu$ L protein A binding buffer) and the bound fraction eluted (3  $\times$  400  $\mu$ L, 0.1 M glycine buffer pH 2.5, which was neutralised after elution with 10% (V/V) of a 1.5 M Tris, pH 8.8 solution). The eluted fractions were then combined, and buffer exchanged into PBS (10 mM phosphate, 2.7 mM KCl, 137 mM NaCl, pH 7.0, 1  $\times$  Zeba spin). The mixture was then purified by SEC. Representative yield: 6% Fab<sub>CD20</sub>-Fab<sub>HER2</sub>-Sia **S36** (from Fab<sub>CD20</sub>-Fab<sub>HER2</sub>-N<sub>3</sub> **S31**), 4% Fab<sub>CD20</sub>-Fab<sub>HER2</sub>-Sia **S37** (from Fab<sub>HER2</sub>-BCN 10).



### 8.3.15. Preparation of the Fab<sub>HER2</sub>-Sia-biotin conjugate **11** via SPIEDAC and SPAAC

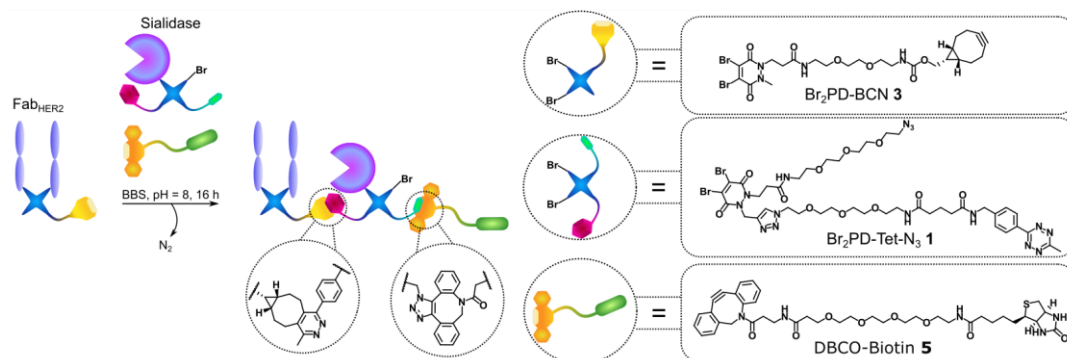

To a solution of Fab<sub>HER2</sub>-BCN **10** (95  $\mu$ L, 116  $\mu$ M, 11.0 nmol, 1 eq.) in PBS (10 mM phosphate, 2.7 mM KCl, 137 mM NaCl, pH 7.0) was added Sia-Tet-N<sub>3</sub> **8** (87.6  $\mu$ L, 168  $\mu$ M, 14.7 nmol, 1.34 eq.) and DBCO-PEG<sub>4</sub>-biotin **5** (3.7  $\mu$ L, 20 mM in DMSO, 74 nmol, 5 eq.) and the reaction mixture was incubated at 37 °C for 16 h under an Argon atmosphere. After this time, the mixture was purified by monomeric avidin agarose purification. Yield: 21% Fab<sub>HER2</sub>-Sia-biotin **11** (from Fab<sub>HER2</sub>-BCN **10**).

### 8.3.1. Preparation of Fab<sub>HER2</sub>-Fab<sub>CD3</sub>-Biotin **12** via SPAAC

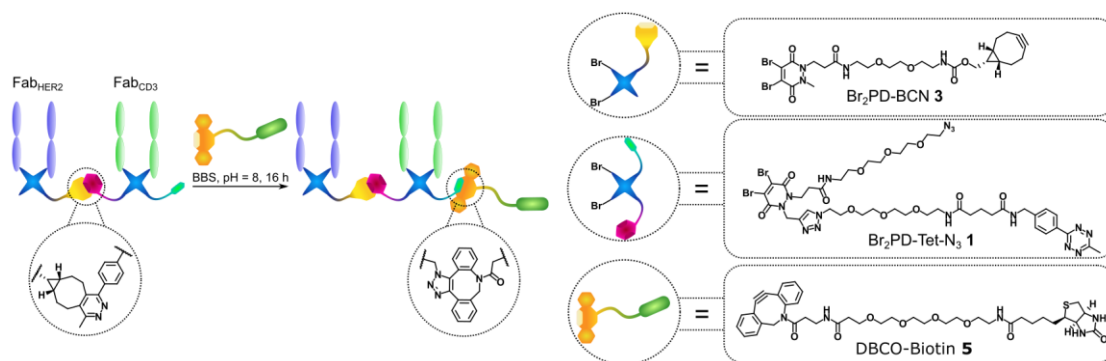

To a solution of purified Fab<sub>HER2</sub>-Fab<sub>CD3</sub>-N<sub>3</sub> **13** (100  $\mu$ L, 15.6  $\mu$ M, 1.56 nmol, 1 eq.) in BBS was added DBCO-PEG<sub>4</sub>-biotin **5** (0.8  $\mu$ L, 20 mM in DMSO, 15.6 nmol, 10 eq.) and the reaction mixture was incubated at 37 °C for 16 h under an Argon atmosphere. After this time the excess small molecule was removed by buffer exchange into BBS (1  $\times$  Zeba spin) to yield: 100% Fab<sub>HER2</sub>-Fab<sub>CD3</sub>-Biotin **12** (from purified Fab<sub>HER2</sub>-Fab<sub>CD3</sub>-N<sub>3</sub> **13**).



### 8.3.2. Preparation of the Fab<sub>HER2</sub>-(biotin)-Fab<sub>CD20</sub>-biotin conjugate **17** via SPIEDAC and SPAAC

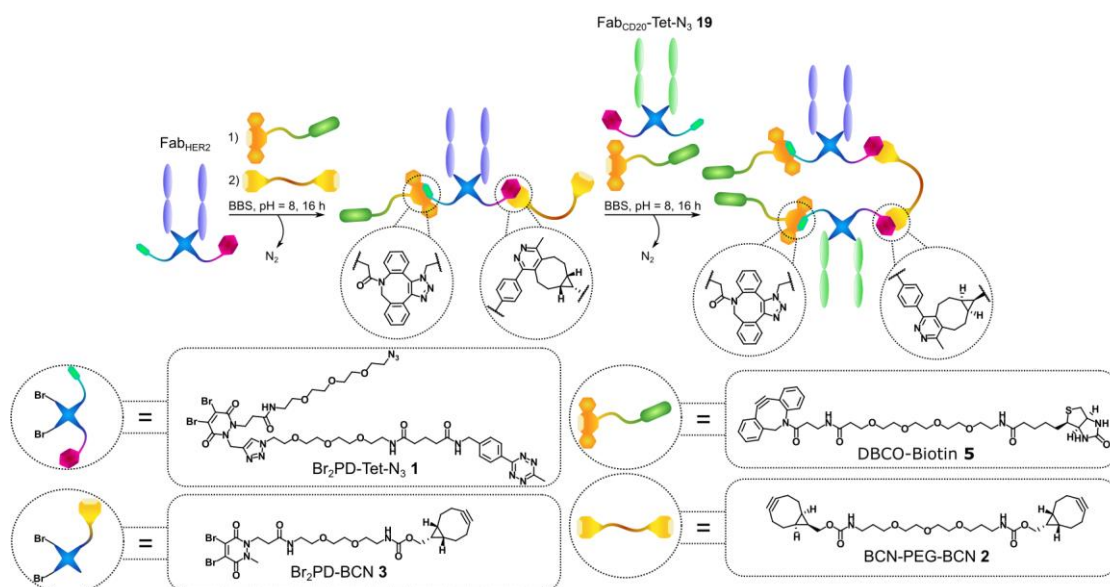

To a solution of Fab<sub>HER2</sub>-Tet-N<sub>3</sub> **15** (92  $\mu$ L, 130  $\mu$ M, 12.0 nmol, 1 eq.) in BBS was added DBCO-PEG<sub>4</sub>-Biotin **5** (6  $\mu$ L, 20 mM in DMSO, 120 nmol, 10 eq.) and the reaction mixture was incubated at 37  $^{\circ}$ C for 1 h to generate Fab<sub>HER2</sub>-Tet-Biotin **16**.

After this time, a dilute solution of BCN-PEG-BCN **2** was prepared by slowly adding BCN-PEG-BCN **2** (60  $\mu$ L, 4 mM in DMSO, 240 nmol, 20 eq.) to BBS (400  $\mu$ L) to avoid precipitation. To this solution was added the reaction mixture containing Fab<sub>HER2</sub>-Tet-Biotin **16** and the reaction mixture was incubated at 37  $^{\circ}$ C for 5 h and then at 0  $^{\circ}$ C for 11 h under an Argon atmosphere to yield, after removal of excess small molecule (1  $\times$  Viva spin, 1  $\times$  Zeba spin), Fab<sub>HER2</sub>-BCN-Biotin **18** (125  $\mu$ L, 60  $\mu$ M, 7.5 nmol, 63%).

To this solution was added Fab<sub>CD20</sub>-Tet-N<sub>3</sub> **19** (105  $\mu$ L, 51  $\mu$ M, 5.4 nmol, 0.7 eq.) and DBCO-PEG<sub>4</sub>-biotin **5** (4  $\mu$ L, 20 mM in DMSO, 80 nmol, 15 eq.), and the reaction mixture was incubated at 37  $^{\circ}$ C for 16 h under an Argon atmosphere. After this time, the mixture was purified by SEC. Yield: 14% Fab<sub>HER2</sub>-(biotin)-Fab<sub>CD20</sub>-biotin **17** (from Fab<sub>CD20</sub>-Tet-N<sub>3</sub> **19**).

### 8.3.3. Preparation of Fab<sub>x</sub>-Fab<sub>y</sub>-Sia-Biotin species

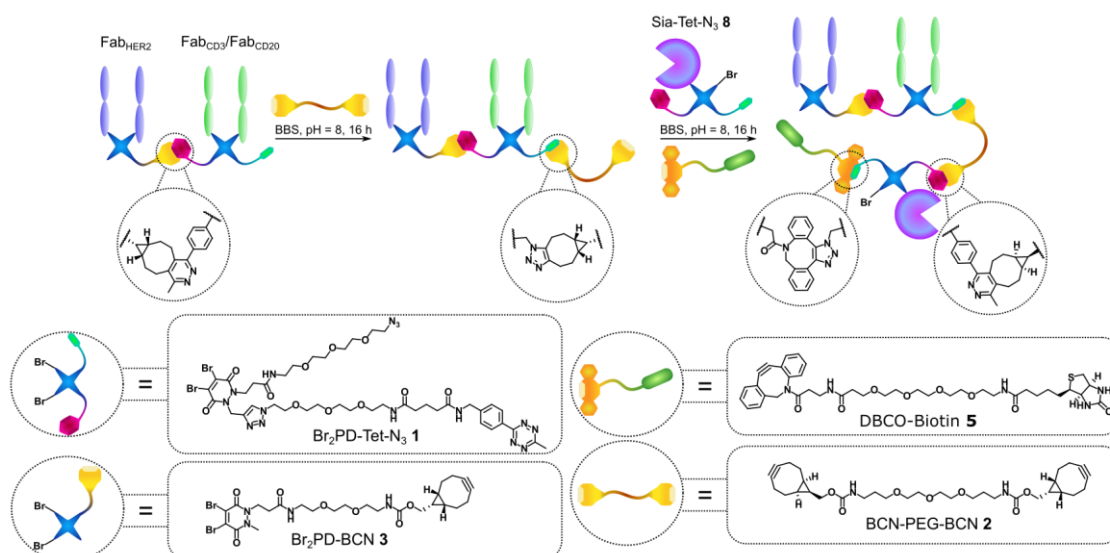

To a solution of Fab<sub>HER2</sub>-Fab<sub>CD20</sub>-N<sub>3</sub> **22** or Fab<sub>HER2</sub>-Fab<sub>CD3</sub>-N<sub>3</sub> **13** (100  $\mu$ L, 163  $\mu$ M, 16.3 nmol, 1 eq.) in acetate buffer (0.1 M, pH 5.0) was added BCN-PEG-BCN **2** (8.14  $\mu$ L, 20 mM in DMSO, 163 nmol, 10 eq.) and the mixture incubated at 30  $^{\circ}$ C for 6 h under an Argon atmosphere to generate Fab<sub>HER2</sub>-Fab<sub>CD20</sub>-BCN **23** or Fab<sub>HER2</sub>-Fab<sub>CD3</sub>-BCN **26**, respectively. After this time the excess small molecule was removed by buffer exchange into PBS (10 mM phosphate, 2.7 mM KCl, 137 mM NaCl, pH 7.0, 1  $\times$  Viva Spin, 1  $\times$  Zeba spin), followed by addition of Sia-Tet-N<sub>3</sub> **8** (100  $\mu$ L, 255  $\mu$ M, 25.5 nmol, 1.56 eq.) in PBS pH 7 and DBCO-PEG<sub>4</sub>-biotin **5** (6.38  $\mu$ L, 20 mM in DMSO, 128 nmol, 7.9 eq.), and the reaction mixture was incubated at 22  $^{\circ}$ C for 16 h under an Argon atmosphere. After this time the excess small molecule was removed by buffer exchange into PBS (10 mM phosphate, 2.7 mM KCl, 137 mM NaCl, pH 7.0, 1  $\times$  Zeba spin) and the mixture was purified by SEC. Representative yields: 11% Fab<sub>HER2</sub>-Fab<sub>CD20</sub>-Sia-Biotin **21** (from Fab<sub>HER2</sub>-BCN **10**), 6% Fab<sub>HER2</sub>-Fab<sub>CD3</sub>-Sia-Biotin **24** (from Fab<sub>HER2</sub>-BCN), 20% Fab<sub>HER2</sub>-Fab<sub>CD3</sub>-Sia-Biotin **24** (from purified Fab<sub>HER2</sub>-Fab<sub>CD3</sub>-N<sub>3</sub> **13**).

### 8.3.4. Preparation of Fab<sub>CD3</sub>-Fab<sub>HER2</sub>-Fab<sub>PD-1</sub>-Biotin **27**

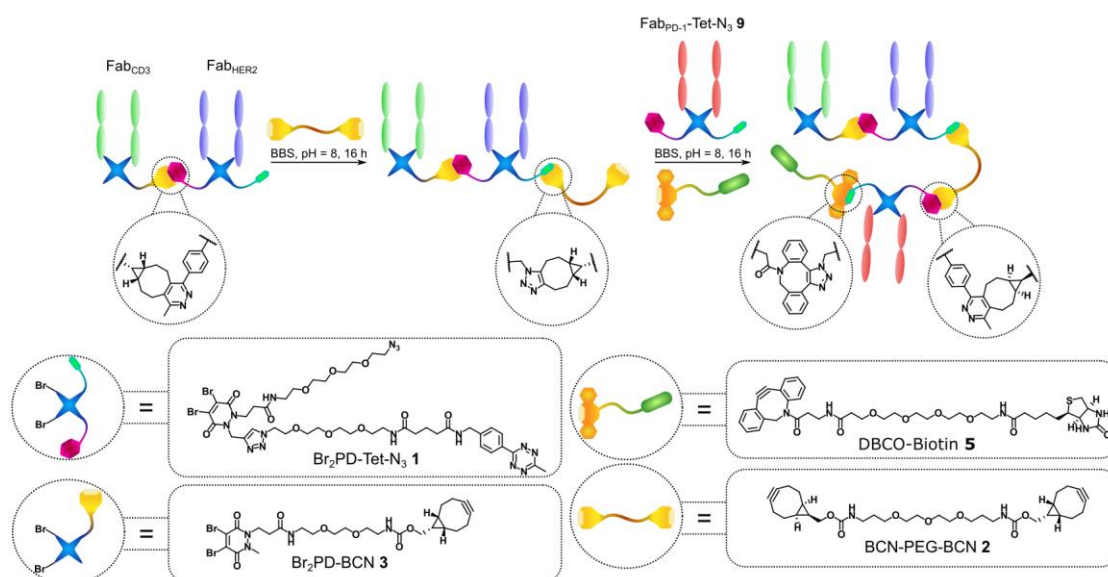

To BBS 350  $\mu$ L (25 mM borate, 25 mM NaCl, pH 8.0, 2 mM EDTA) was added dropwise BCN-PEG-BCN **2** (50  $\mu$ L, 4.2 mM in DMSO, 212 nmol, 20 eq.). To this solution was added Fab<sub>CD3</sub>-Fab<sub>HER2</sub>-N<sub>3</sub> **28** (115  $\mu$ L, 61.6  $\mu$ M, 7.1 nmol, 1 eq.) in BBS and the mixture incubated at 37 °C for 6 h. After this time, the excess small molecule was removed by buffer exchange into BBS (1  $\times$  Viva Spin, 1  $\times$  Zeba spin). To the resulting solution of Fab<sub>CD3</sub>-Fab<sub>HER2</sub>-BCN **29** (120  $\mu$ L, 40.1  $\mu$ M, 4.8 nmol) was added of Fab<sub>PD-1</sub>-Tet-N<sub>3</sub> **9** (120  $\mu$ L, 54.9  $\mu$ M, 6.6 nmol, 1.34 eq.) in BBS and DBCO-PEG<sub>4</sub>-biotin **5** (2.5  $\mu$ L, 20 mM in DMSO, 33 nmol, 6.7 eq.), and the reaction mixture was incubated at 37 °C for 20 h under an Argon atmosphere. After this time the excess small molecule was removed by buffer exchange into PBS (1  $\times$  Zeba spin), and the mixture was purified by SEC. Representative yield: 12% Fab<sub>CD3</sub>-Fab<sub>HER2</sub>-Fab<sub>PD-1</sub>-Biotin **27** (from Fab<sub>CD3</sub>-Fab<sub>HER2</sub>-N<sub>3</sub> **28**).

## 8.4. Cell Biology Section

### 8.4.1. Cell lines

SKBR3 (HTB-30™), HCC-1954 (CRL-2338™), BT-20 (HTB-19™), MDA-MB-468 (HTB-132™) and MDA-MB-231 (HTB-26™) cell lines were purchased from American Type Culture Collection and cultured in filtered Dulbecco's Modified Eagle's Medium/Nutrient Mixture F-12 Ham media with 10% heat-inactivated FBS and no added antibiotics or cultured as suggested. Cultures were grown in T25 and T75 flasks and maintained at 37 °C with 5% CO<sub>2</sub>. Where required, cells were induced for the expression of human PD-L1 by incubation with interferon gamma (IFN- $\gamma$ ) (PeproTech 300-02) at 100 ng/mL for 48 h and lifted with Enzyme Free Cell Dissociation Solution PBS Based (MilliporeSigma S-014-M) before flow cytometry and cytotoxicity assays.

### 8.4.2. Human blood

Leukoreduction system (LRS) chambers were obtained from healthy anonymous human donors who gave informed consent at the Stanford Blood Center. Tier 1 characteristics of human biospecimens reported according to BRISQ guidelines<sup>15</sup> as follows. Biospecimen type: white blood cell concentrate of TrimaAccel®

LRS chamber recovered after Plateletpheresis procedure. Product contains PBMCs, red blood cells, plasma, and negligible amount of anticoagulant (ACD-A). Anatomical or collection site: vein (venipuncture). Biospecimen disease status and clinical characteristics of patients: healthy donors, not routinely tested for infectious disease markers. Vital state: alive. Collection mechanism and parameters: blood draw and LRS filtration for platelet donation. Platelets are collected by TrimaAccel<sup>®</sup> machine, using a 17 gauge needle for the stick. RBCs were returned to the donor. Mechanism of stabilization: anticoagulant ACD-A. Type of long-term preservation: peripheral blood mononuclear cells (PBMCs) were separated from the LRS chambers using density gradient separation with Ficoll-Paque (GE Healthcare Life Sciences), biospecimens were frozen in FBS + 10% DMSO in liquid nitrogen. Constitution and concentration of fixative/preservation solution: heat inactivated foetal bovine serum (FBS) with 10% DMSO solution and frozen at -80 °C in an insulated cooler before being transferred to liquid nitrogen for long-term storage. Storage and shipping temperatures: LRS chambers were stored in a cooler for transport to the lab. Isolated PBMCs were stored in liquid nitrogen vapor (-196 °C). Storage duration: <1 day in LRS chamber. Duration varied as the units were collected at different times and sent to the lab in batches throughout the day, usually around 3-5 hours including drive time from the draw location to the lab. <2 years for frozen isolated PBMCs. Composition assessment and selection: none.

#### 8.4.3. Binding and Desialylation with Flow Cytometry

Flow Cytometry experiments were performed on a MACSQuant<sup>®</sup> Analyzer 10 Flow Cytometer (Miltenyi Biotec) and analyzed using FlowJo, version 10.8.1. Cells were stained with either Zombie NIR (Biolegend 423106) or Zombie Violet (Biolegend 423113) Fixable Viability Kits according to manufacturer protocols and fixed with 4% Paraformaldehyde (Ted Pella 18505) prior to analysis. Washing and staining were performed in PBS with 0.5% BSA. Binding was determined by incubating the constructs with 100,000 cells for 30 min at 4 °C, followed by incubating with Streptavidin Alexa Fluor™ 647 conjugate (ThermoFisher S21374, 1:2000 dilution) for 30 min at 4 °C. Desialylation activity was determined by incubating cells for 30 min at 37 °C with the constructs, then detecting binding with a 1:1 molar mixture of recombinant Human Siglec-9 Fc (R&D Systems 1139-SL-050, 2 µg/mL) and rabbit IgG Alexa Flour 488-conjugated antibody (R&D Systems IC1051G, 1:375 dilution). Data points were normalized to the maximum mean fluorescence intensity.

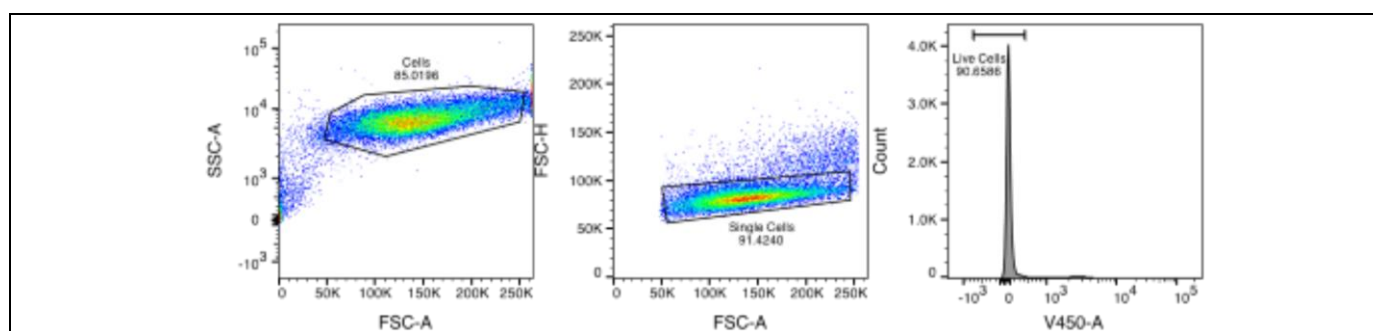

Figure 4 | Representative flow cytometry gating.

| Gating was performed using FlowJo software to eliminate debris (forward versus side scatter (FSC/SSC)) to analyze single cells (FSC-A/FSC-H), and to analyze live cells with either Zombie NIR (Biolegend 423106) or Zombie Violet (Biolegend 423113) Fixable Viability Kits.

#### 8.4.4. T-cell isolation procedure and activation

LRS chambers were obtained from healthy human donors from the Stanford Blood Bank. Peripheral blood mononuclear cells (PBMC) were separated from the chambers using density gradient separation with Ficoll-Paque (GE Healthcare Life Sciences). T cells were isolated using immunomagnetic negative selection EasySep™ Human T Cell Isolation Kit StemCell (STEMCELL Technologies, 17951) followed by activation for 5 days with human T-Activator CD3/CD28 Dynabeads™ (ThermoFisher, 11131D) and 30 IU/mL recombinant human Interleukin-2 (IL-2) (PeproTech, 200-02). For binding and desialylation experiments T cells from a separate donor were used for each replicate. For the cytotoxicity assay T cells from a single donor were used for all replicates.

#### 8.4.5. Cytotoxicity assay

BiTE induced cellular toxicity was determined by lactate dehydrogenase (LDH) release with CyQUANT LDH Cytotoxicity Assay (ThermoFisher, C20300). 20,000 activated T cells were incubated with 10,000 target cells in the presence of constructs at various concentrations in 96-well plates. After 24 h at 37 °C, the supernatant from the co-incubation was measured using SpectraMax i3x (Molecular Devices) and SoftMax Pro 6.4.2. Specific killing was determined following the manufacturer's protocol.

#### 8.4.6. Statistical analysis

Statistical analysis carried out with two-way ANOVA followed by post-hoc Tukey's or Šídák's multiple comparisons tests with multiplicity-adjusted P values with  $\alpha = 0.05$  in GraphPad Prism version 9. \*P < 0.05, \*\*P < 0.01, \*\*\*P < 0.001, \*\*\*\*P < 0.0001. Curves fitted with non-linear regression in GraphPad Prism version 9 with the following models: [Agonist] vs response (three parameters), One-site – Specific

binding, [Inhibitor] vs response (three parameters), [Agonist] vs response (three parameters). Best model identified with Prism's method-comparison function for each dataset.

**Table 3 | Two-way ANOVA table for Cytotoxicity assay of Fab<sub>HER2</sub>-Fab<sub>CD3</sub>-Sia-Biotin CiTE 24 and Fab<sub>CD3</sub>-Fab<sub>HER2</sub>-Fab<sub>PD-1</sub>-Biotin CiTE 27.**

**A**

| Two-way ANOVA for BiTE vs CiTE cell-kill assay on MDA-MB-231 cells |                      |         |                 |                   |          | Ordinary |
|--------------------------------------------------------------------|----------------------|---------|-----------------|-------------------|----------|----------|
| Alpha                                                              |                      |         |                 |                   |          | 0.05     |
| Source of Variation                                                | % of total variation | P value | P value summary | Significant?      |          |          |
| Interaction                                                        | 4.377                | 0.0023  | **              | Yes               |          |          |
| Concentration                                                      | 74.92                | <0.0001 | ****            | Yes               |          |          |
| Construct                                                          | 17.08                | <0.0001 | ****            | Yes               |          |          |
| ANOVA table                                                        | SS                   | DF      | MS              | F (DFn, DFd)      | P value  |          |
| Interaction                                                        | 115.9                | 6       | 19.31           | F (6, 24) = 4.828 | P=0.0023 |          |
| Concentration                                                      | 1983                 | 3       | 661             | F (3, 24) = 165.3 | P<0.0001 |          |
| Construct                                                          | 452                  | 2       | 223             | F (2, 24) = 56.51 | P<0.0001 |          |
| Residual                                                           | 95.99                | 24      | 3.999           |                   |          |          |
| Data summary                                                       |                      |         |                 |                   |          |          |
| Number of columns (Construct)                                      |                      |         |                 |                   |          | 3        |
| Number of rows (Concentration)                                     |                      |         |                 |                   |          | 4        |
| Number of values                                                   |                      |         |                 |                   |          | 36       |

**B**

| Two-way ANOVA for BiTE vs CiTE cell-kill assay on MDA-MB-231 cells activated with INF-γ |                      |         |                 |                   |          | Ordinary |
|-----------------------------------------------------------------------------------------|----------------------|---------|-----------------|-------------------|----------|----------|
| Alpha                                                                                   |                      |         |                 |                   |          | 0.05     |
| Source of Variation                                                                     | % of total variation | P value | P value summary | Significant?      |          |          |
| Interaction                                                                             | 15.89                | <0.0001 | ****            | Yes               |          |          |
| Concentration                                                                           | 65.62                | <0.0001 | ****            | Yes               |          |          |
| Construct                                                                               | 16.8                 | <0.0001 | ****            | Yes               |          |          |
| ANOVA table                                                                             | SS                   | DF      | MS              | F (DFn, DFd)      | P value  |          |
| Interaction                                                                             | 429.2                | 6       | 71.69           | F (6, 24) = 37.50 | P<0.0001 |          |
| Concentration                                                                           | 1776                 | 3       | 592             | F (3, 24) = 299.7 | P<0.0001 |          |
| Construct                                                                               | 454.7                | 2       | 226.3           | F (2, 24) = 118.9 | P<0.0001 |          |
| Residual                                                                                | 45.88                | 24      | 1.912           |                   |          |          |
| Data summary                                                                            |                      |         |                 |                   |          |          |
| Number of columns (Construct)                                                           |                      |         |                 |                   |          | 3        |
| Number of rows (Concentration)                                                          |                      |         |                 |                   |          | 4        |
| Number of values                                                                        |                      |         |                 |                   |          | 36       |

**A**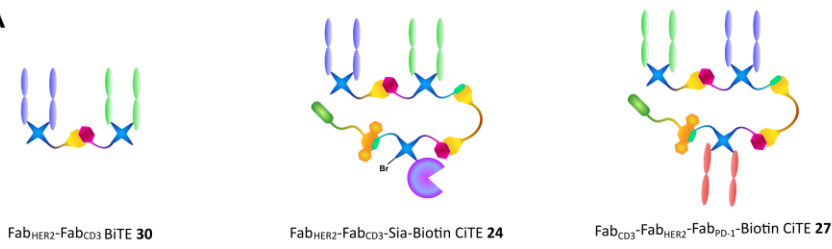**B** Killing of MDA-MB-231 cells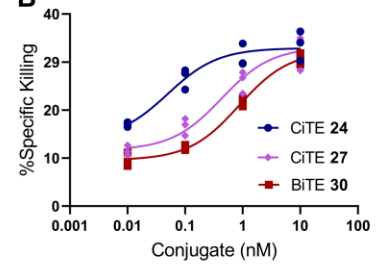**C** Killing of MDA-MB-231 cells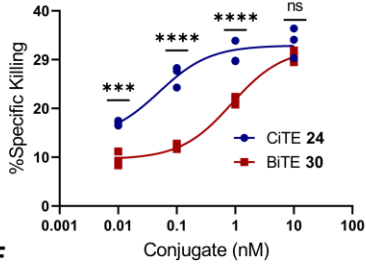**D** Killing of MDA-MB-231 cells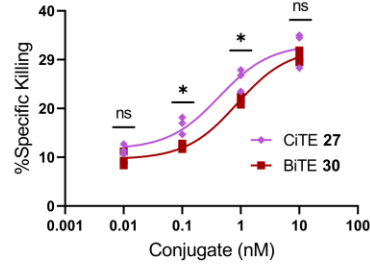**E** Killing of MDA-MB-231 cells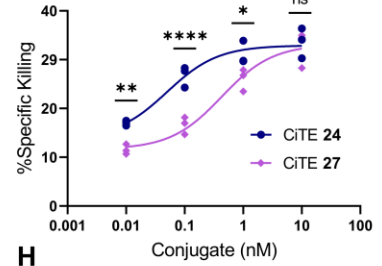**F**

| Post-hoc multiple comparisons table for BITE vs CITE cell-kill assay on MDA-MB-231 cells |                          |              |
|------------------------------------------------------------------------------------------|--------------------------|--------------|
| No induction of MDA-MB-231 PD-L1 expression                                              |                          |              |
| BITE 30 vs CITE 24                                                                       |                          |              |
| Concentration                                                                            | Tukey's adjusted P value | Significance |
| 0.01 nM                                                                                  | 0.0004                   | ***          |
| 0.1 nM                                                                                   | <0.0001                  | ****         |
| 1 nM                                                                                     | <0.0001                  | ****         |
| 10 nM                                                                                    | 0.1791                   | ns           |

**G**

| Post-hoc multiple comparisons table for BITE vs CITE cell-kill assay on MDA-MB-231 cells |                          |              |
|------------------------------------------------------------------------------------------|--------------------------|--------------|
| No induction of MDA-MB-231 PD-L1 expression                                              |                          |              |
| BITE 30 vs CITE 27                                                                       |                          |              |
| Concentration                                                                            | Tukey's adjusted P value | Significance |
| 0.01 nM                                                                                  | 0.4621                   | ns           |
| 0.1 nM                                                                                   | 0.0342                   | *            |
| 1 nM                                                                                     | 0.0342                   | *            |
| 10 nM                                                                                    | 0.4505                   | ns           |

**H**

| Post-hoc multiple comparisons table for BITE vs CITE cell-kill assay on MDA-MB-231 cells |                          |              |
|------------------------------------------------------------------------------------------|--------------------------|--------------|
| No induction of MDA-MB-231 PD-L1 expression                                              |                          |              |
| CITE 24 vs CITE 27                                                                       |                          |              |
| Concentration                                                                            | Tukey's adjusted P value | Significance |
| 0.01 nM                                                                                  | 0.0076                   | **           |
| 0.1 nM                                                                                   | <0.0001                  | ****         |
| 1 nM                                                                                     | 0.013                    | *            |
| 10 nM                                                                                    | 0.8148                   | ns           |

**I**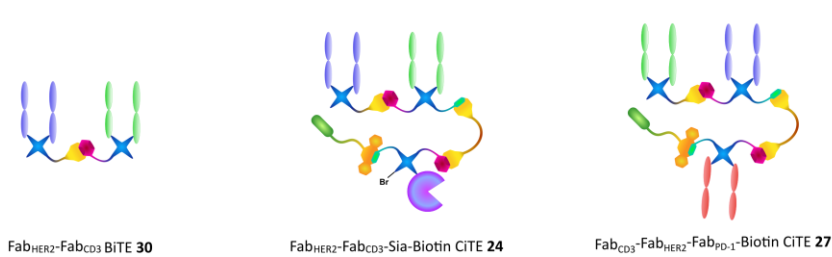**J** Killing of IFN-γ-activated MDA-MB-231 cells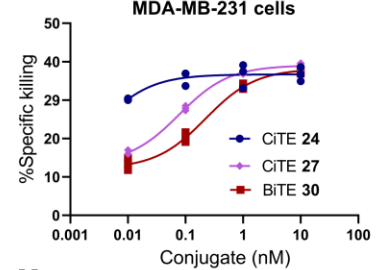**K** Killing of IFN-γ-activated MDA-MB-231 cells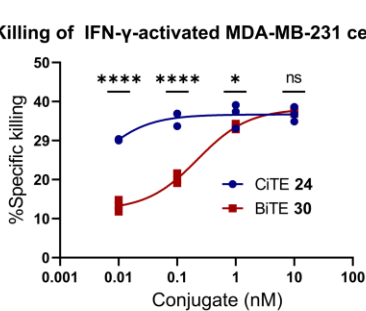**L** Killing of IFN-γ-activated MDA-MB-231 cells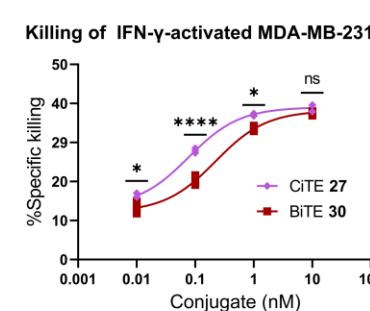**M** Killing of IFN-γ-activated MDA-MB-231 cells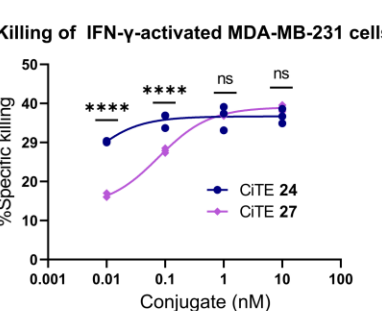**N**

| Post-hoc multiple comparisons table for BITE vs CITE cell-kill assay on MDA-MB-231 cells |                          |              |
|------------------------------------------------------------------------------------------|--------------------------|--------------|
| MDA-MB-231 PD-L1 expression induced with INF-γ                                           |                          |              |
| BITE 30 vs CITE 24                                                                       |                          |              |
| Concentration                                                                            | Tukey's adjusted P value | Significance |
| 0.01 nM                                                                                  | <0.0001                  | ****         |
| 0.1 nM                                                                                   | <0.0001                  | ****         |
| 1 nM                                                                                     | 0.0333                   | *            |
| 10 nM                                                                                    | 0.7435                   | ns           |

**O**

| Post-hoc multiple comparisons table for BITE vs CITE cell-kill assay on MDA-MB-231 cells |                          |              |
|------------------------------------------------------------------------------------------|--------------------------|--------------|
| MDA-MB-231 PD-L1 expression induced with INF-γ                                           |                          |              |
| BITE 30 vs CITE 27                                                                       |                          |              |
| Concentration                                                                            | Tukey's adjusted P value | Significance |
| 0.01 nM                                                                                  | 0.0333                   | *            |
| 0.1 nM                                                                                   | <0.0001                  | ****         |
| 1 nM                                                                                     | 0.0131                   | *            |
| 10 nM                                                                                    | 0.4255                   | ns           |

**P**

| Post-hoc multiple comparisons table for BITE vs CITE cell-kill assay on MDA-MB-231 cells |                          |              |
|------------------------------------------------------------------------------------------|--------------------------|--------------|
| MDA-MB-231 PD-L1 expression induced with INF-γ                                           |                          |              |
| CITE 24 vs CITE 27                                                                       |                          |              |
| Concentration                                                                            | Tukey's adjusted P value | Significance |
| 0.01 nM                                                                                  | <0.0001                  | ****         |
| 0.1 nM                                                                                   | <0.0001                  | ****         |
| 1 nM                                                                                     | 0.9105                   | ns           |
| 10 nM                                                                                    | 0.132                    | ns           |



**Figure 5 | Cytotoxicity assay of Fab<sub>HER2</sub>-Fab<sub>CD3</sub>-Sia-Biotin CiTE 24 and Fab<sub>CD3</sub>-Fab<sub>HER2</sub>-Fab<sub>PD-1</sub>-Biotin CiTE 27.** **A & I** | Structures of constructs used in assay. **B** | Cytotoxicity assay of Fab<sub>HER2</sub>-Fab<sub>CD3</sub>-Sia-Biotin CiTE 24 and Fab<sub>CD3</sub>-Fab<sub>HER2</sub>-Fab<sub>PD-1</sub>-Biotin CiTE 27. MDA-MB-231 cells were co-cultured with T cells (E:T ratio of 2:1) and treated with 0.01 – 10 nM of CiTE 24, CiTE 27 or BiTE 30. MDA-MB-231 viability was assessed 24 h following treatment *via* LDH assay. **C & F** | Comparison of cytotoxicity of CiTE 24 and BiTE 30 on MDA-MB-231 cells. **D & G** | Comparison of cytotoxicity of CiTE 27 and BiTE 30 on MDA-MB-231 cells. **E & H** | Comparison of cytotoxicity of CiTE 27 and CiTE 24 on MDA-MB-231 cells. **J** | Cytotoxicity assay of Fab<sub>HER2</sub>-Fab<sub>CD3</sub>-Sia-Biotin CiTE 24 and Fab<sub>CD3</sub>-Fab<sub>HER2</sub>-Fab<sub>PD-1</sub>-Biotin CiTE 27. MDA-MB-231 cells, pre-incubated with IFN- $\gamma$  to induce PD-L1 expression, were co-cultured with T cells (E:T ratio of 2:1) and treated with 0.01 – 10 nM of CiTE 24, CiTE 27 or BiTE 30. MDA-MB-231 viability was assessed 24 h following treatment *via* LDH assay. **K & N** | Comparison of cytotoxicity of CiTE 24 and BiTE 30, with IFN- $\gamma$ -activated MDA-MB-231 cells. **L & O** | Comparison of cytotoxicity of CiTE 27 and BiTE 30, with IFN- $\gamma$ -activated MDA-MB-231 cells. **M & P** | Comparison of cytotoxicity of CiTE 27 and CiTE 24, with IFN- $\gamma$ -activated MDA-MB-231 cells. | Statistical analysis carried out with two-way ANOVA followed by post-hoc Tukey's multiple comparisons test with multiplicity-adjusted P values with  $\alpha = 0.05$ . \*P < 0.05, \*\*P < 0.01, \*\*\*P < 0.001, \*\*\*\*P < 0.0001. Data represented as individual datapoints, from three replicates. Curves fitted with non-linear regression with the following model: [Agonist] vs response (three parameters).



## 9. NMR spectra

### 9.2. Compound **S1**, tert-butyl (4-cyanobenzyl)carbamate<sup>9</sup>

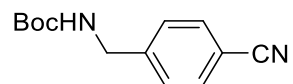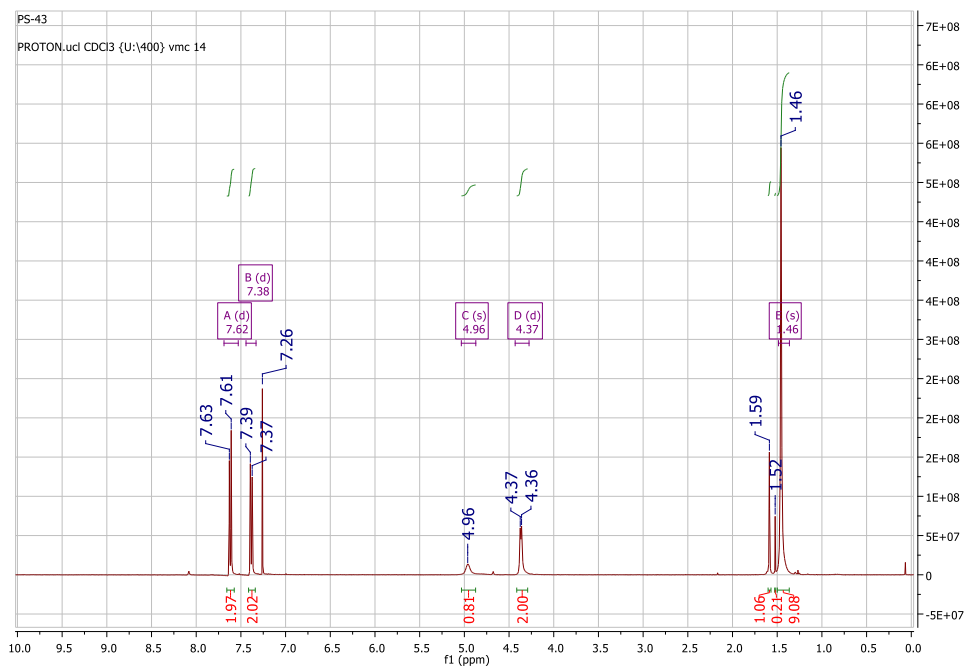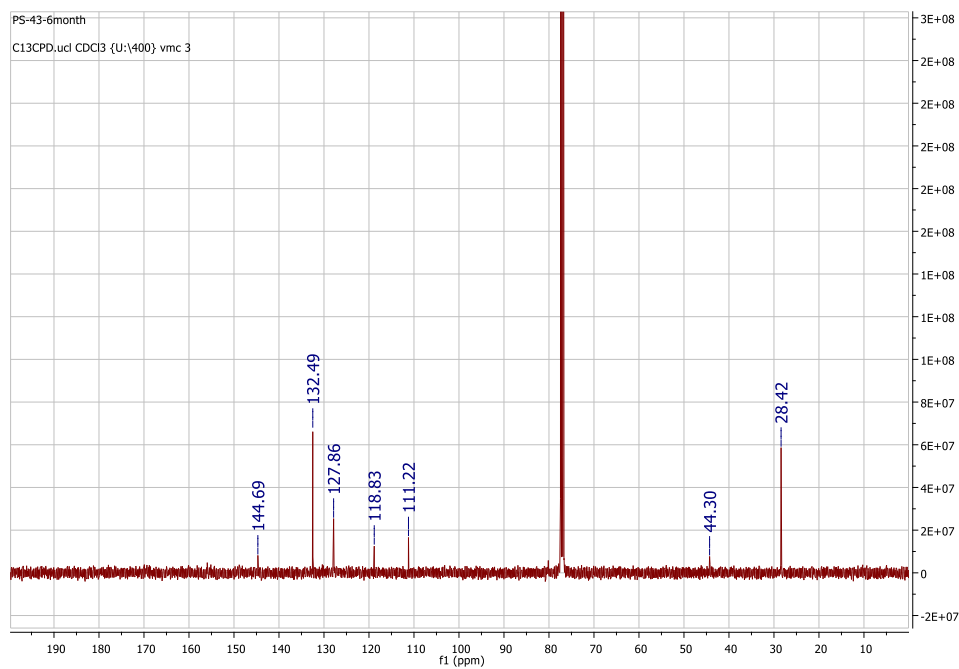

9.3. Compound **S2**, *tert*-butyl (4-(6-methyl-1,2,4,5-tetrazin-3-yl)benzyl)carbamate<sup>9</sup>

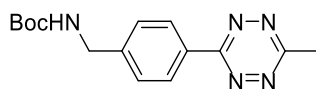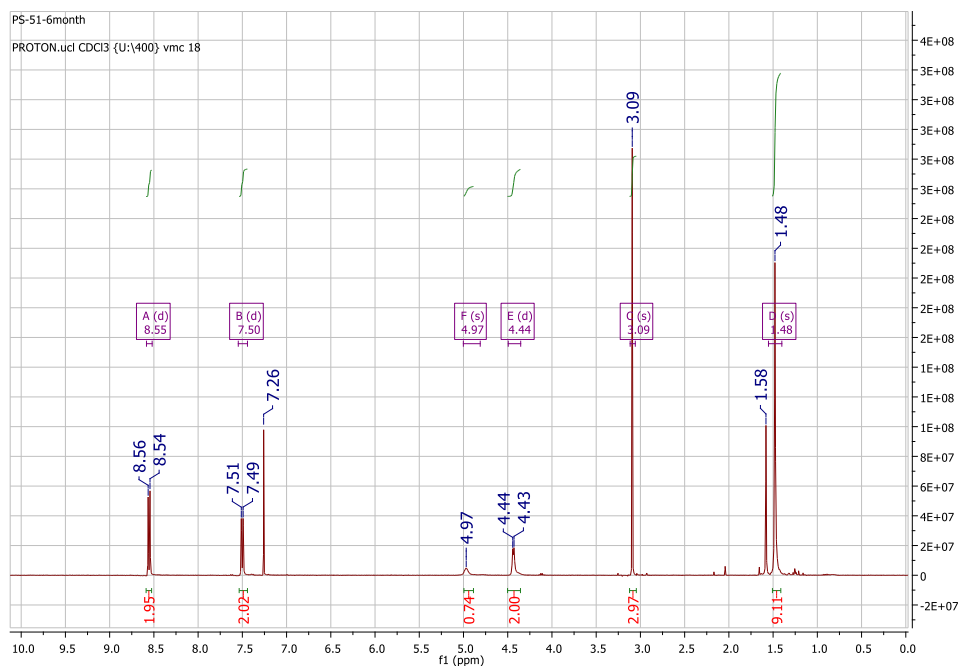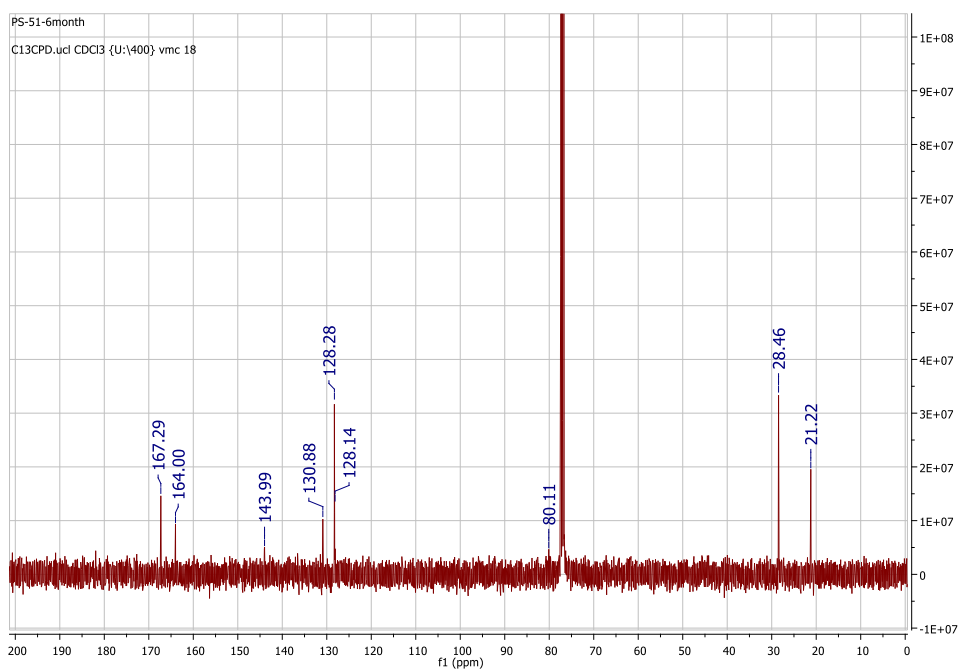

9.4. Compound **S3**, 5-((4-(6-methyl-1,2,4,5-tetrazin-3-yl)benzyl)amino)-5-oxopentanoic acid<sup>11</sup>

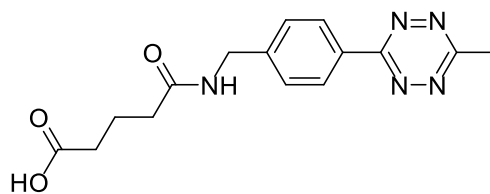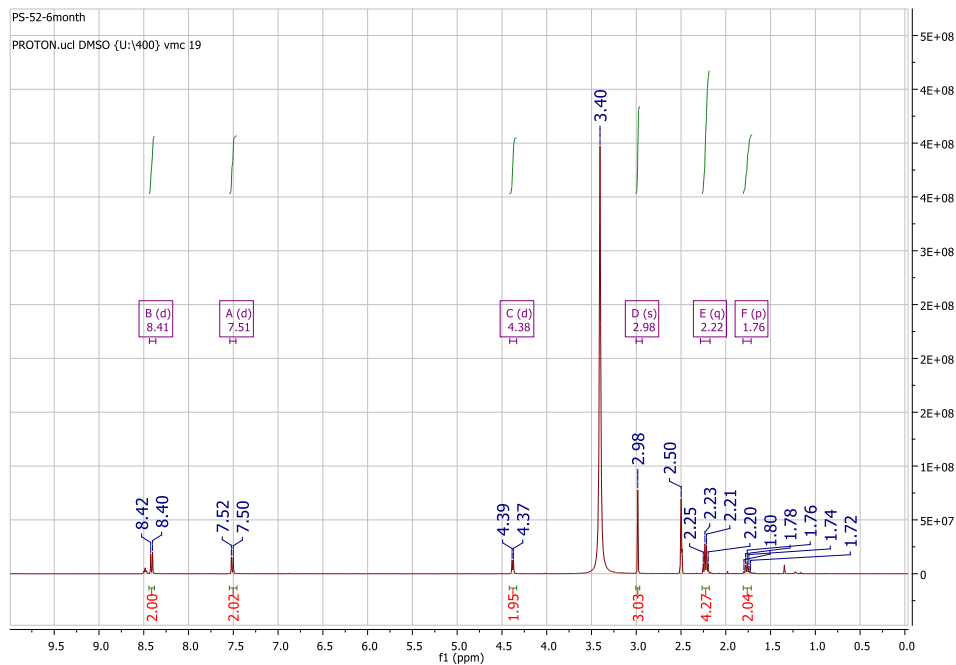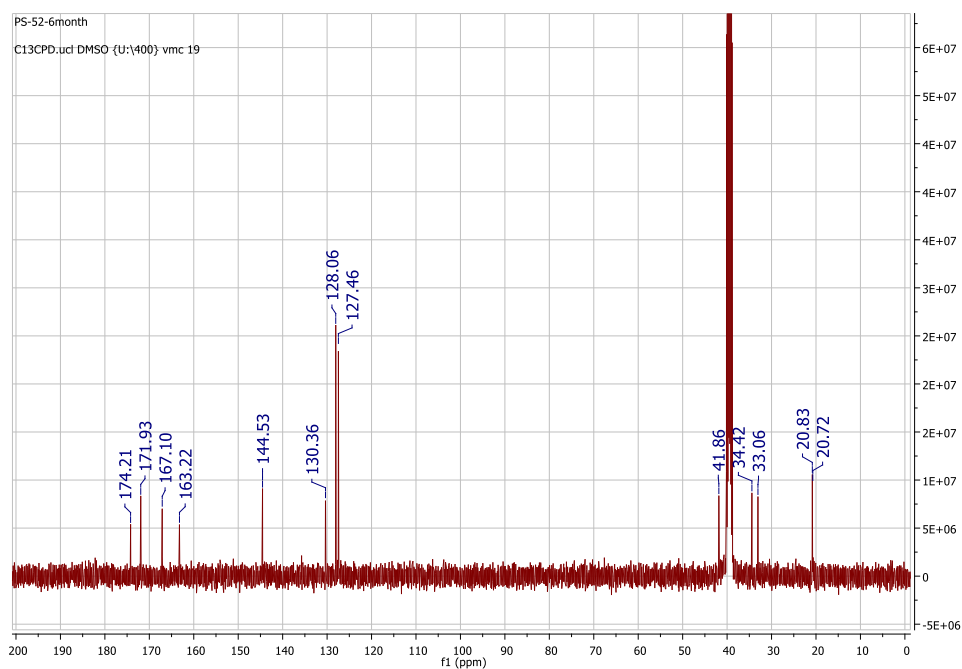

9.5. Compound **S4**,  $N^1$ -(3-(2-(2-(3-aminopropoxy)ethoxy)ethoxy)propyl)- $N^5$ -(4-(6-methyl-1,2,4,5-tetrazin-3-yl)benzyl)glutaramide<sup>12</sup>

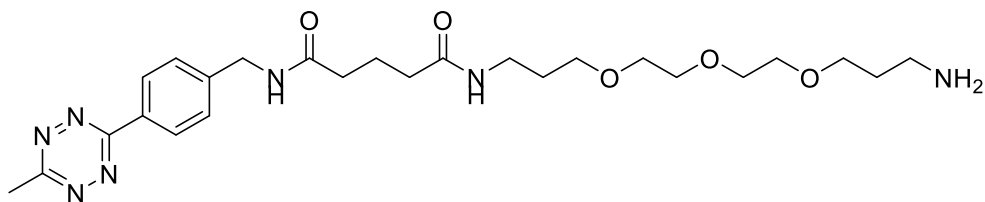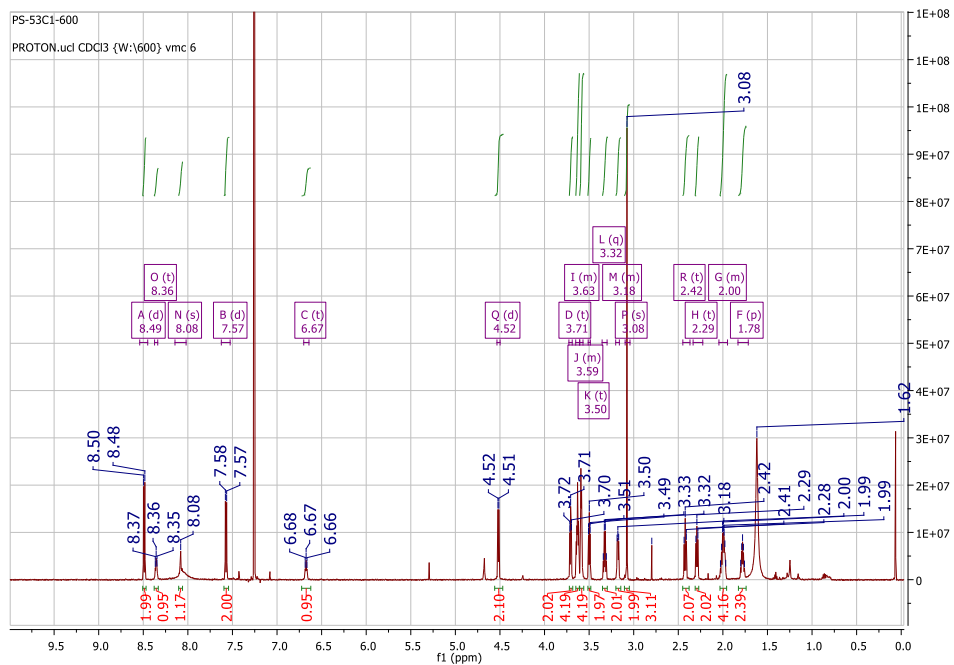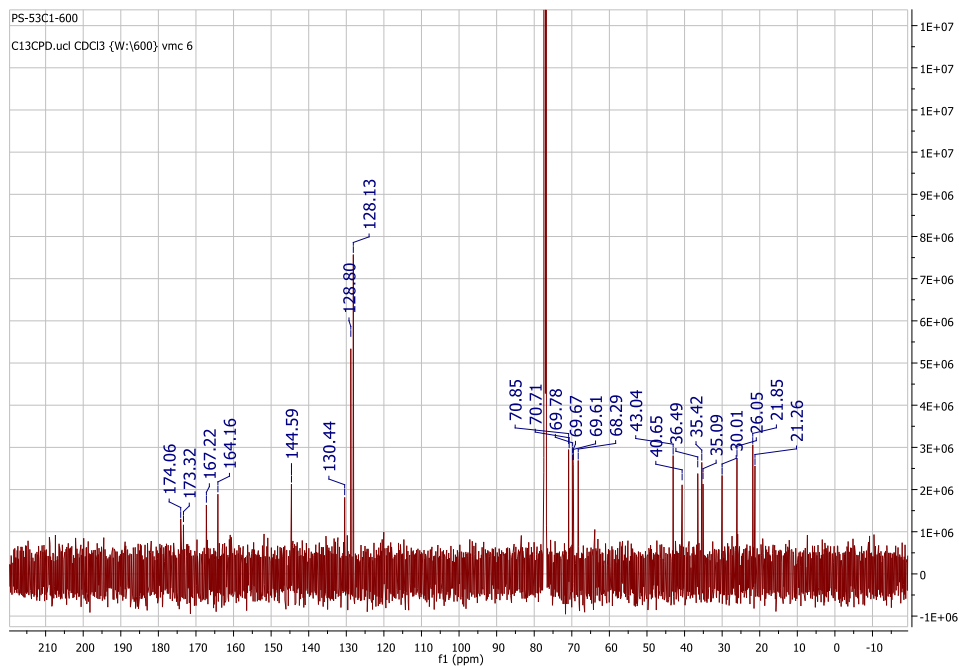

9.6. Compound **S5**, *N*<sup>1</sup>-(2-(2-(2-(2-azidoethoxy)ethoxy)ethoxy)ethyl)-*N*<sup>5</sup>-(4-(6-methyl-1,2,4,5-tetrazin-3-yl)benzyl)glutaramide<sup>3</sup>

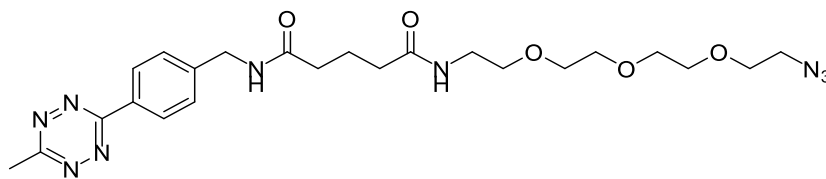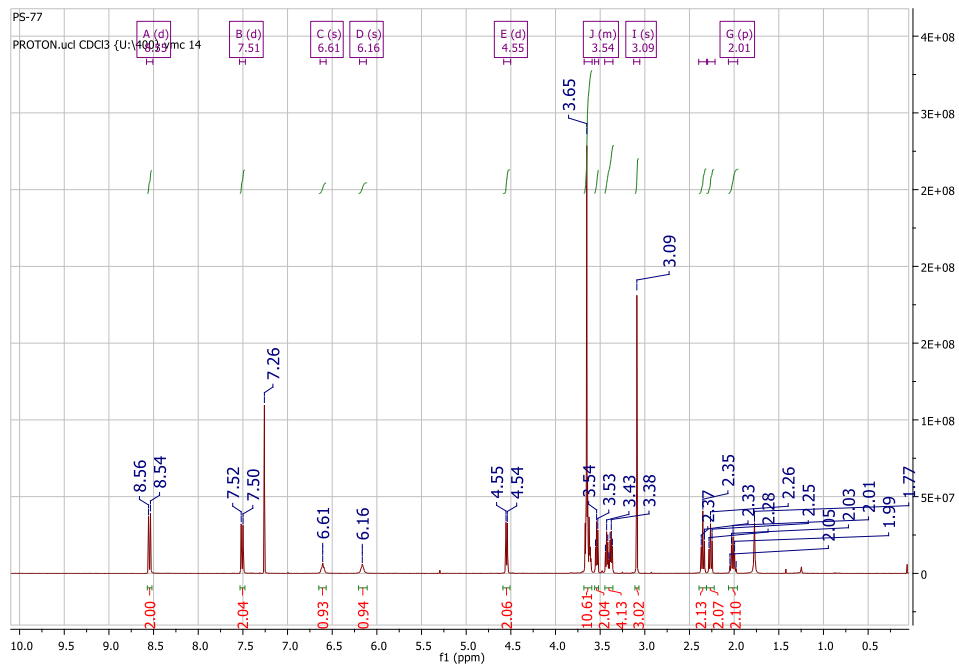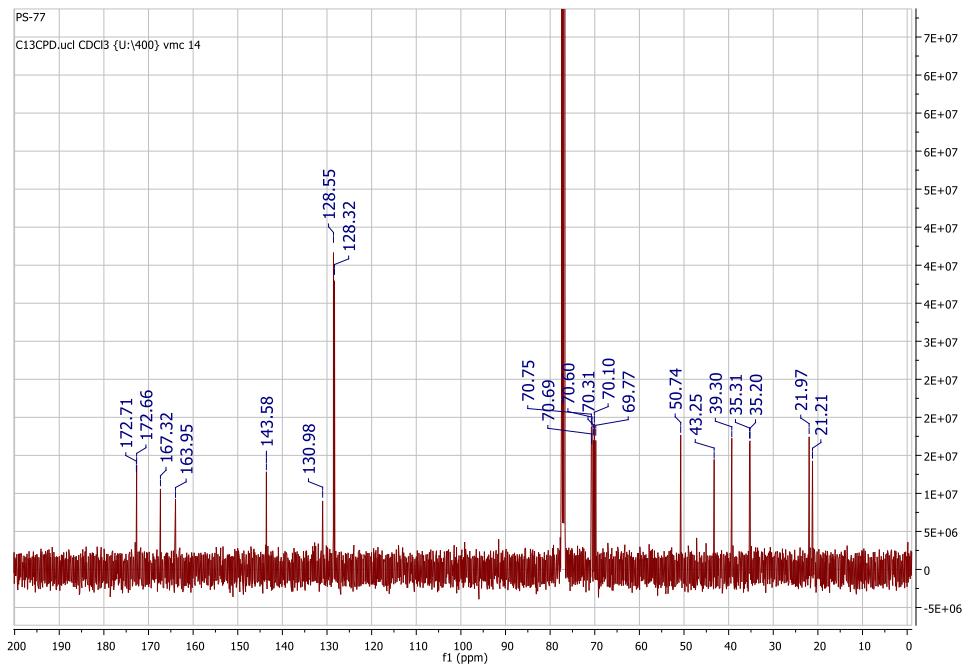



9.8. Compound **S7**, di-*tert*-butyl 1-(3-(*tert*-butoxy)-3-oxopropyl)-2-methylhydrazine-1,2-dicarboxylate<sup>2</sup>

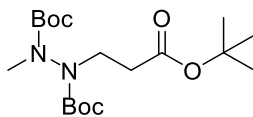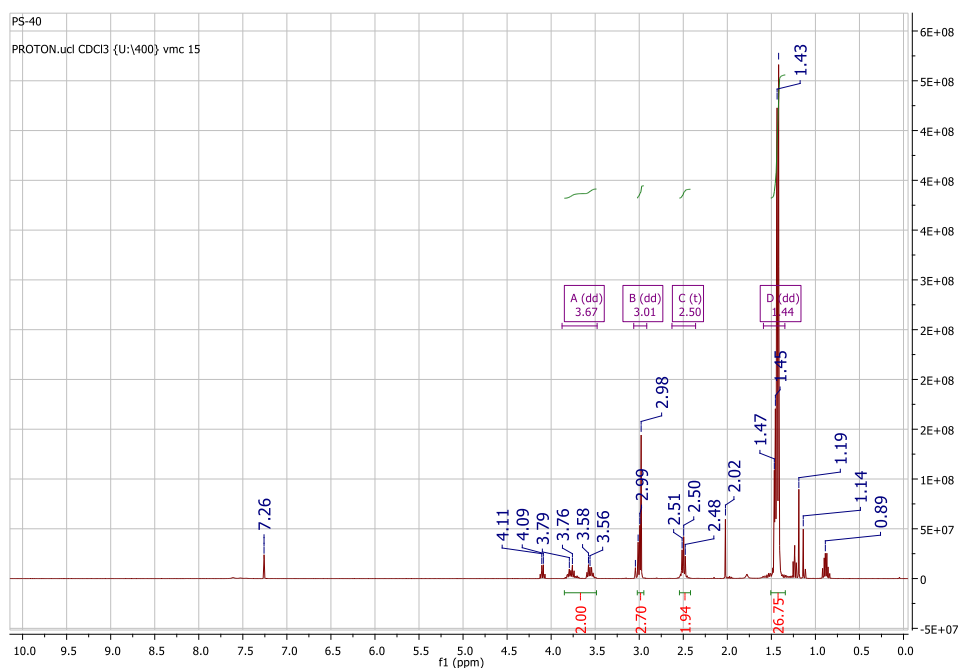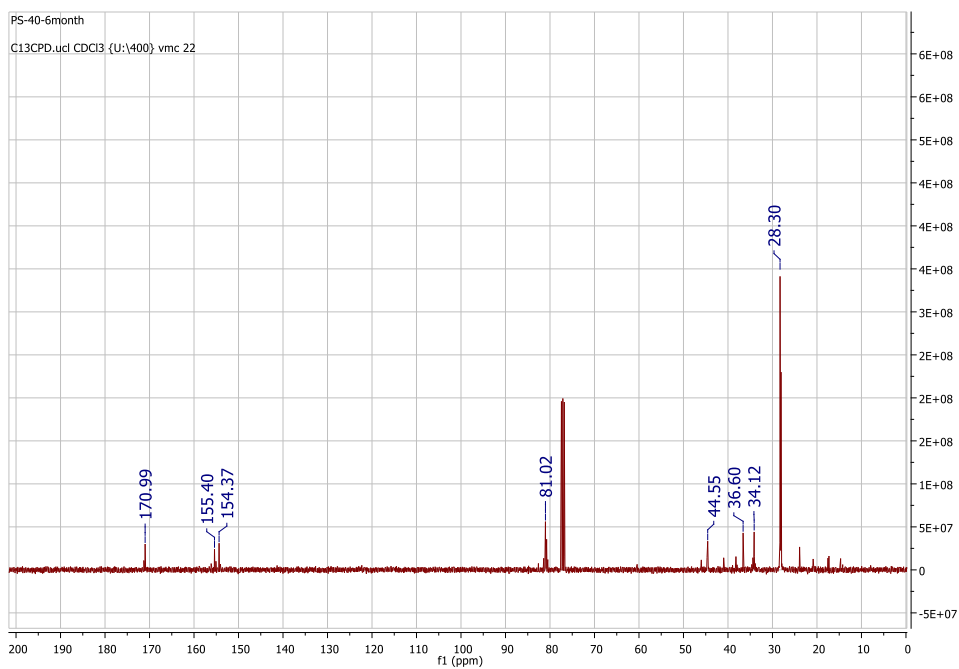

9.9. Compound **S8**, 3-(4,5-dibromo-2-methyl-3,6-dioxo-3,6-dihydropyridazin-1(2H)-yl)propanoic acid<sup>2</sup>

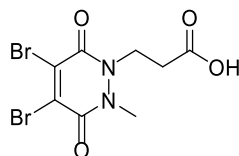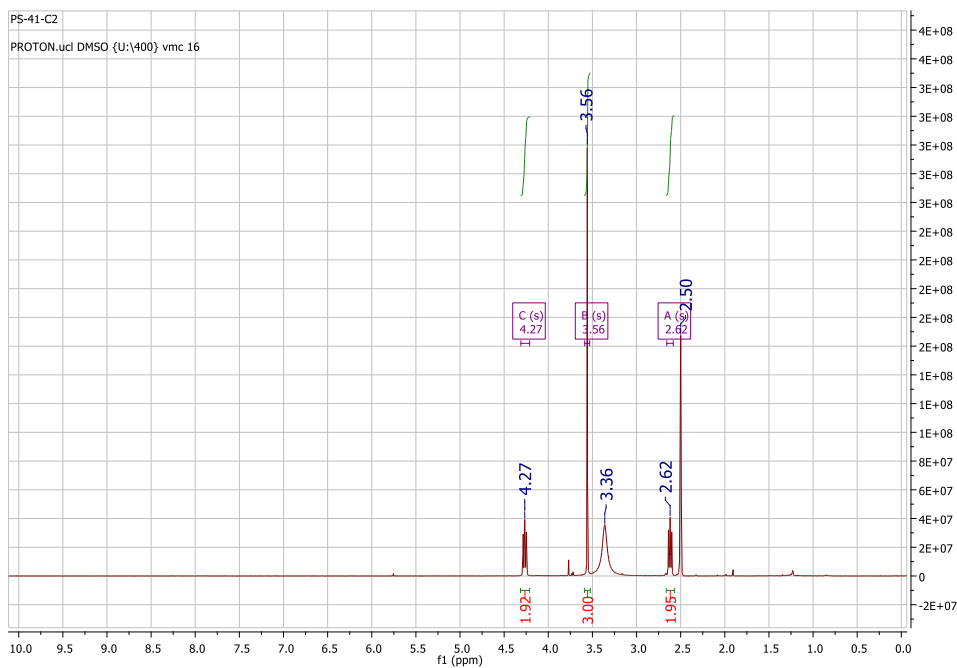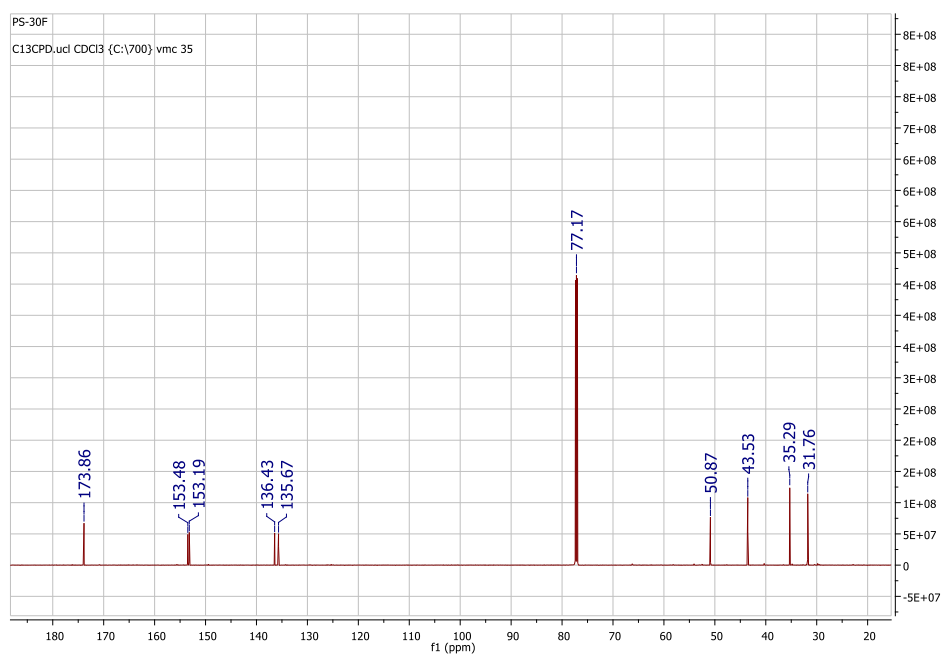



9.10. Compound **S9**, 2,5-dioxopyrrolidin-1-yl 3-(4,5-dibromo-2-methyl-3,6-dioxo-3,6-dihydropyridazin-1(2H)-yl)propanoate<sup>2</sup>

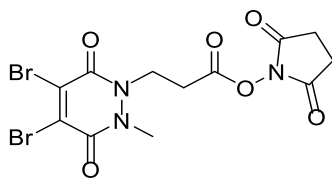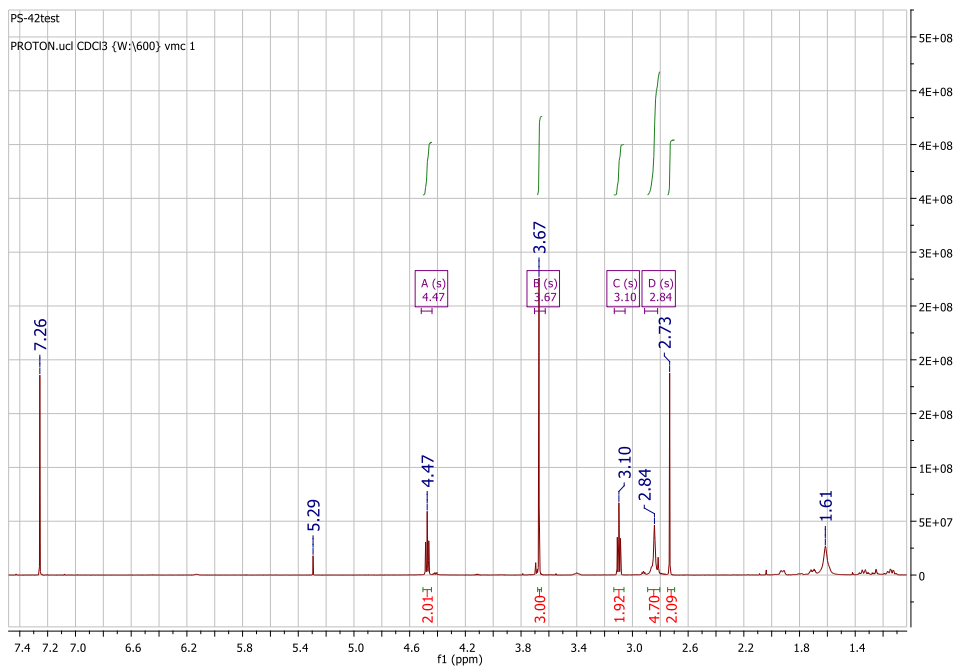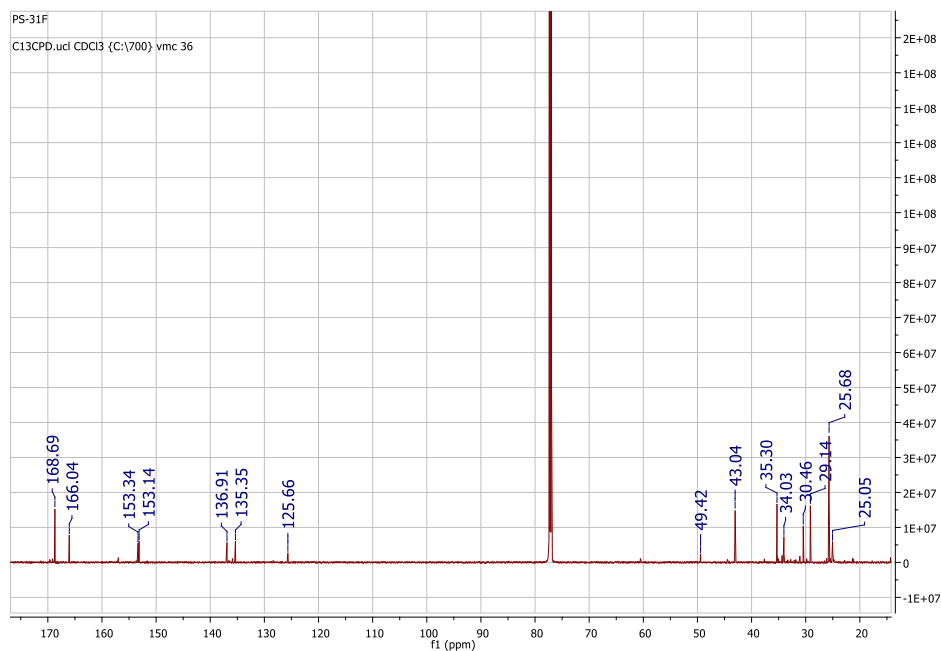

9.11. Compound 4,  $N^1$ -(17-(4,5-dibromo-2-methyl-3,6-dioxo-3,6-dihydropyridazin-1(2H)-yl)-15-oxo-4,7,10-trioxa-14-azaheptadecyl)- $N^5$ -(4-(6-methyl-1,2,4,5-tetrazin-3-yl)benzyl)glutaramide<sup>12</sup>

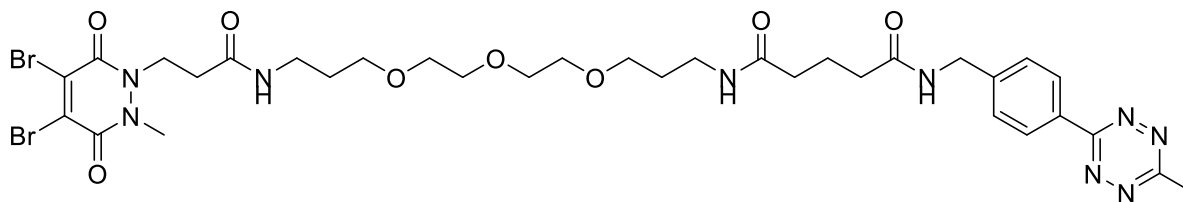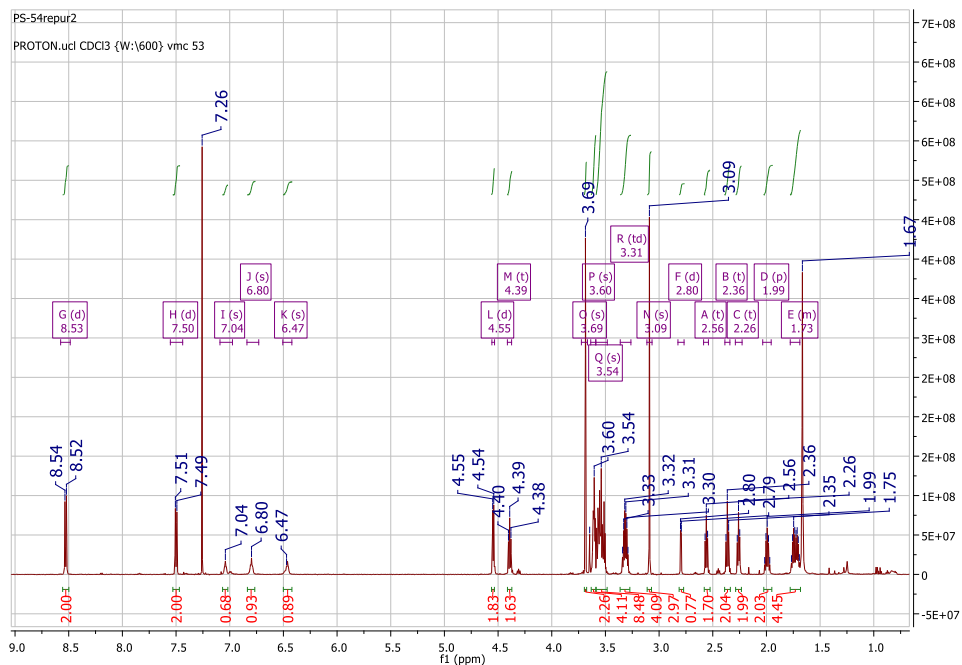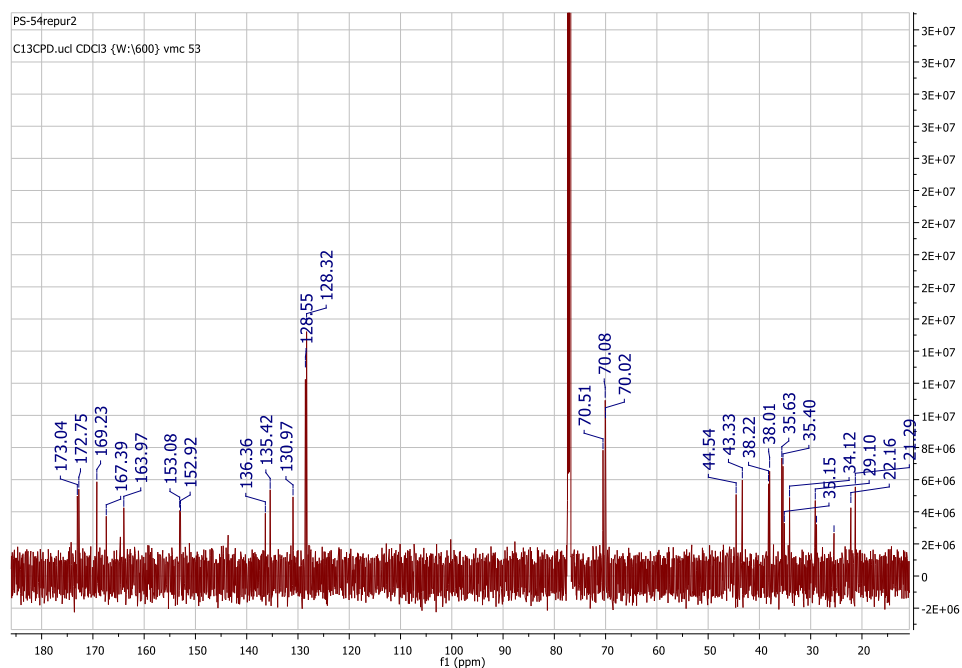

9.12. Compound **S10**, di-*tert*-butyl 1-(prop-2-yn-1-yl)hydrazine-1,2-dicarboxylate<sup>13</sup>

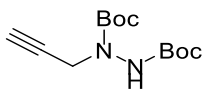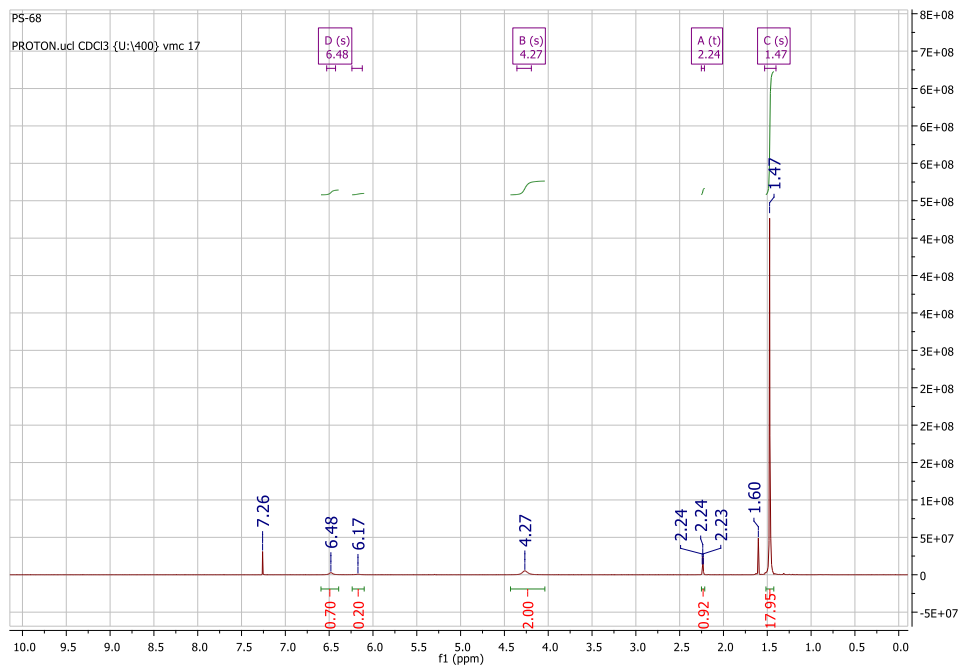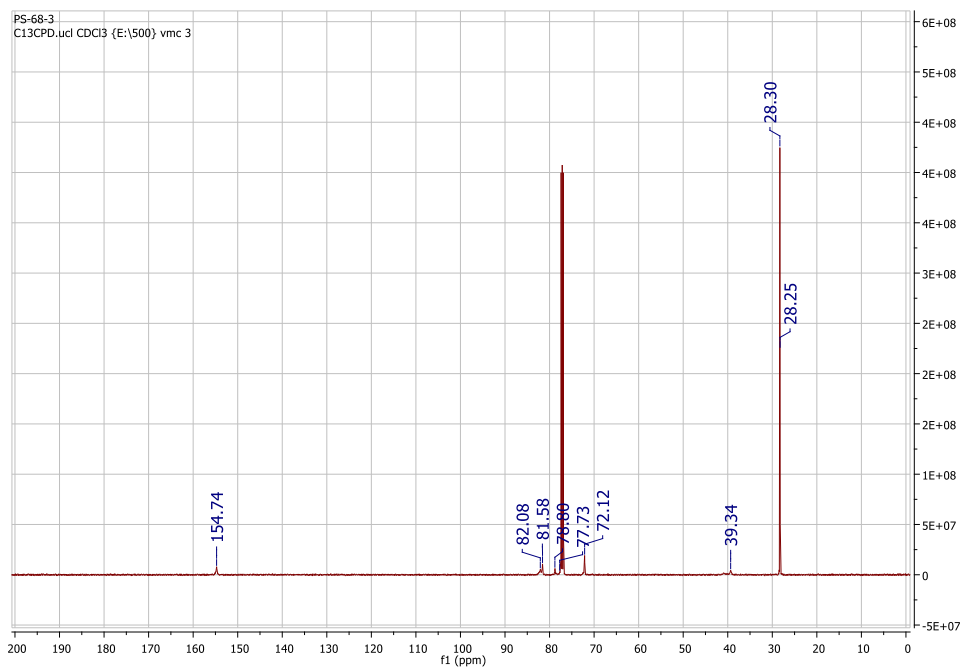

9.13. Compound **S11**, di-tert-butyl 1-(3-(tert-butoxy)-3-oxopropyl)-2-(prop-2-yn-1-yl)hydrazine-1,2-dicarboxylate<sup>3</sup>

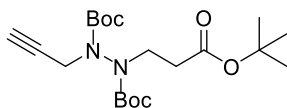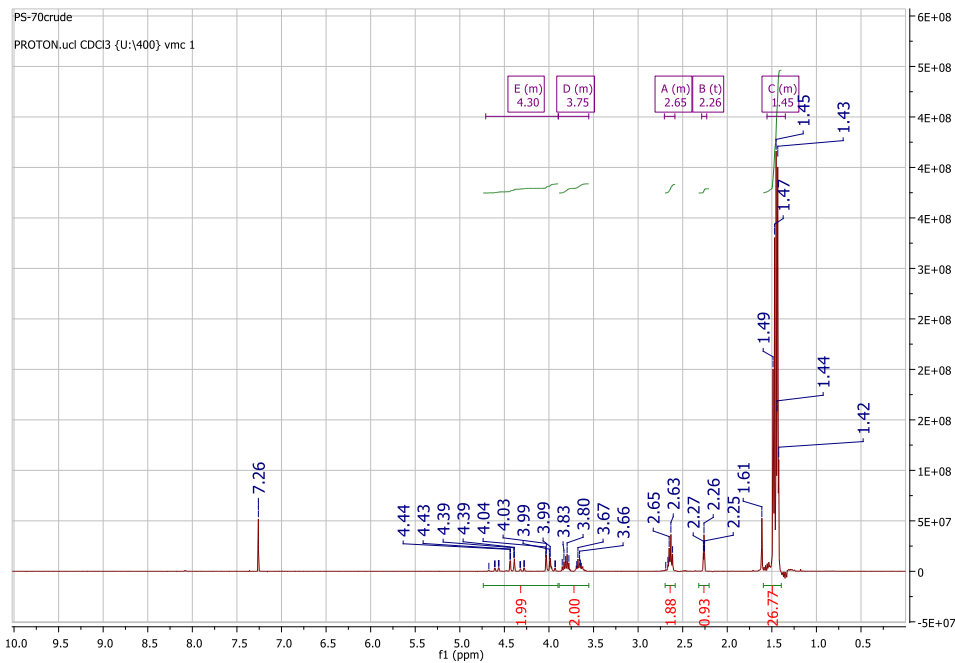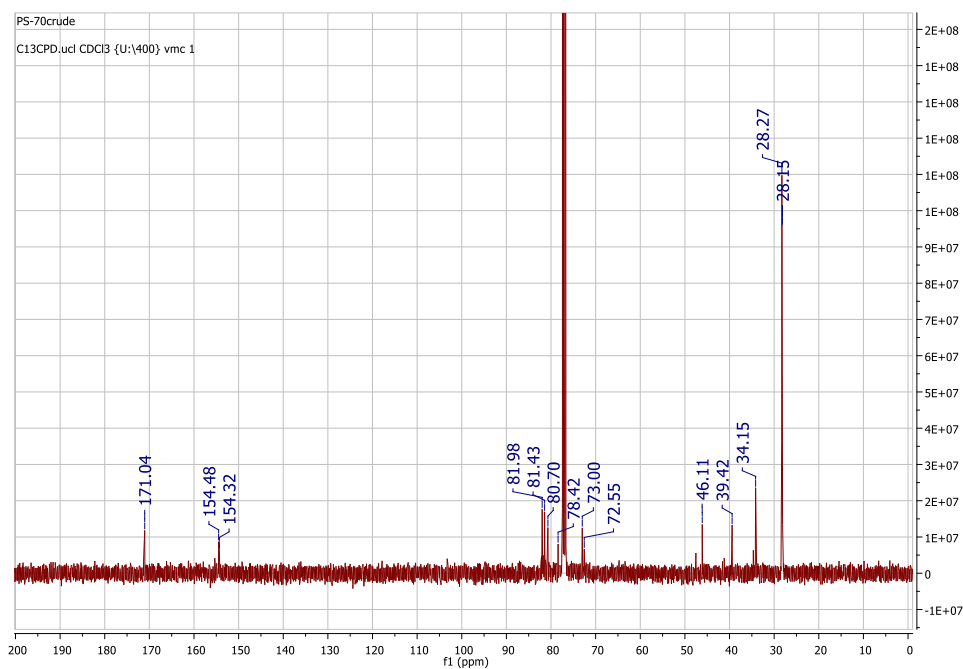

9.14. Compound **S12**, 3-(4,5-dibromo-3,6-dioxo-2-(prop-2-yn-1-yl)-3,6-dihydropyridazin-1(2H)-yl)propanoic acid<sup>3</sup>

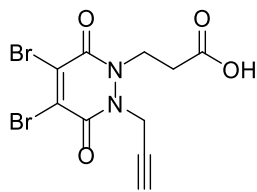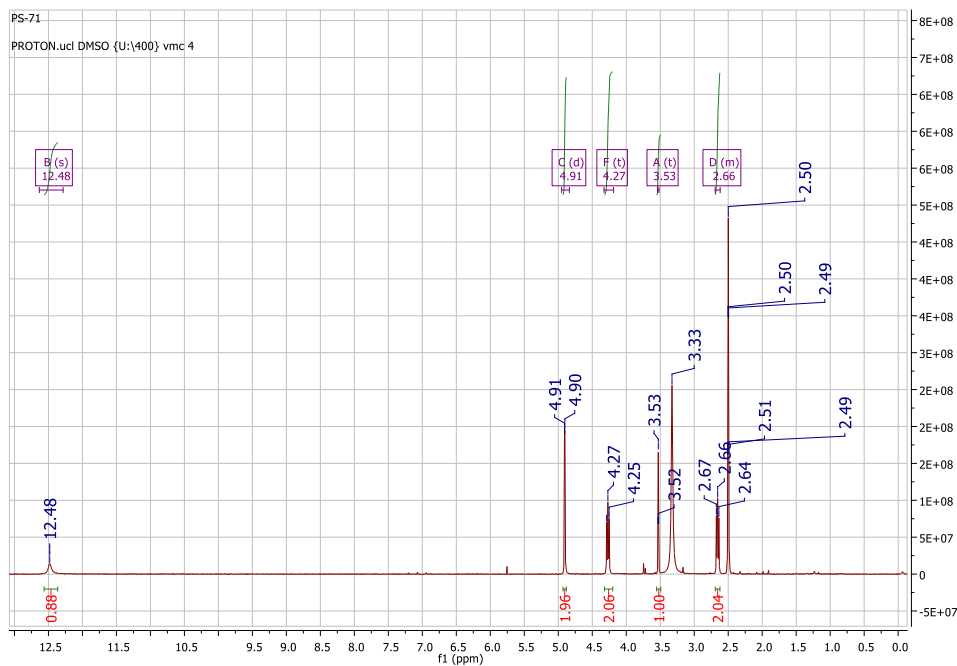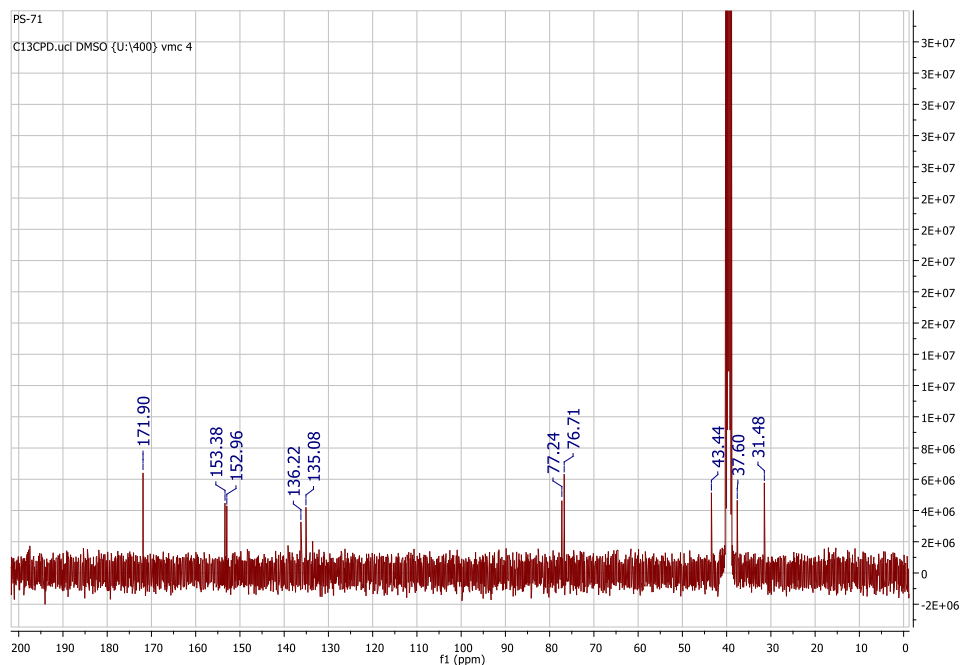

9.15. Compound **S13**, 3-(4,5-dibromo-2-((1-(1-(4-(6-methyl-1,2,4,5-tetrazin-3-yl)phenyl)-3,7-dioxo-11,14,17-trioxa-2,8-diazanonadecan-19-yl)-1*H*-1,2,3-triazol-4-yl)methyl)-3,6-dioxo-3,6-dihydropyridazin-1(2*H*)-yl)propanoic acid<sup>3</sup>

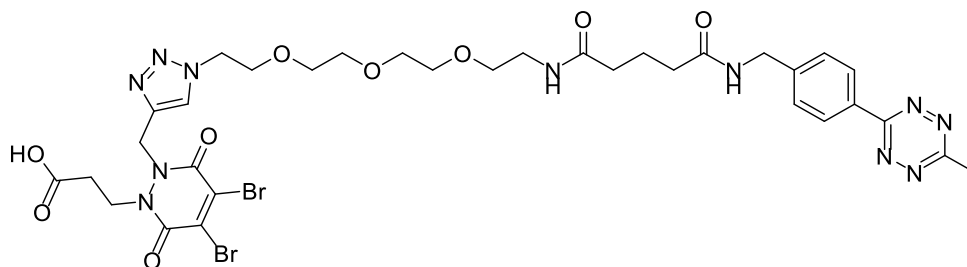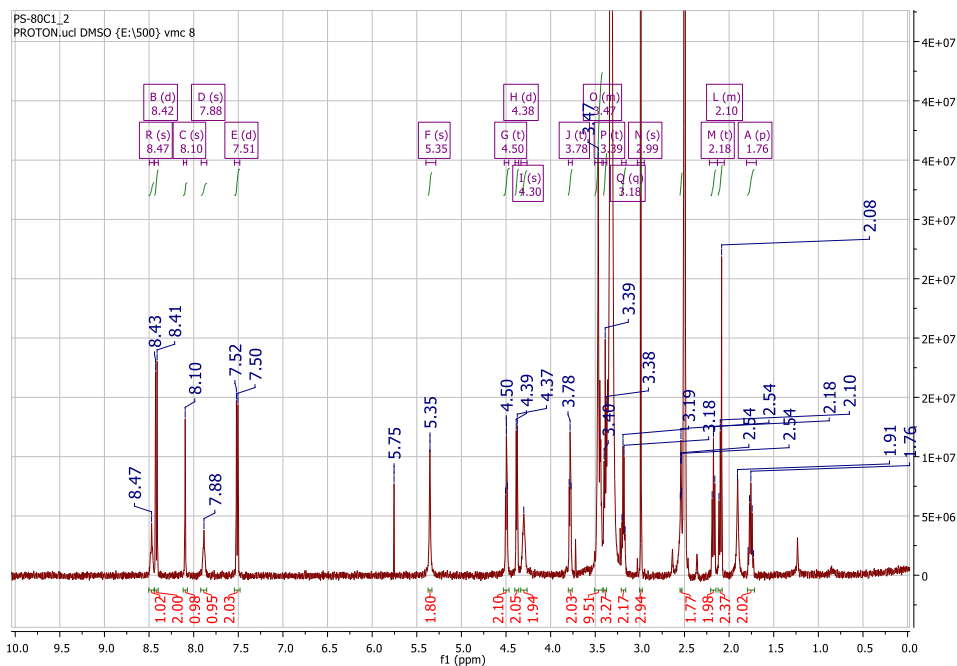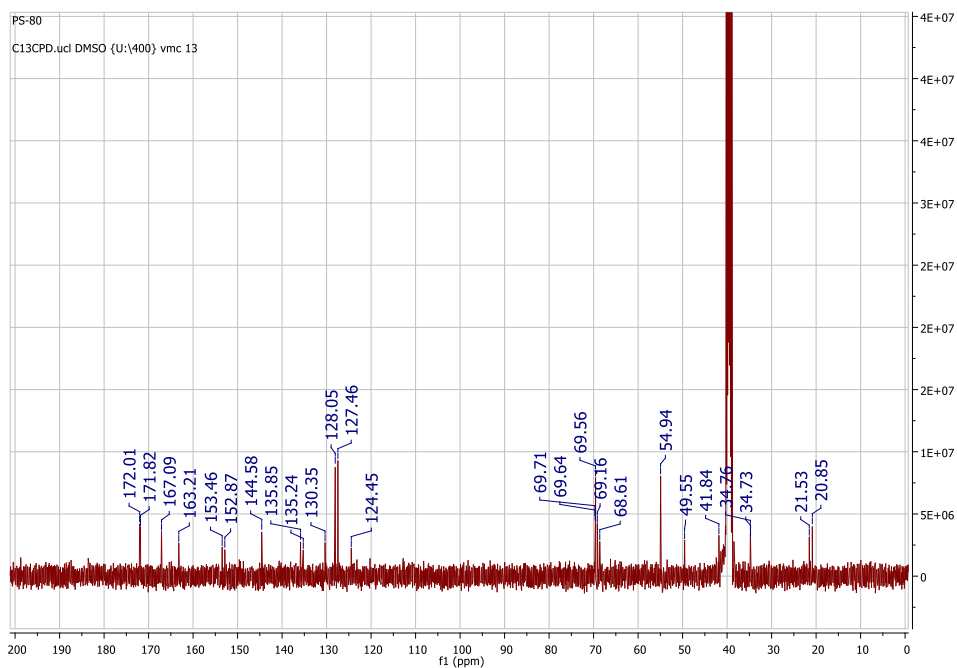

9.16. Compound **1**, N1-(2-(2-(2-(2-(4-((2-(1-azido-13-oxo-3,6,9-trioxa-12-azapentadecan-15-yl)-4,5-dibromo-3,6-dioxo-3,6-dihydropyridazin-1(2H)-yl)methyl)-1H-1,2,3-triazol-1-yl)ethoxy)ethoxy)ethoxy)ethyl)-N5-(4-(6-methyl-1,2,4,5-tetrazin-3-yl)benzyl)glutaramide<sup>3</sup>

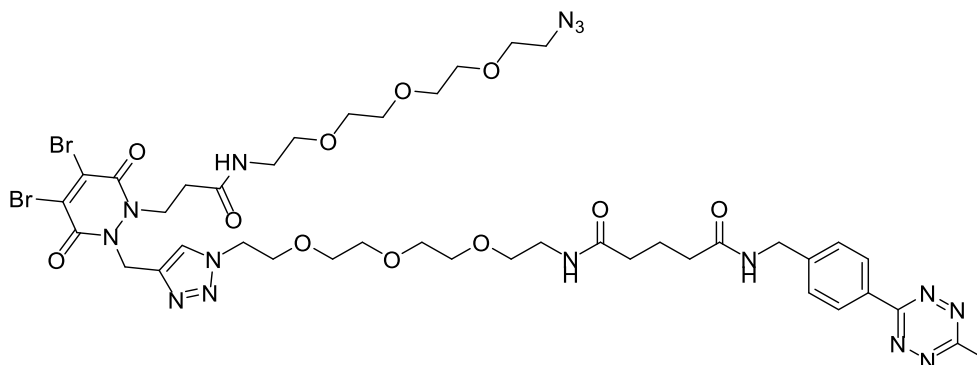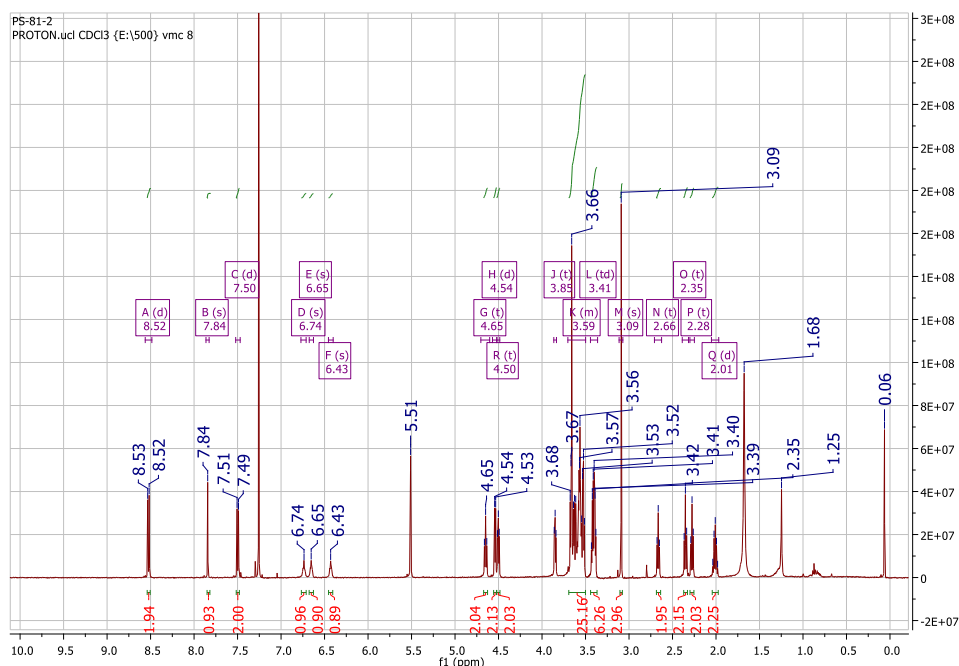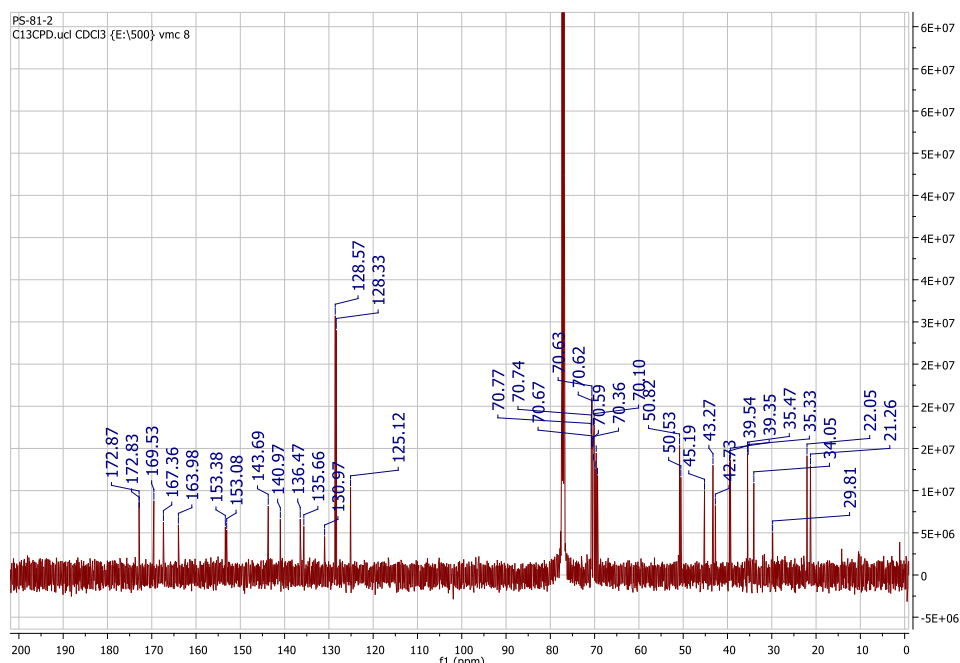





## 10. LC-MS spectra

N.B.: The region of the LC TIC trace from which the raw data was extracted is shown in the upper left corner of the raw data and deconvoluted spectra.

### 10.2. Fab<sub>PD-1</sub> 7

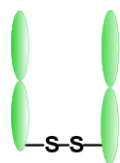

Observed mass: 47884.3 Da, 48023.4 Da.

Mass difference between peak 1 and 2: 139.1 Da (histidine residue (137.1 Da)?).

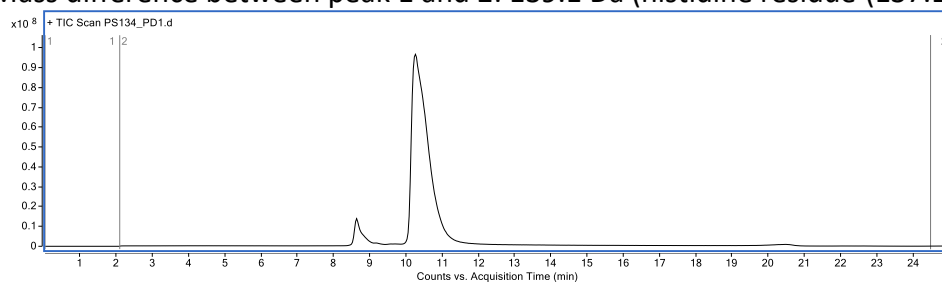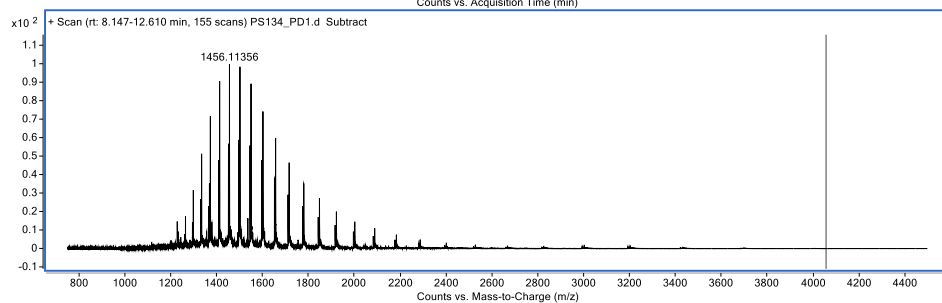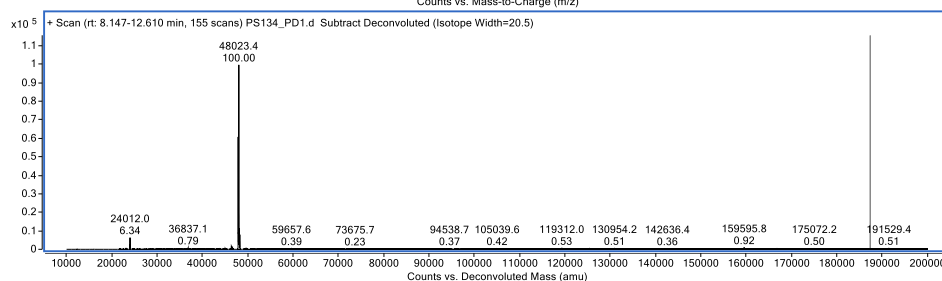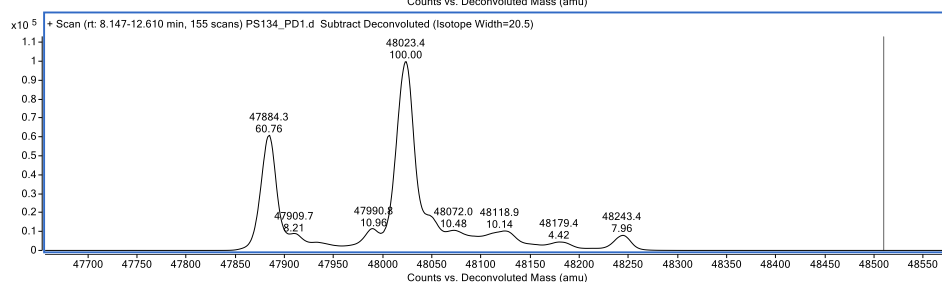

### 10.3. Sia-Tet-N<sub>3</sub> 8

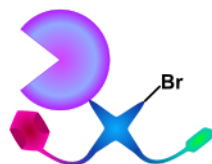

Expected mass: 47011.9 Da.

Observed mass: 47012.4 Da.

1118.26 Da -> Br<sub>2</sub>PD-Tet-N<sub>3</sub> 1 + Na<sup>+</sup>

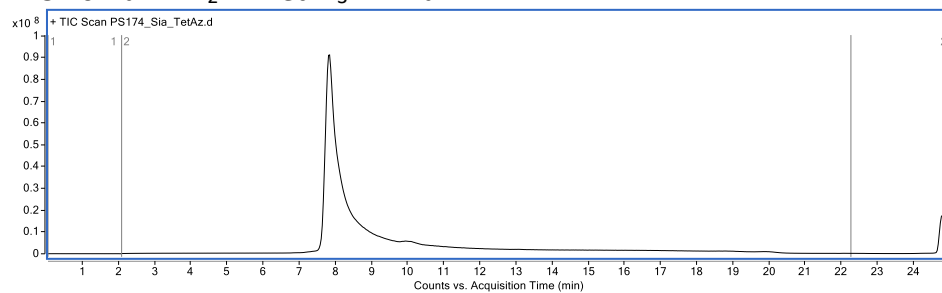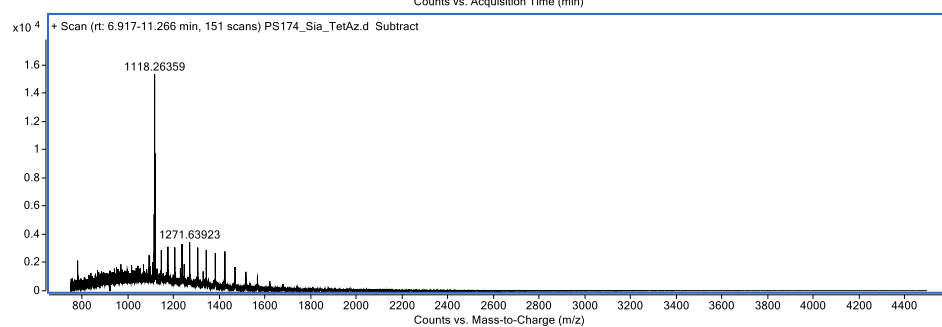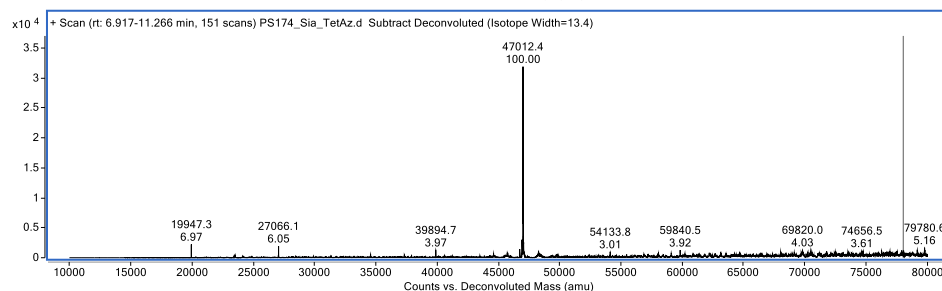

## 10.4. Fab<sub>PD-1</sub>-Tet-N<sub>3</sub> 9

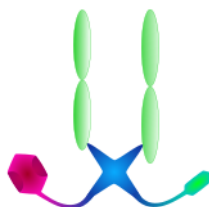

Expected mass: 48819.8 Da, 48958.9 Da.

Observed mass: 48818.0 Da, 48957.3 Da.

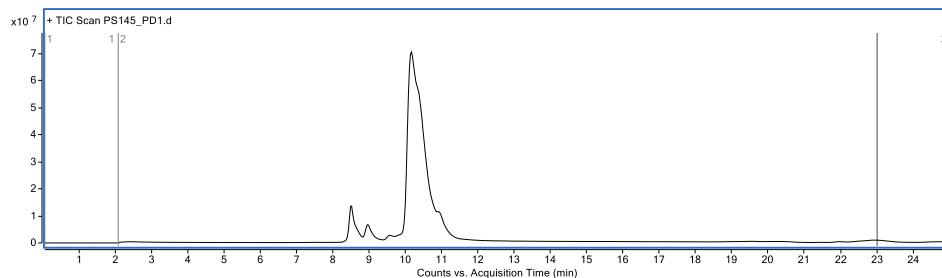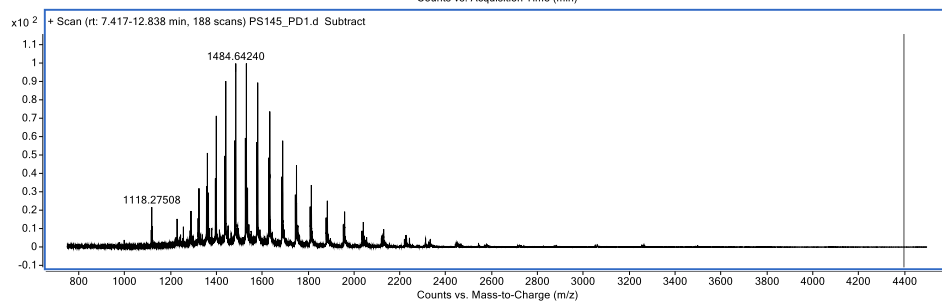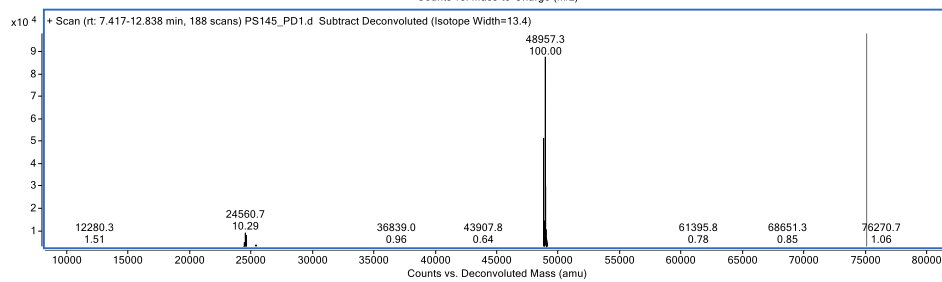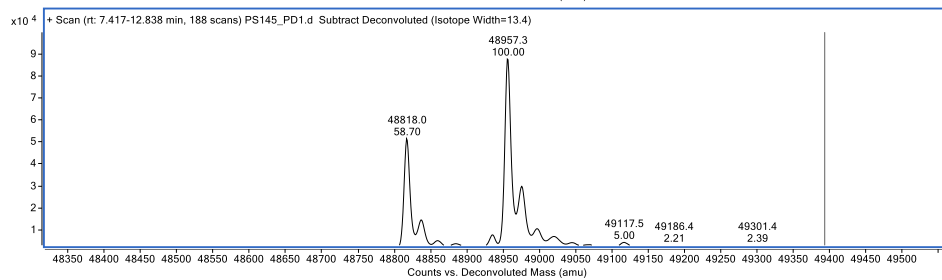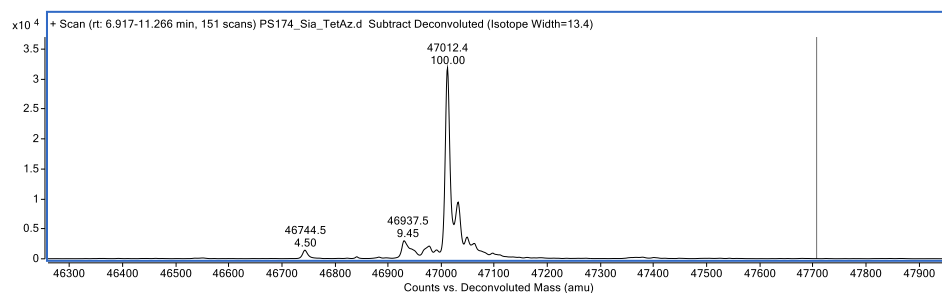

## 10.5. Fab<sub>HER2</sub>-BCN 10

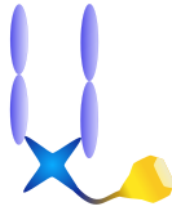

Expected mass: 48141.2 Da. Observed mass: 48140.8 Da.

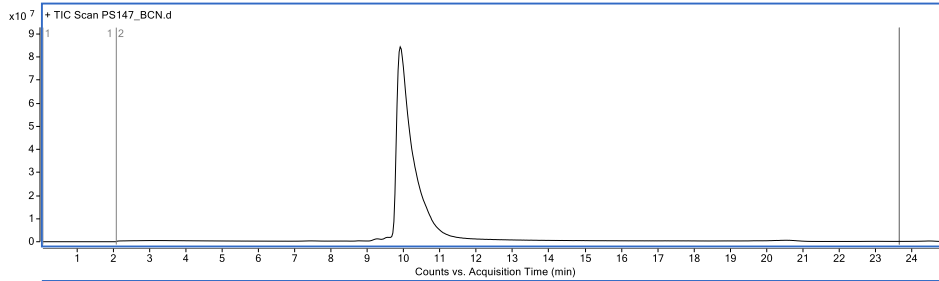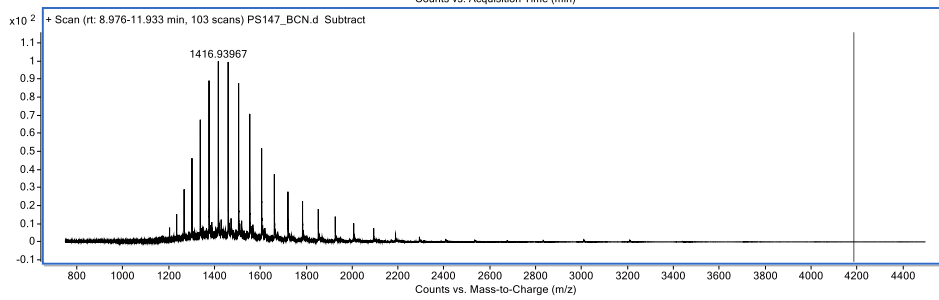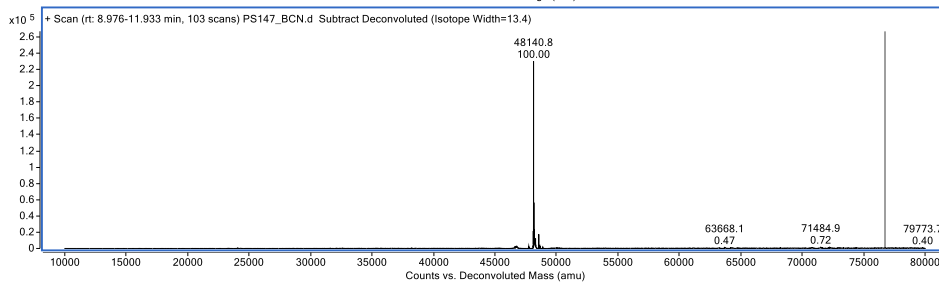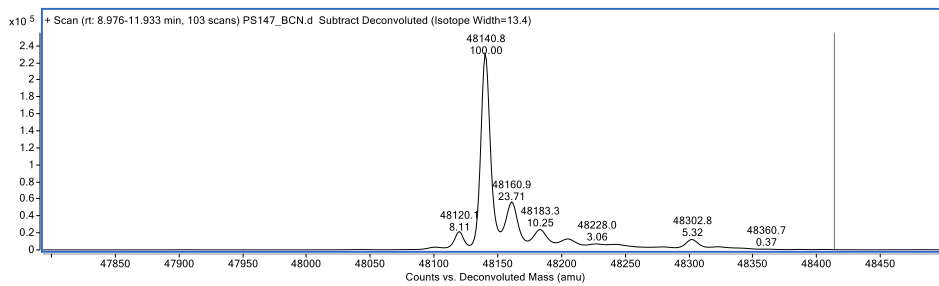

## 10.6. Fab<sub>HER2</sub>-Sia-Biotin 11

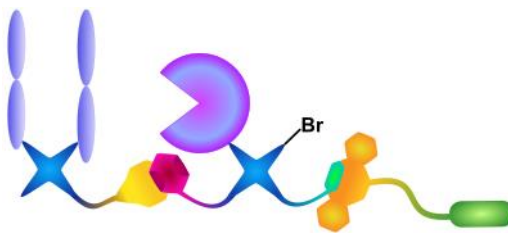

Expected mass: 95873 Da. Observed: 95845 and 95891 Da (HCO<sub>2</sub>H adduct).

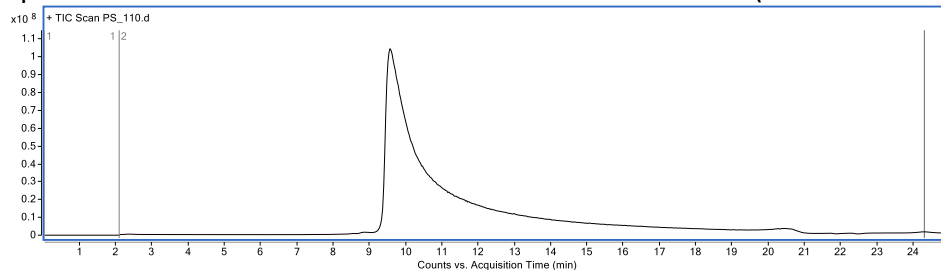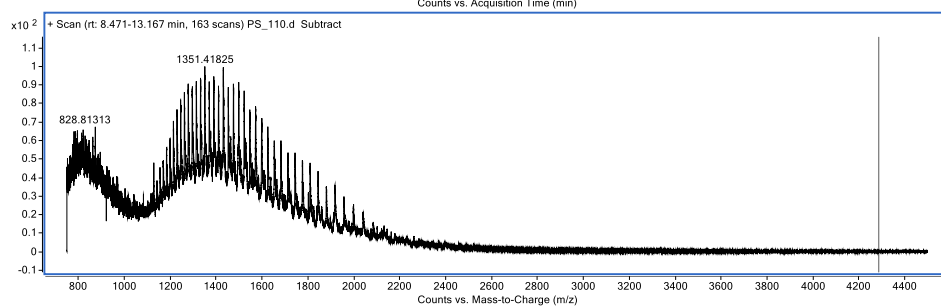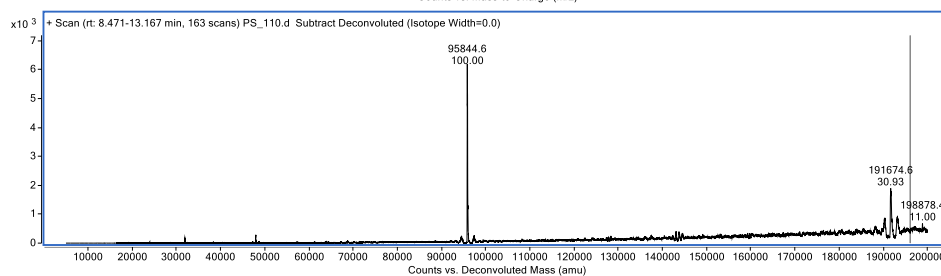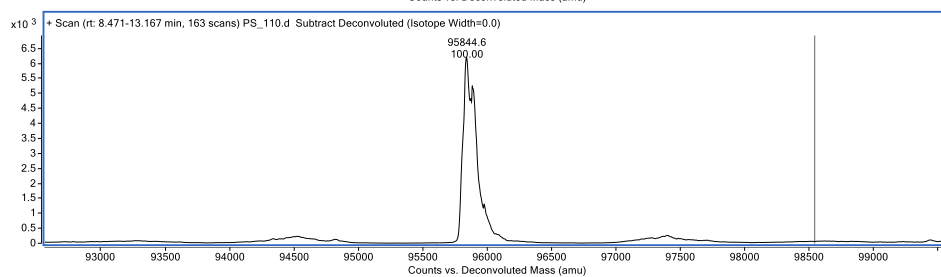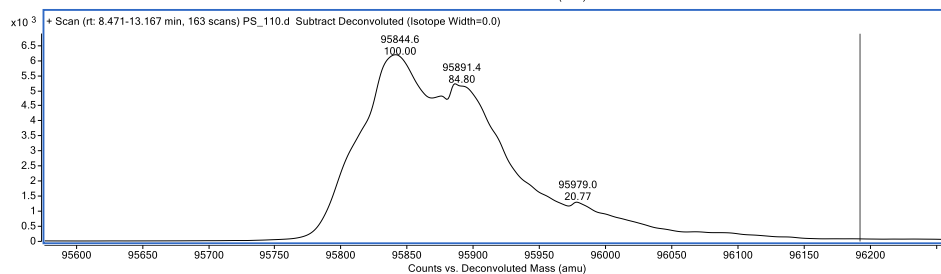

## 10.7. Fab<sub>HER2</sub>-Fab<sub>CD3</sub>-Biotin 12

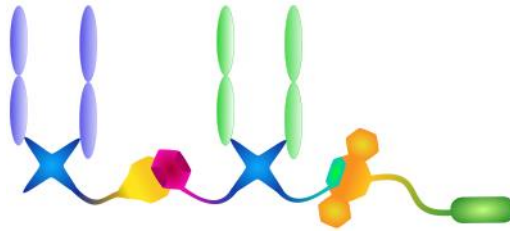

Expected mass: 97243 Da. Observed mass: 97257 Da. (Hump on right derives from Fab<sub>CD3</sub>.)

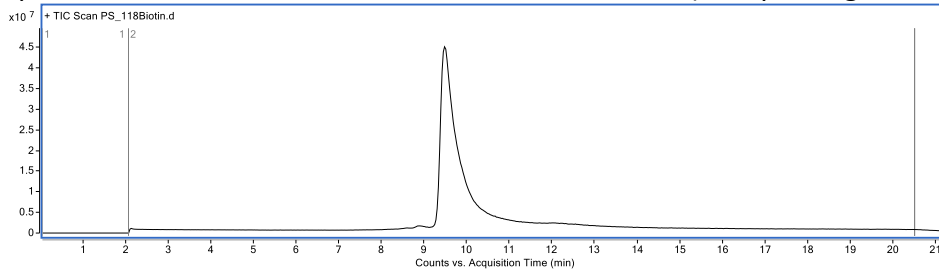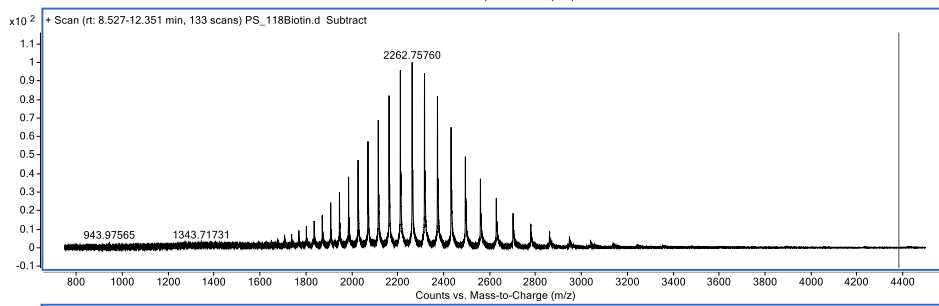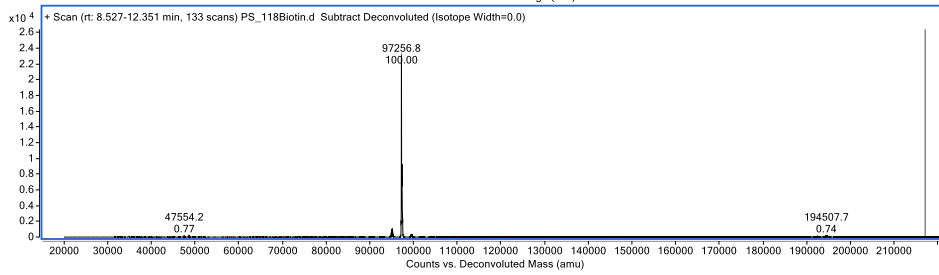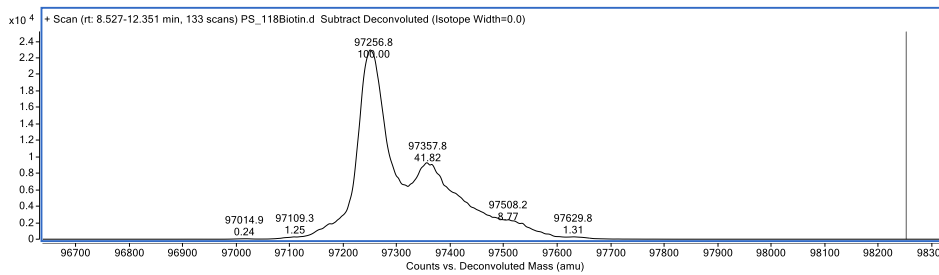

## 10.8. Fab<sub>HER2</sub>-Fab<sub>CD3</sub>-N<sub>3</sub> 13

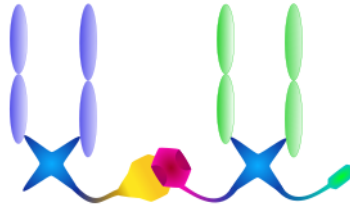

Expected mass: 96493 Da. Observed mass: 96506 Da. (Hump on right derives from Fab<sub>CD3</sub>.)

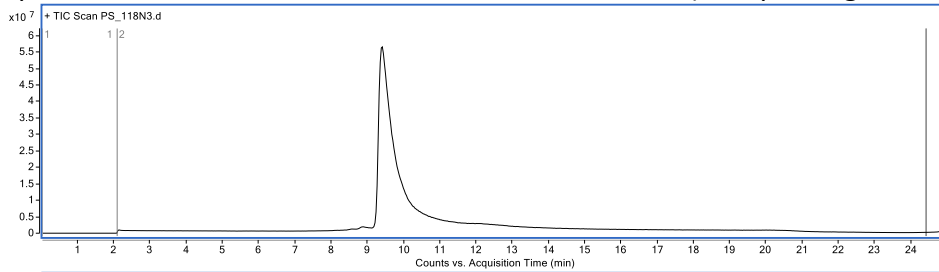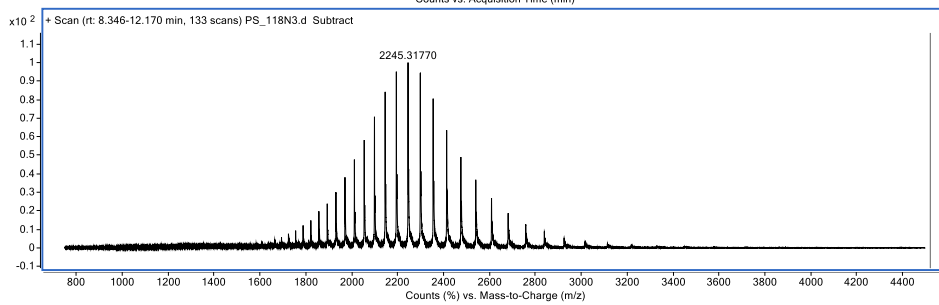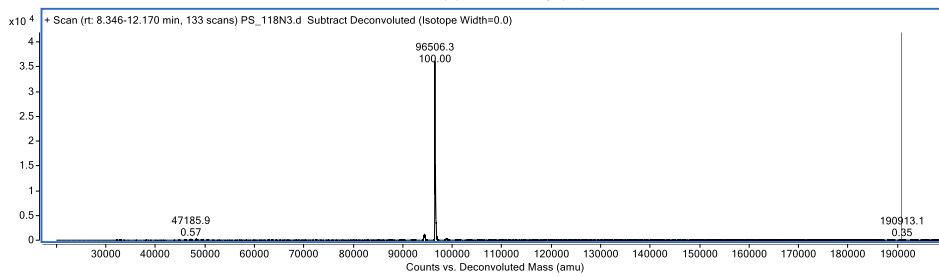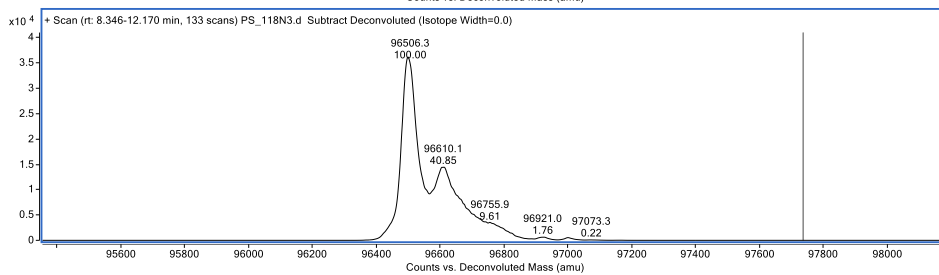

## 10.9. Fab<sub>HER2</sub>-Tet-N<sub>3</sub> 15

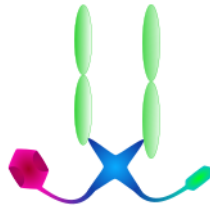

Expected mass: 48574.1 Da.

Observed mass: 48574.1 Da, 48814.0 Da (+240 Da).

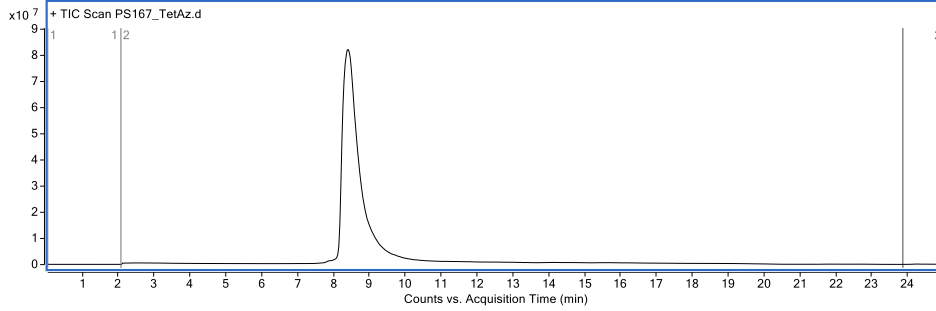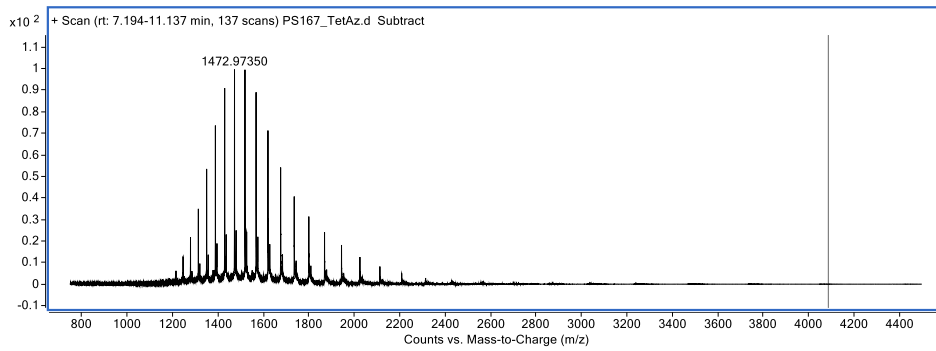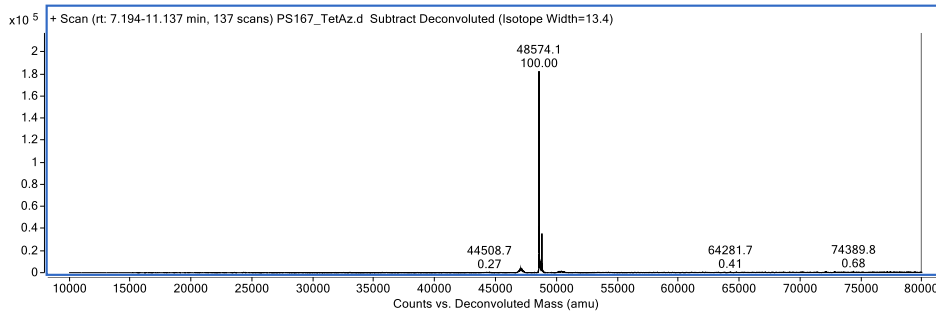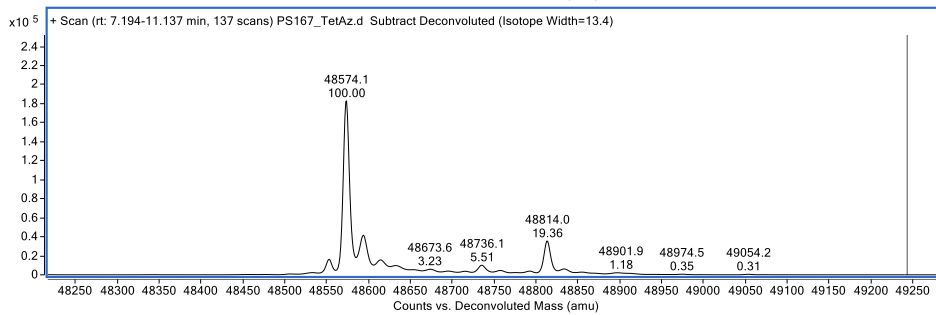



## 10.10. Fab<sub>HER2</sub>-(Biotin)-Fab<sub>CD20</sub>-Biotin 17

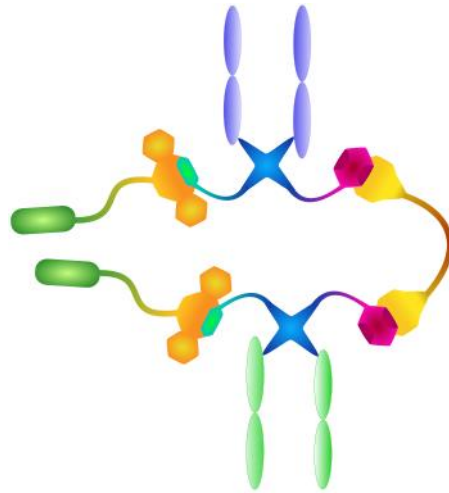

Expected mass: 98734.5 Da. Observed mass: 98722 Da.

Expected for (Fab<sub>HER2</sub>-biotin)<sub>2</sub>: 99193 Da, observed: 99181 Da.

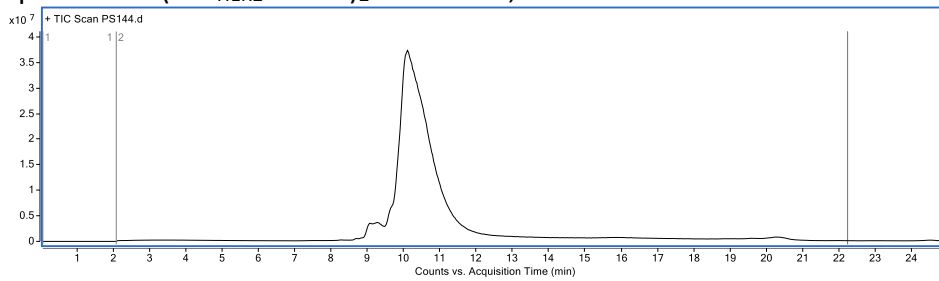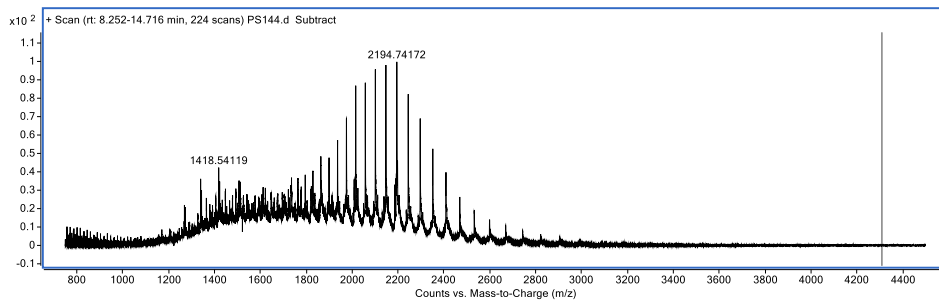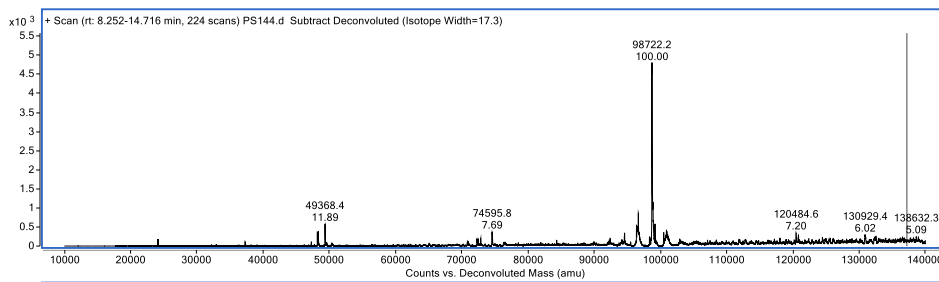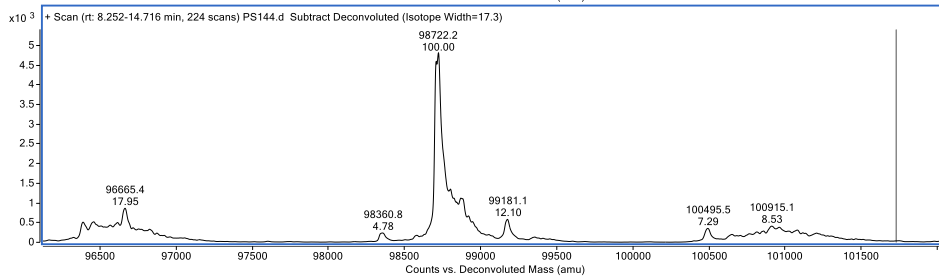

## 10.11. Fab<sub>HER2</sub>-BCN-Biotin 18

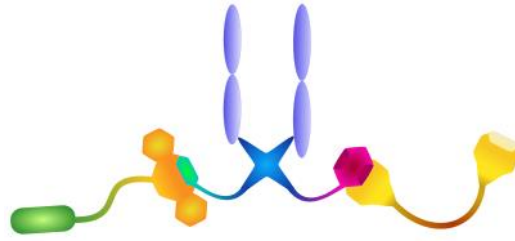

Expected mass: 49869 Da. Expected mass for oxidized version: 49901 Da (+32 Da).  
 Observed mass: 49886 Da. Difference to expected: 17 Da.

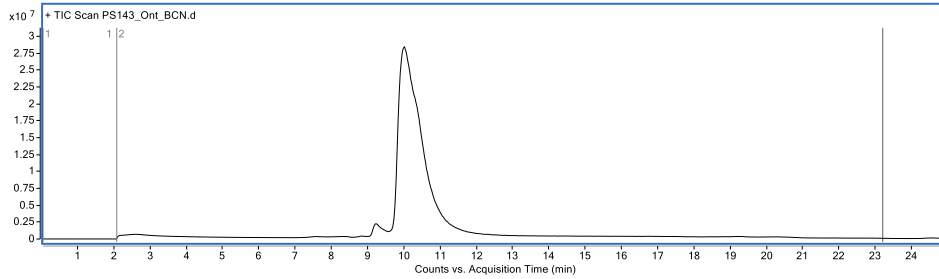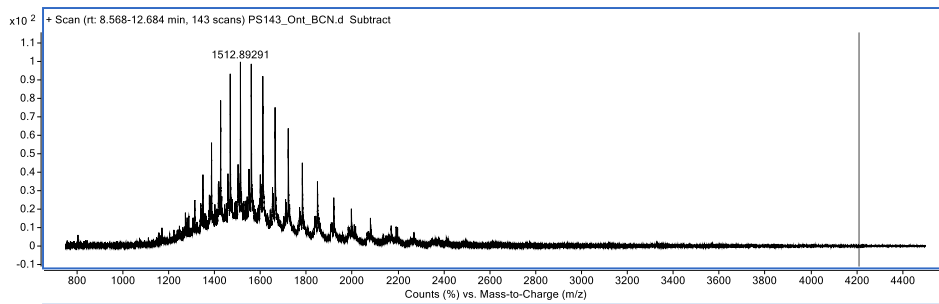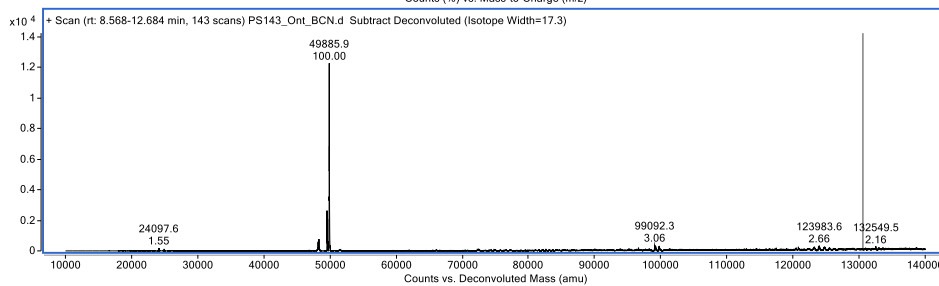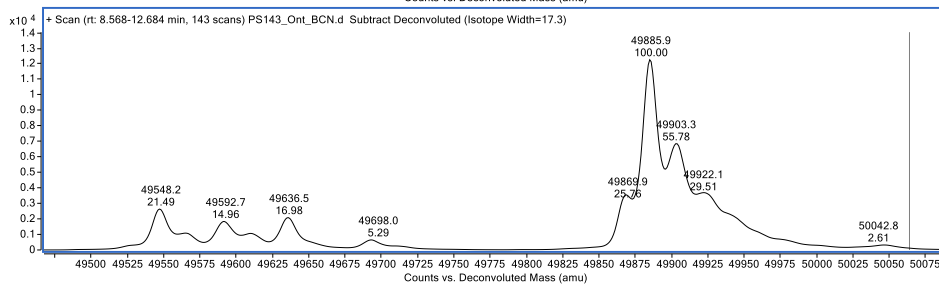

## 10.12. Fab<sub>CD20</sub>-Tet-N<sub>3</sub> 19



Expected mass: 48114 Da.

Observed mass: 48117 Da.

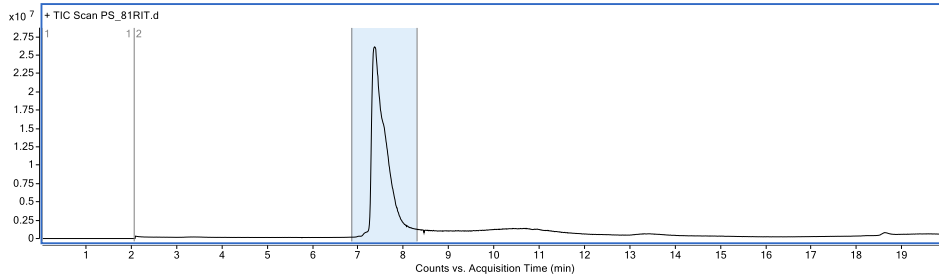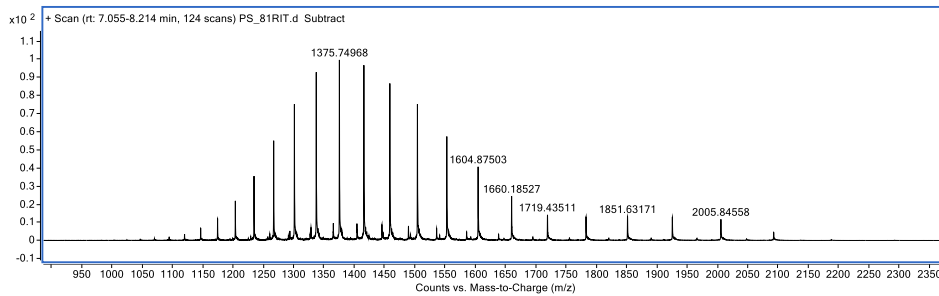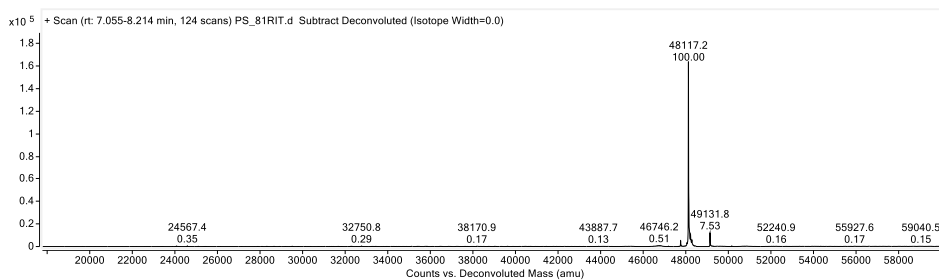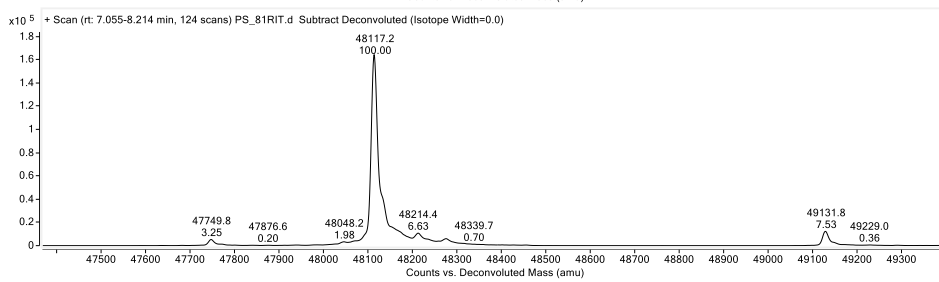

### 10.13. Fab<sub>HER2</sub>-Fab<sub>CD20</sub>-Sia-Biotin 21

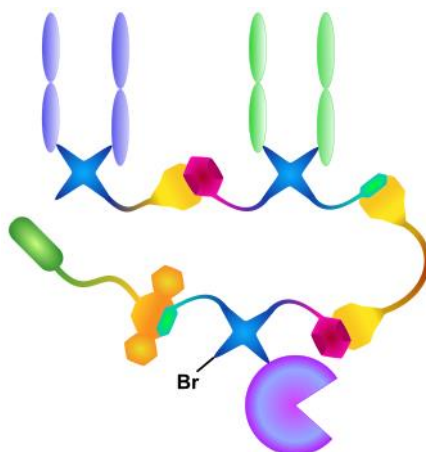

Expected mass: 144532 Da. Observed: 144553 Da.

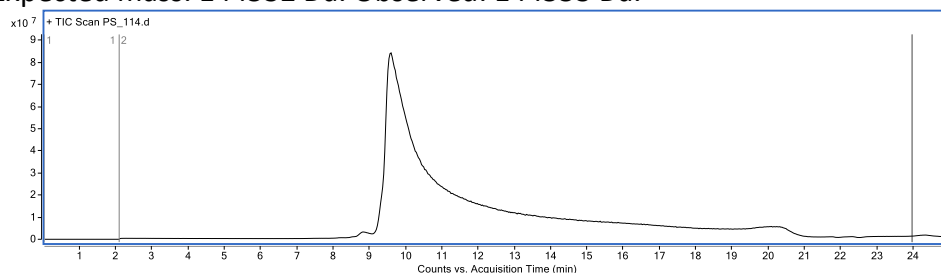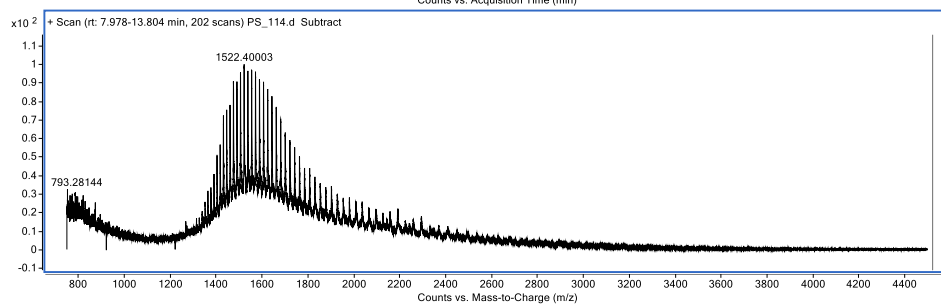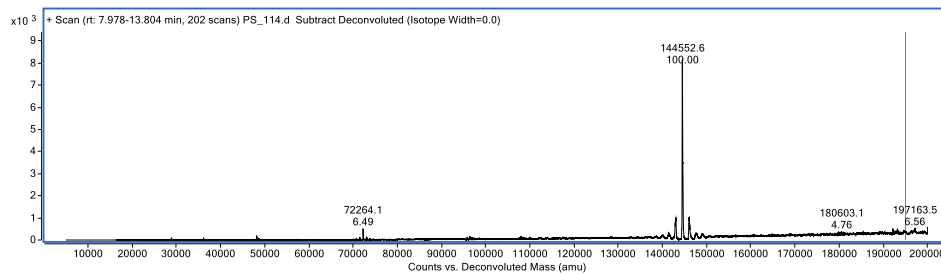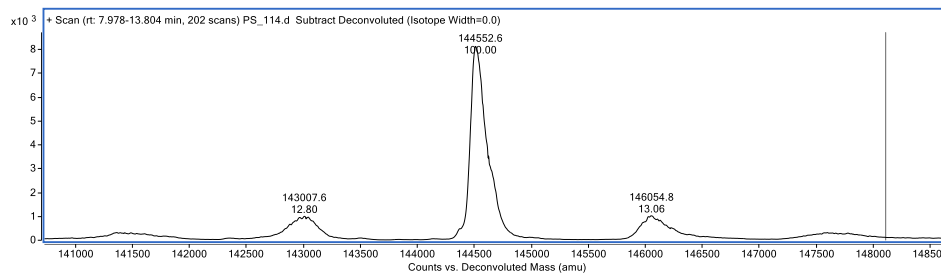

## 10.14. Fab<sub>HER2</sub>-Fab<sub>CD20</sub>-N<sub>3</sub> 22

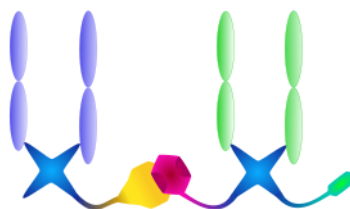

Expected mass for Fab<sub>HER2</sub>-Fab<sub>CD20</sub>-N<sub>3</sub>: 96226 Da. Observed: 96234 Da.

Expected mass for: N<sub>3</sub>-Fab<sub>CD20</sub>-tet: 48114 Da. Observed: 48117 Da.

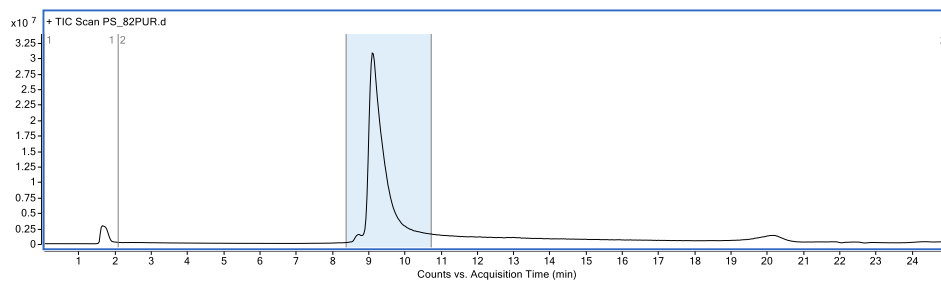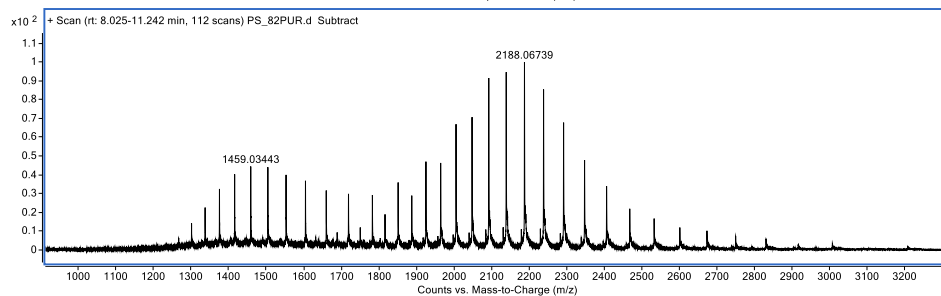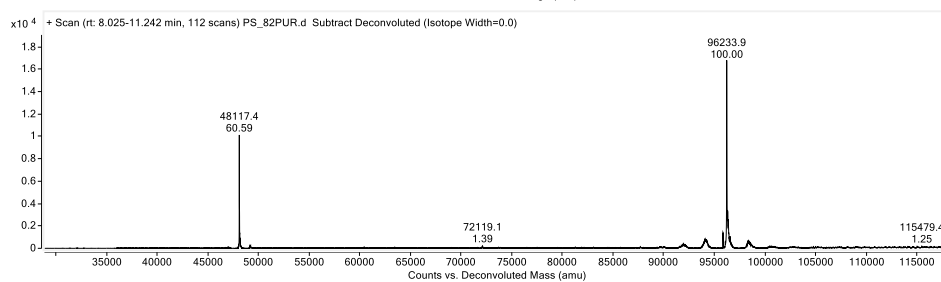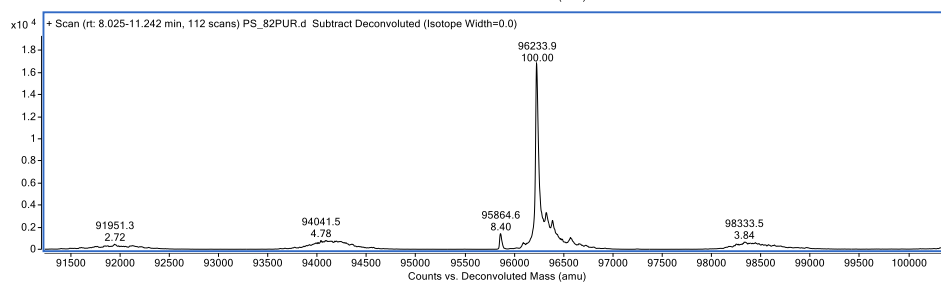

### 10.15. Fab<sub>HER2</sub>-Fab<sub>CD3</sub>-Sia-Biotin **24** - impure

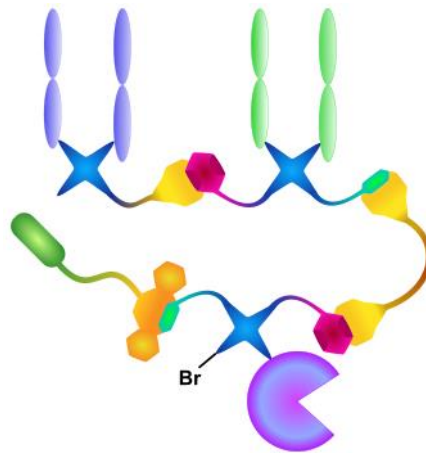

Expected mass: 144799 Da. Observed: 144791 Da.

Expected mass for Fab<sub>HER2</sub>-Fab<sub>CD3</sub>-Fab<sub>HER2</sub>: 144632 Da. Observed: 144644 Da.

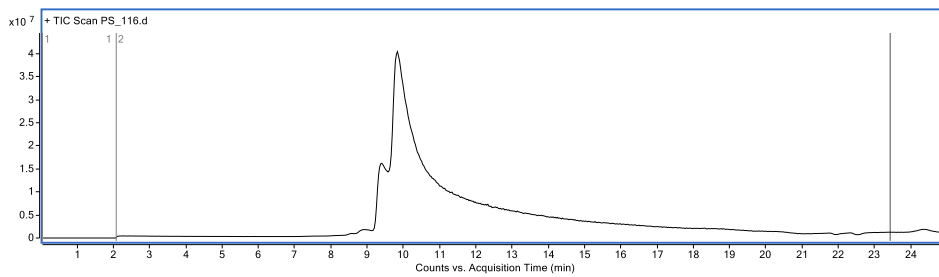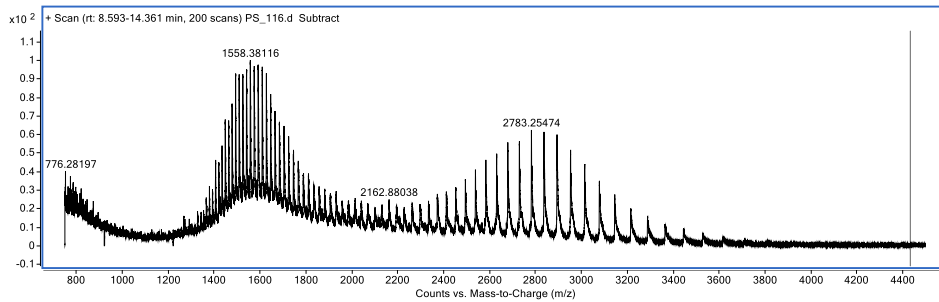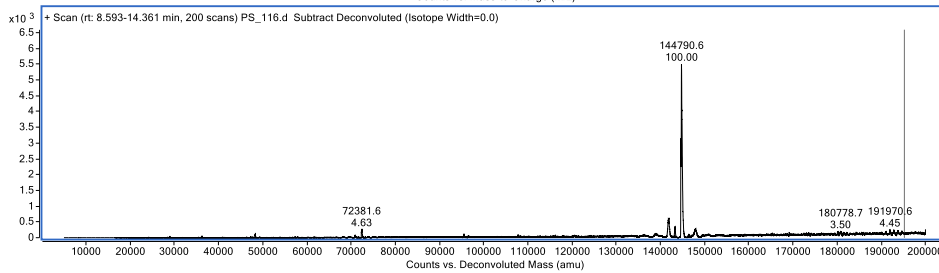

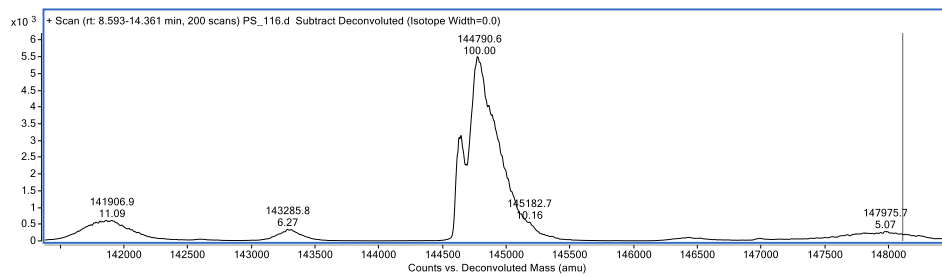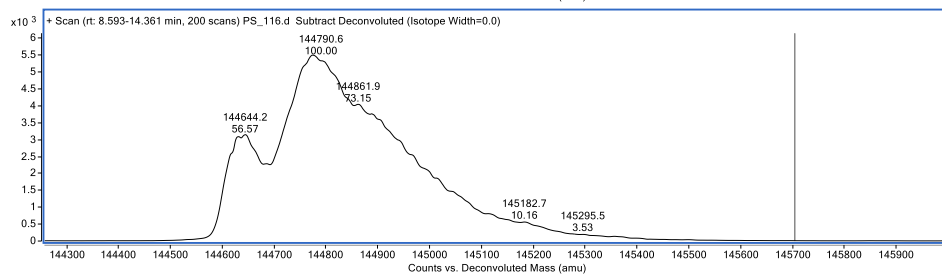

## 10.16. Fab<sub>HER2</sub>-Fab<sub>CD3</sub>-Sia-Biotin **24** - pure

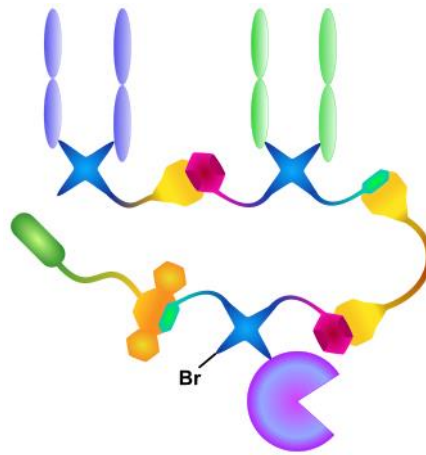

Expected mass: 144799 Da. Observed mass: 144825 Da. (Hump on right derives from Fab<sub>CD3</sub> **S18**.)

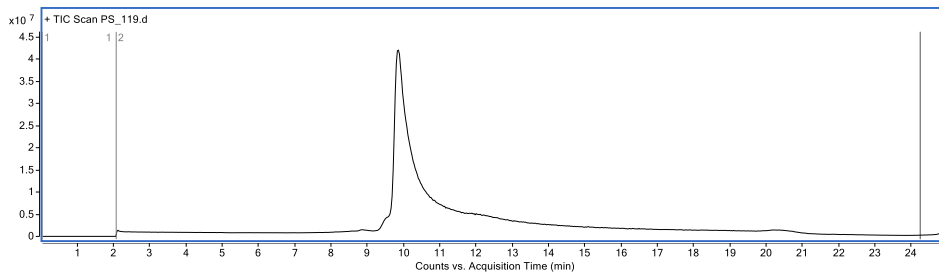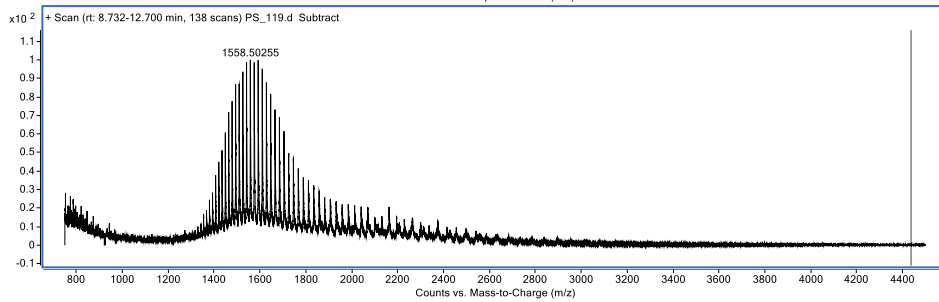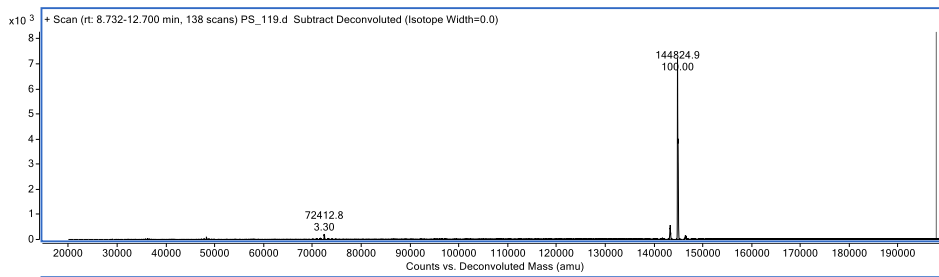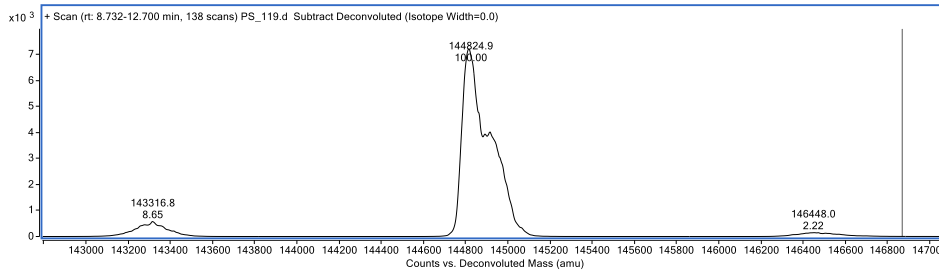



### 10.17. Fab<sub>HER2</sub>-Fab<sub>CD3</sub>-BCN 26

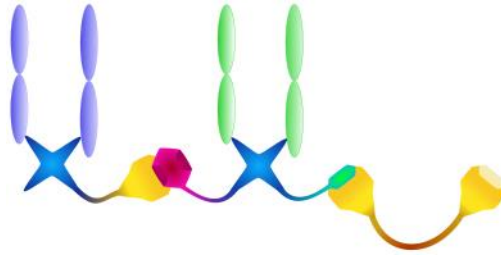

Expected mass: 97065 Da. Observed mass: 97081 Da. (Hump on right derives from Fab<sub>CD3</sub>.)

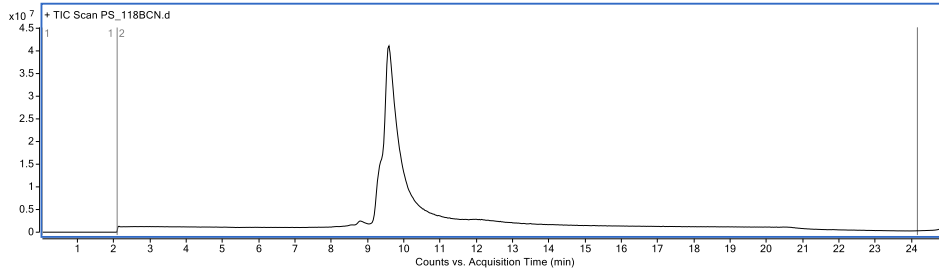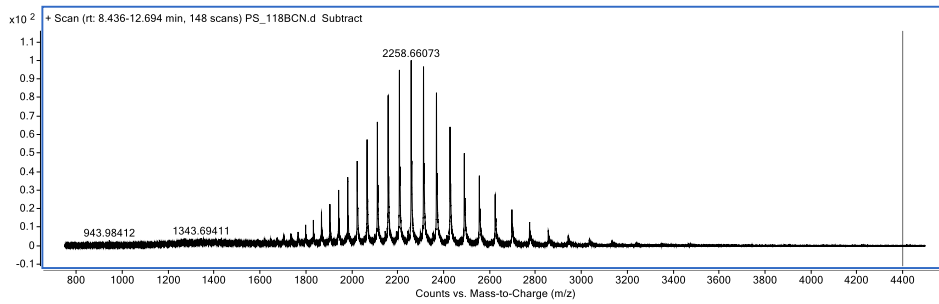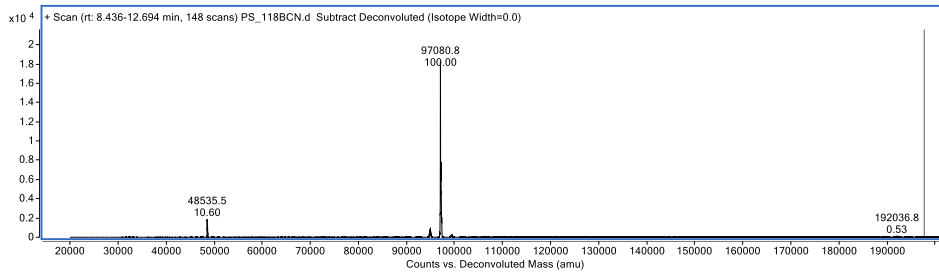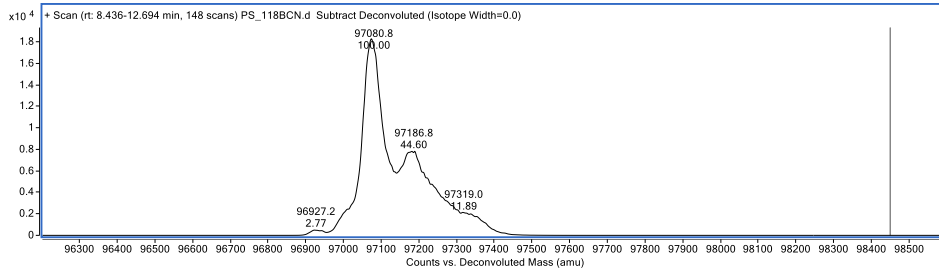

### 10.18. Fab<sub>CD3</sub>-Fab<sub>HER2</sub>-Fab<sub>PD-1</sub>-biotin 27

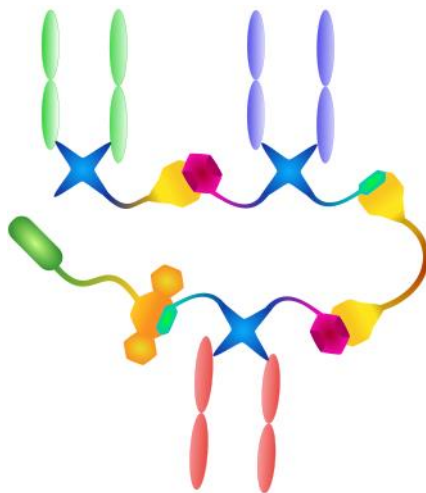

Expected mass: 146610.0 Da, 146749.1 Da, 146857.6 Da. Observed mass: 146618.0 Da, 146758.2 Da, 146861.9 Da.

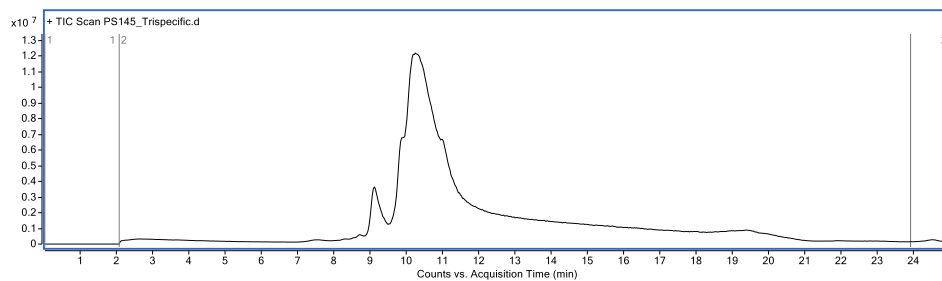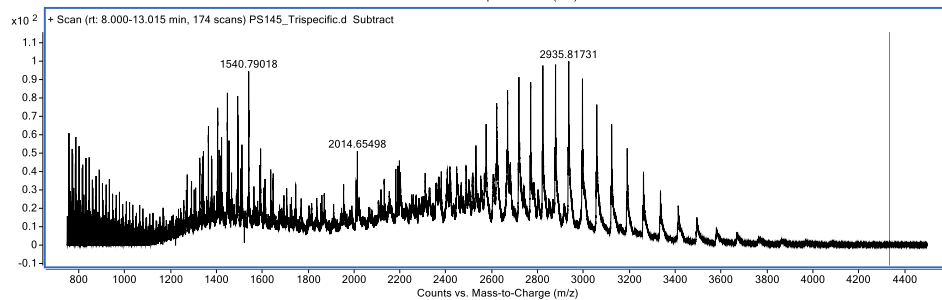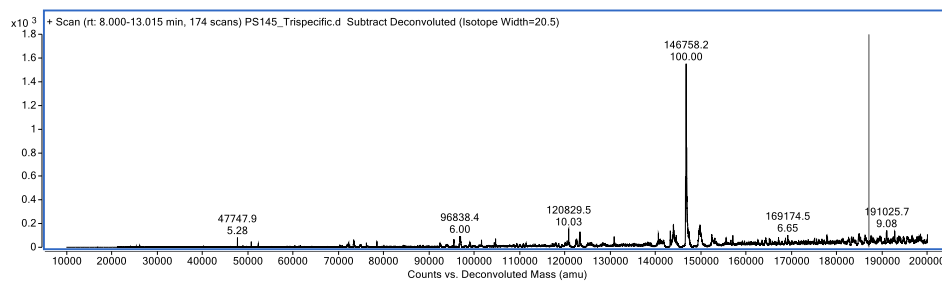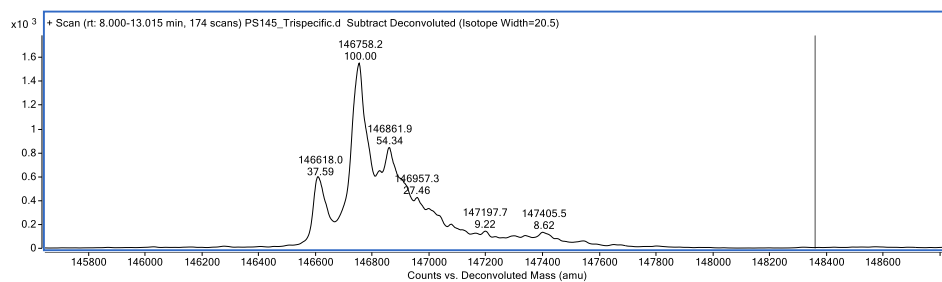

## 10.19. Fab<sub>CD3</sub>-Fab<sub>HER2</sub>-N<sub>3</sub> 28

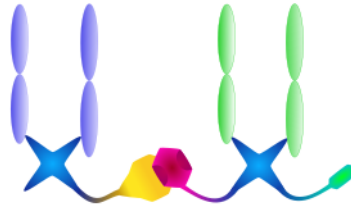

Expected mass: 96495.6 Da. Observed mass: 96505.1 Da.

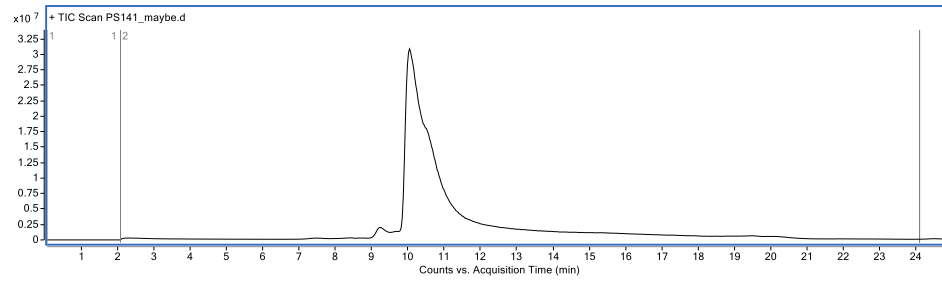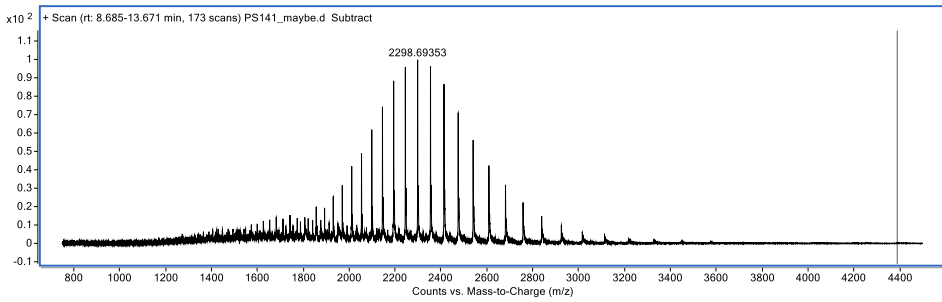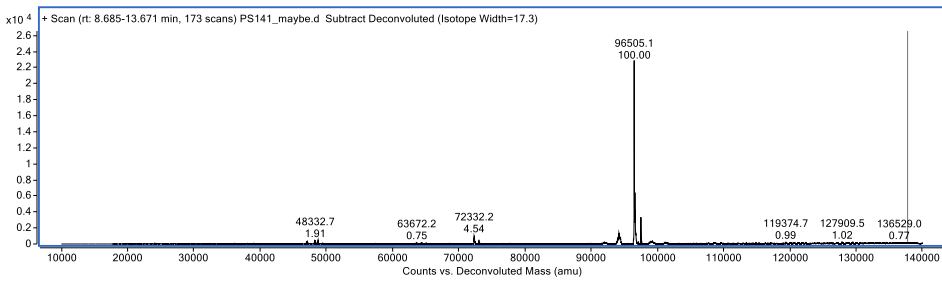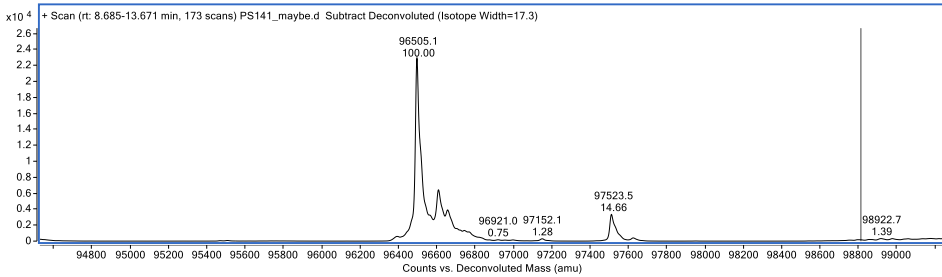

## 10.20. Fab<sub>CD3</sub>-Fab<sub>HER2</sub>-BCN 29

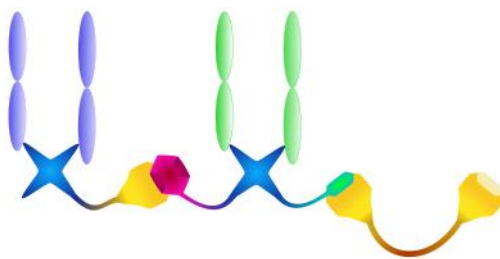

Expected mass: 97068.4 Da. Observed mass: 97086.2 and 97190.2 Da

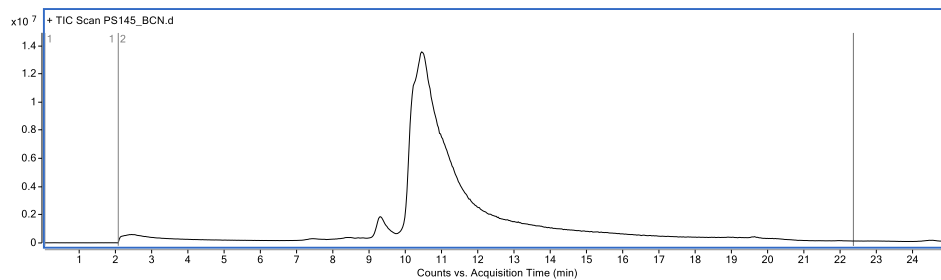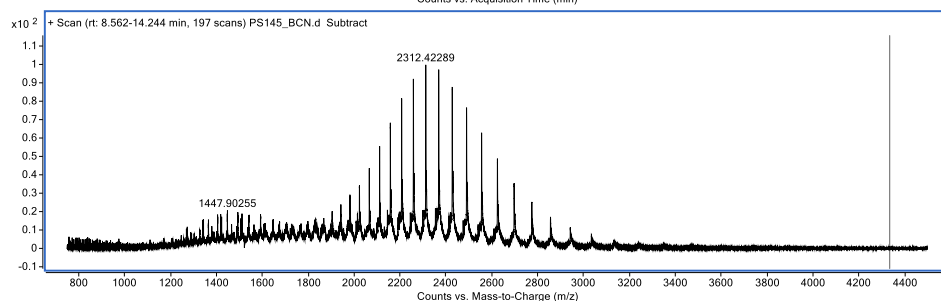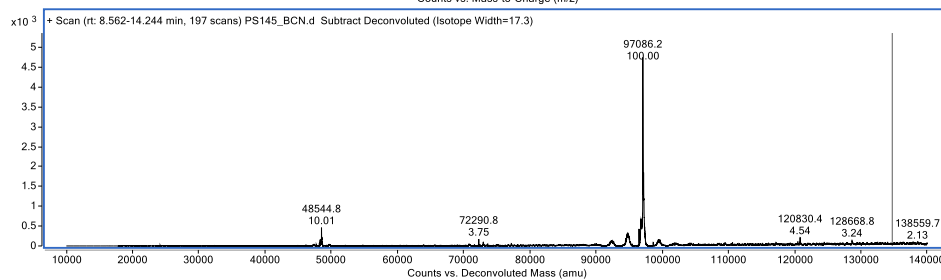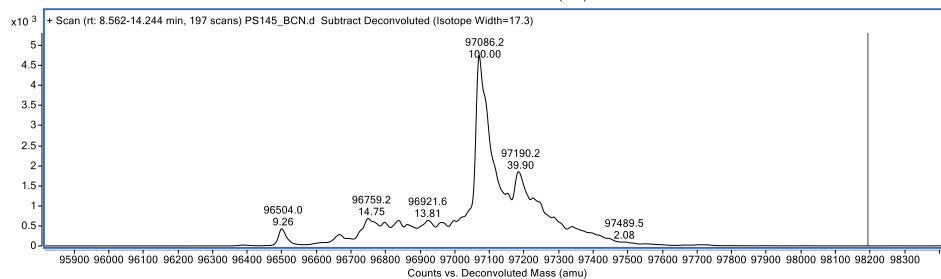

## 10.21. Fab<sub>HER2</sub>-Fab<sub>CD3</sub> 30

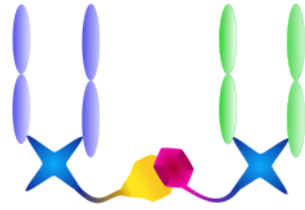

Expected mass: 96256.0 Da. Observed mass: 96261.0 Da.

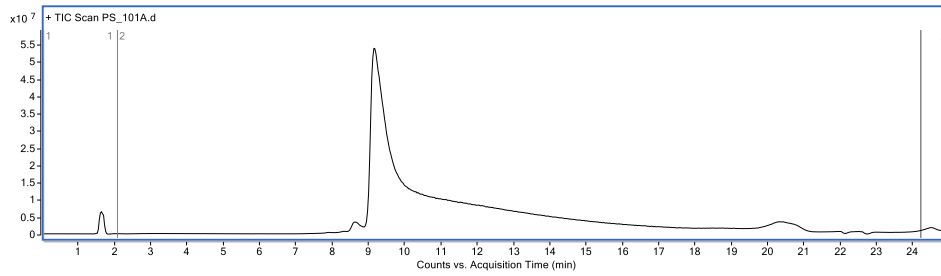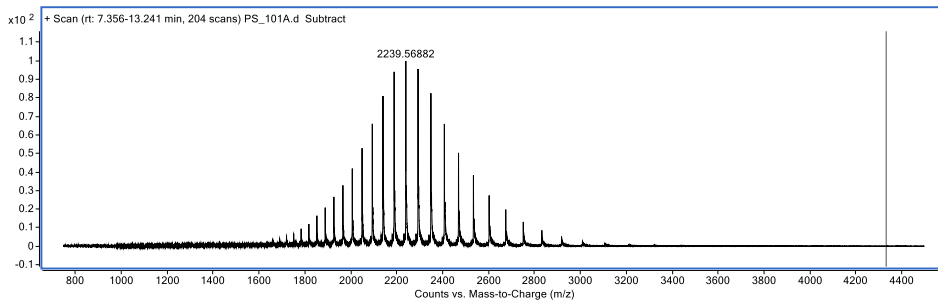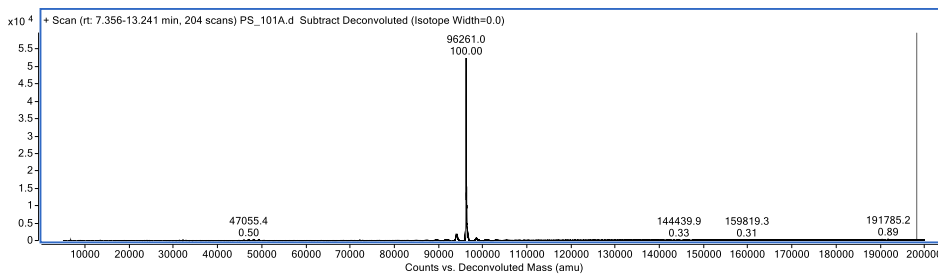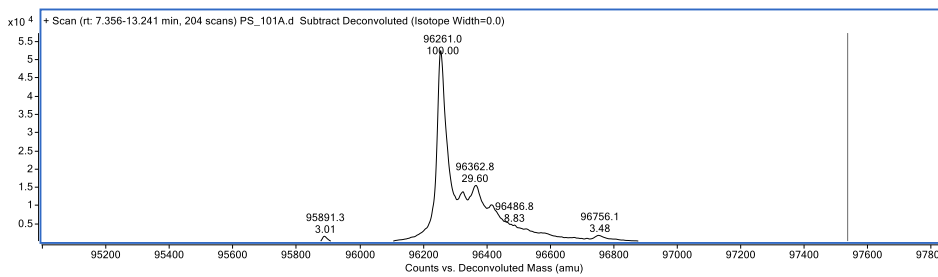

## 10.22. Fab<sub>EGFR</sub> S17

Expected mass: 49788 and 49933 Da. Observed mass: 49787 and 49932 Da.

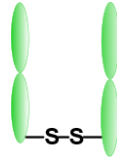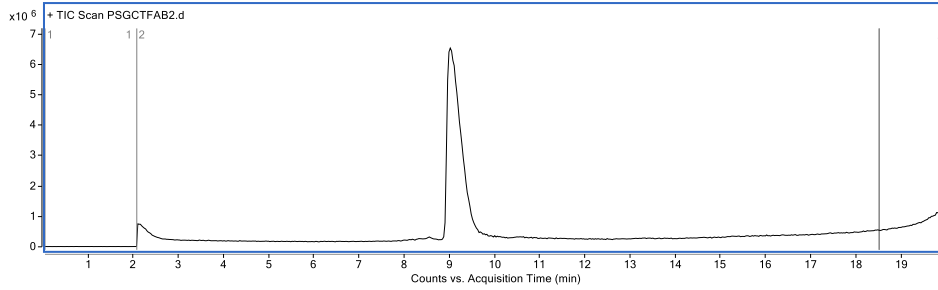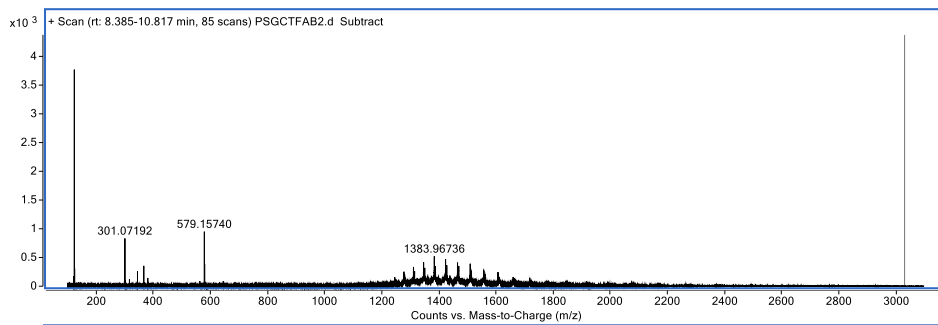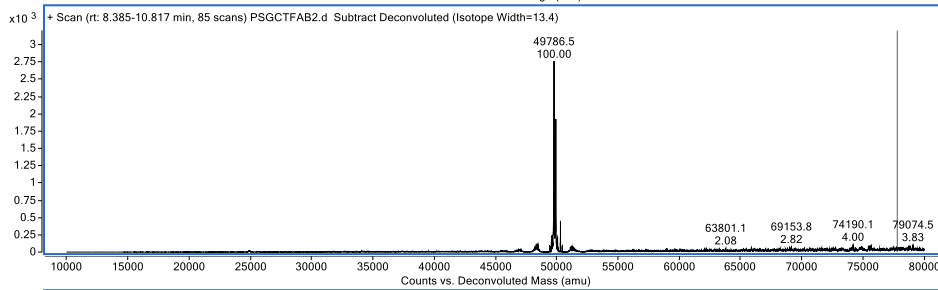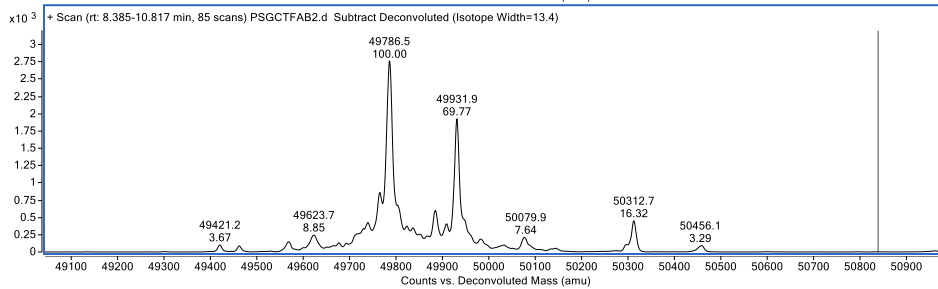

### 10.23. Fab<sub>CD3</sub> S18

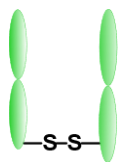

Observed mass: 47448.5 Da, 47562.5 Da.

Mass difference between peak 1 and 2: 114 Da (asparagine residue (114.1 Da)?).

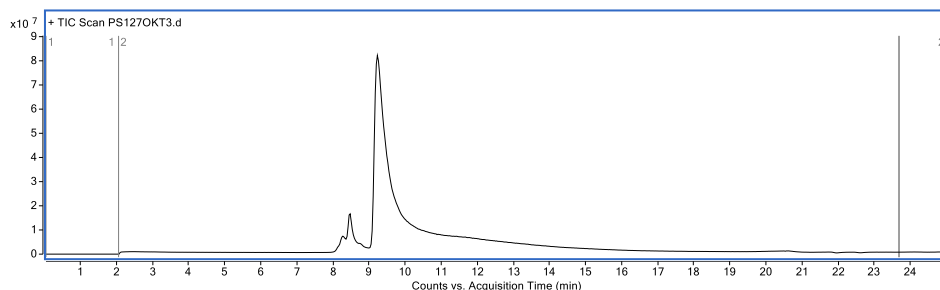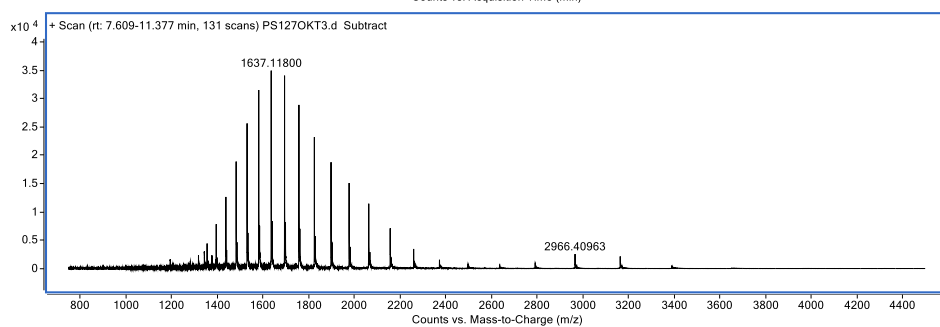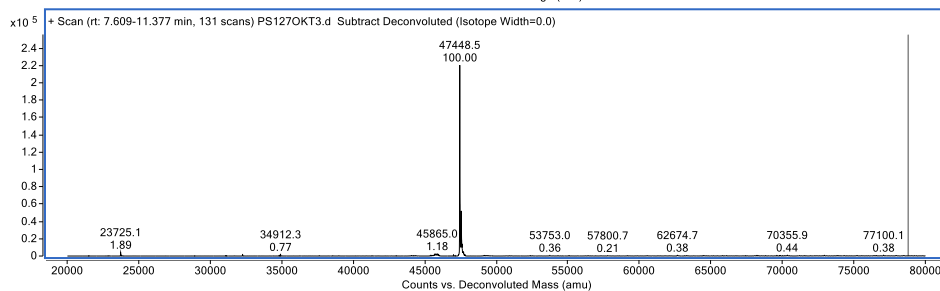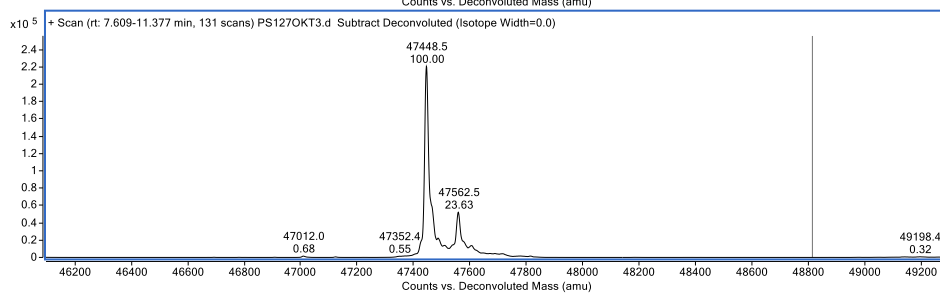

## 10.24. Fab<sub>CTLA-4</sub> S19

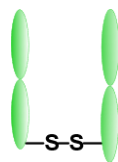

Observed mass: 47628.7 Da, 47741.6 Da.

Mass difference between peak 1 and 2: 113 Da (asparagine (114 Da)/leucine (113 Da)/isoleucine (113 Da)/aspartic acid residue (115 Da)).

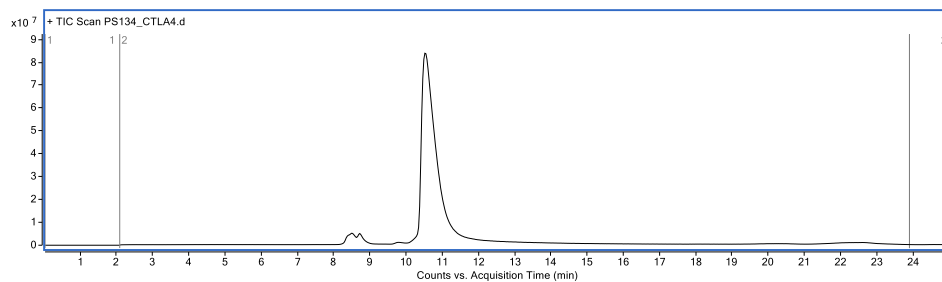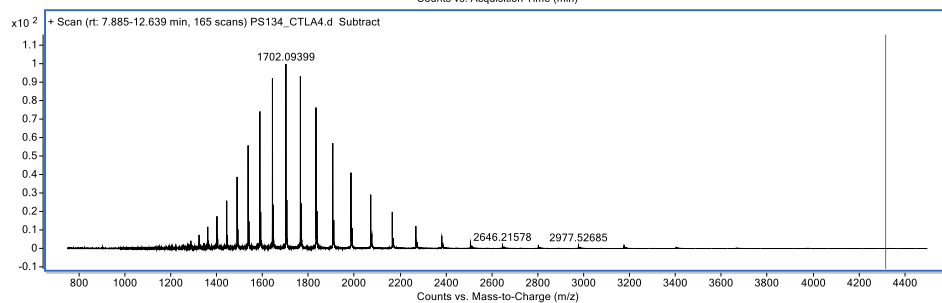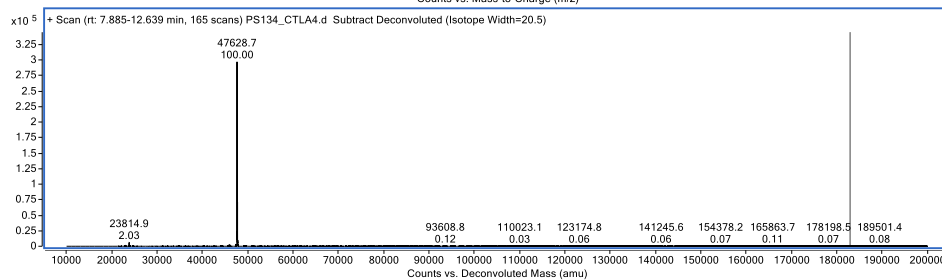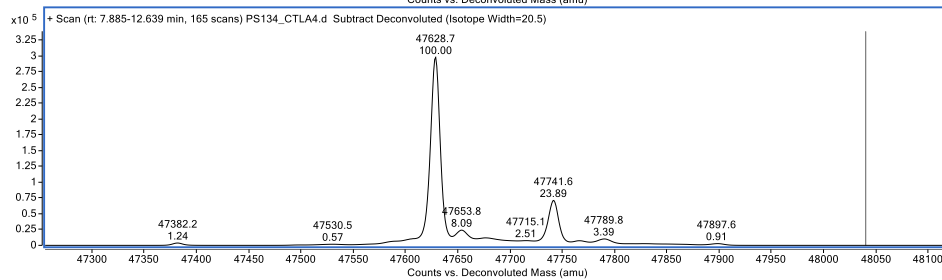



## 10.25. Fab<sub>ICOS</sub> S20



Observed mass: 47880.5 Da.  
Some HC and LC also present.

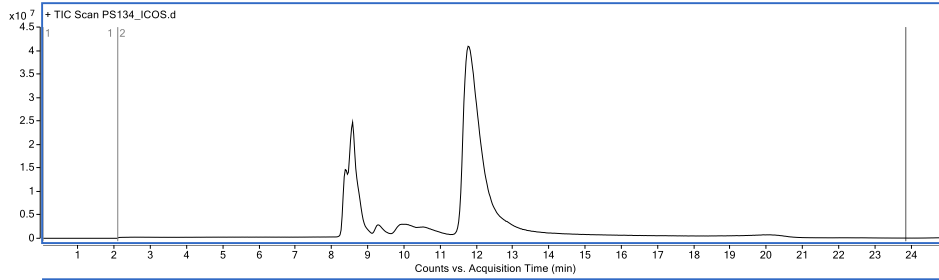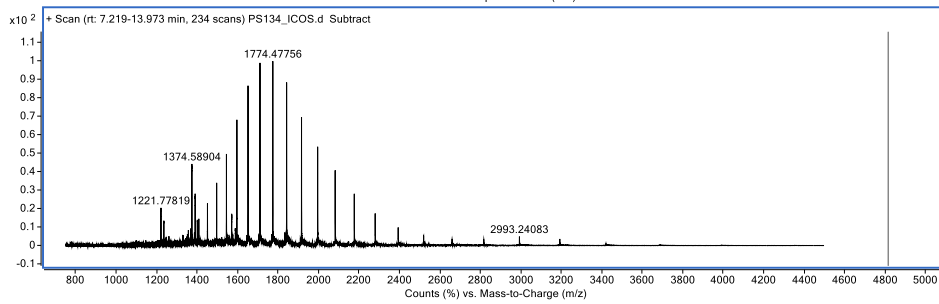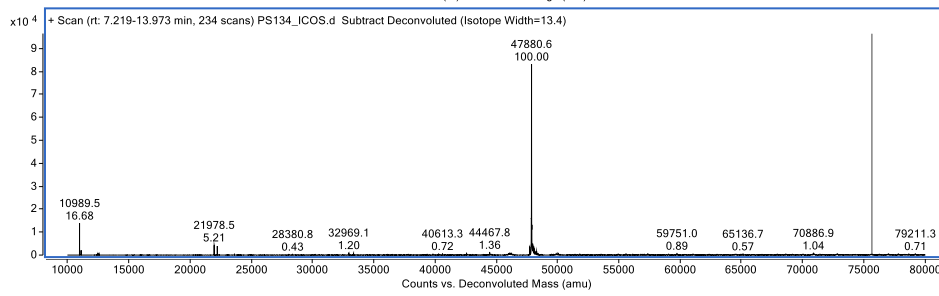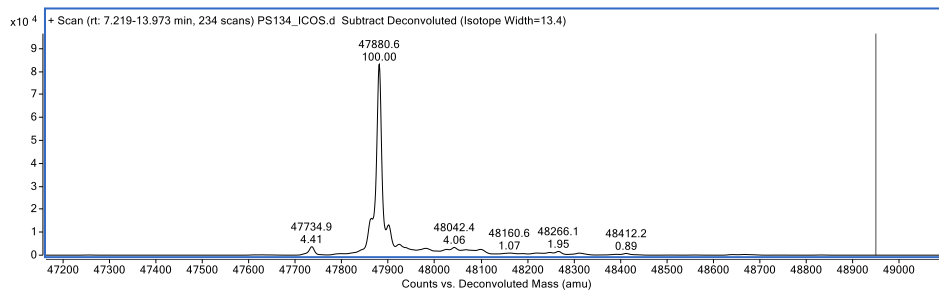

## 10.26. Fab<sub>HER2</sub> S21

Expected mass: 47638 Da. Observed mass: 47639 Da.

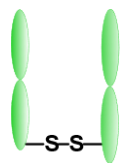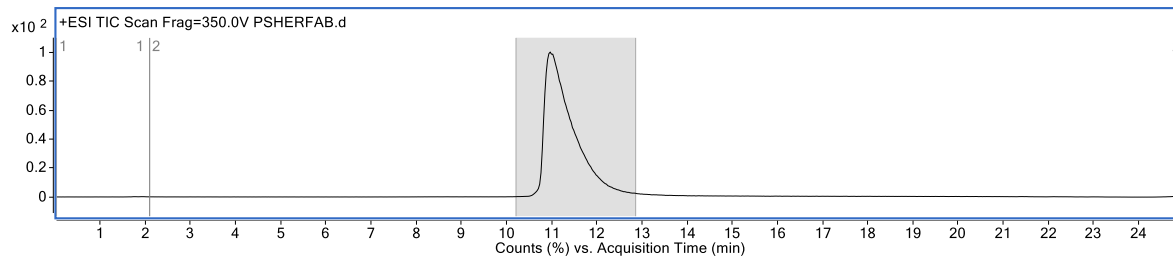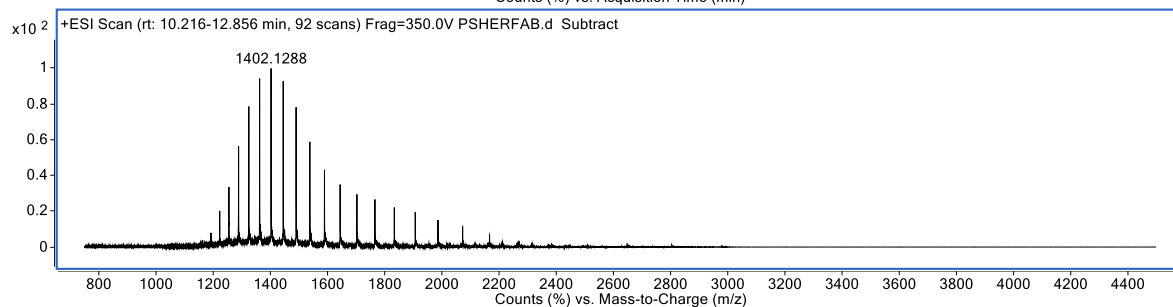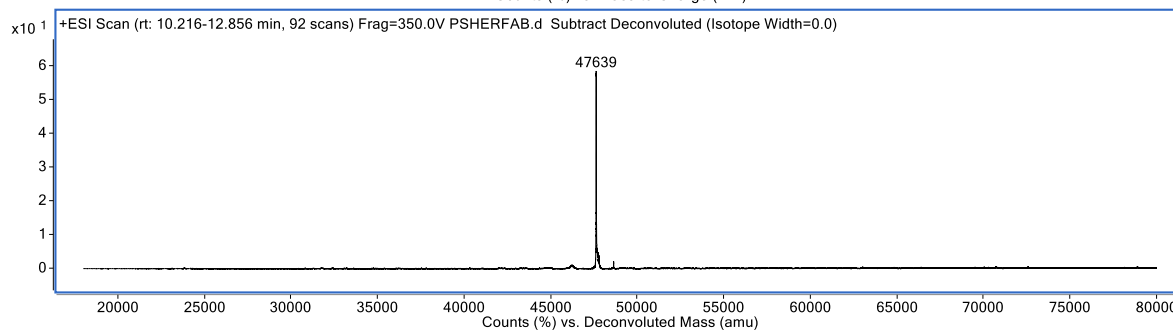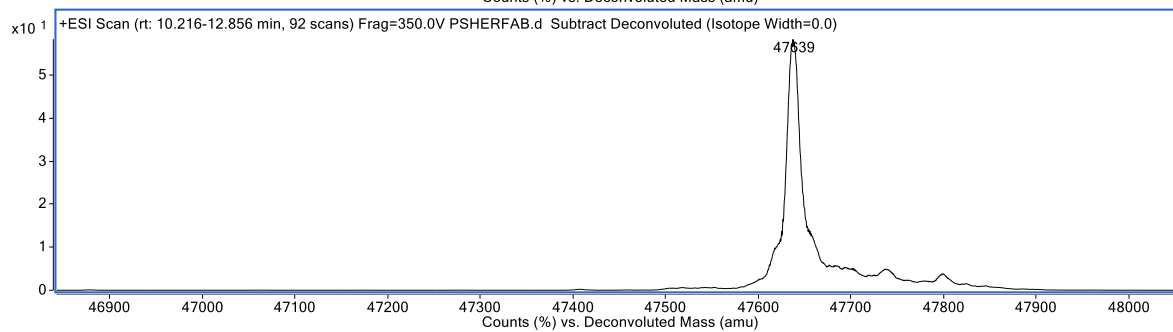

## 10.27. Fab<sub>CD20</sub> S22

Expected mass: 47181 Da. Observed mass: 47180 Da.

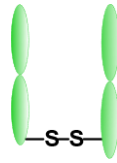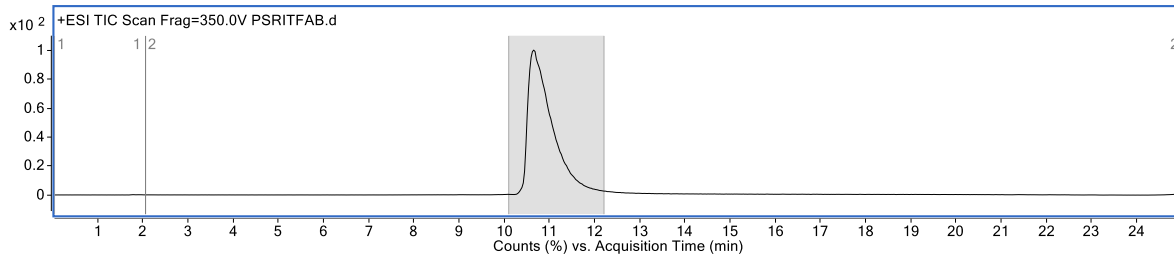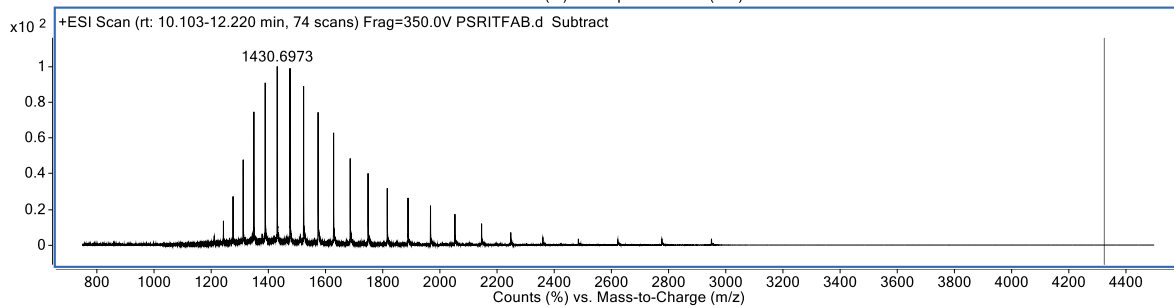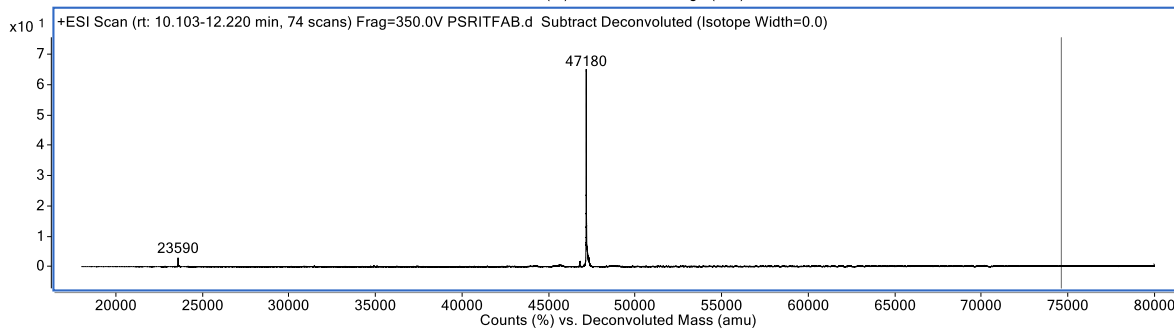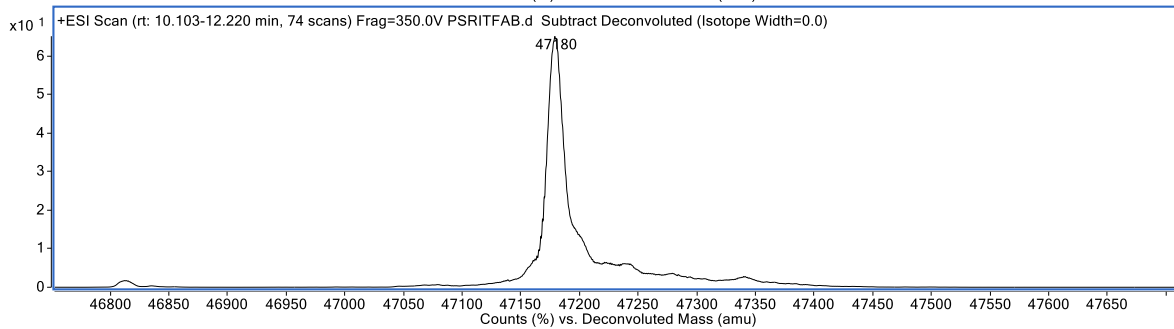

## 10.28. Fab<sub>EGFR</sub>-Tet S24

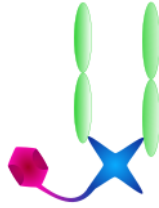

Expected mass: 50481.4 Da, 50628.5 Da.

Observed mass: 50481.9 Da, 50627.2 Da.

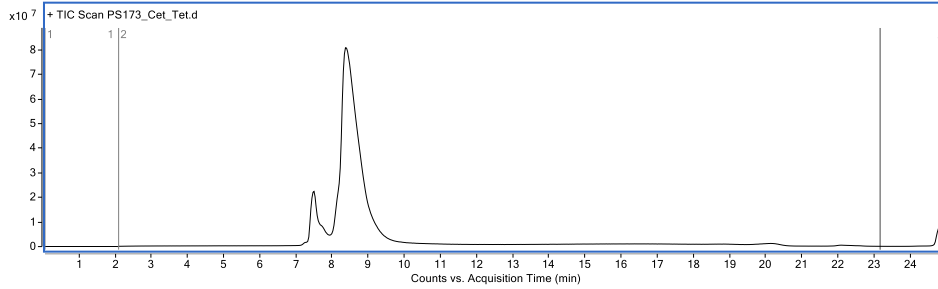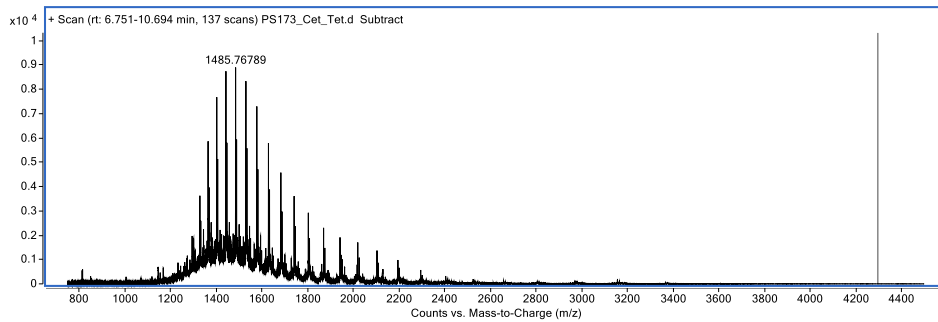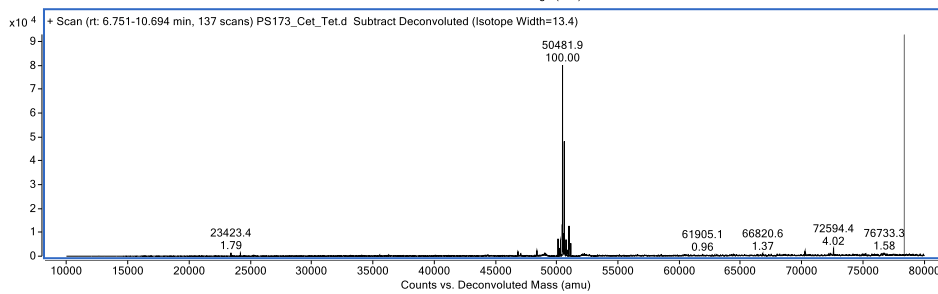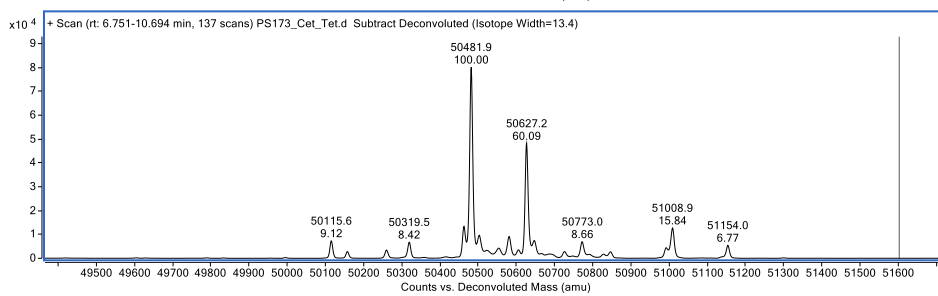

## 10.29. Fab<sub>CD20</sub>-BCN S25

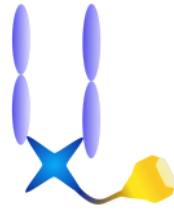

Expected mass: 47683.0 Da.

Observed mass: 47682.0 Da.

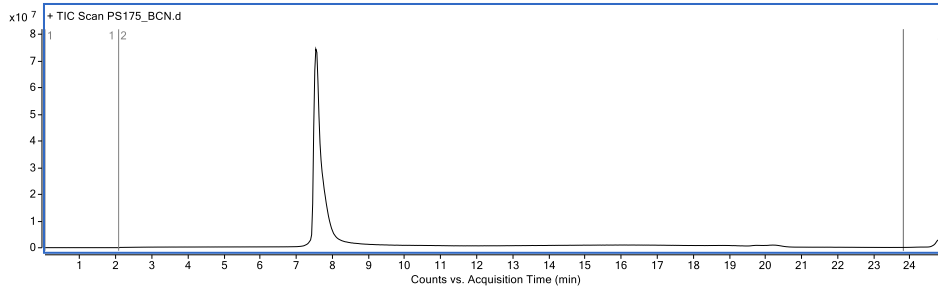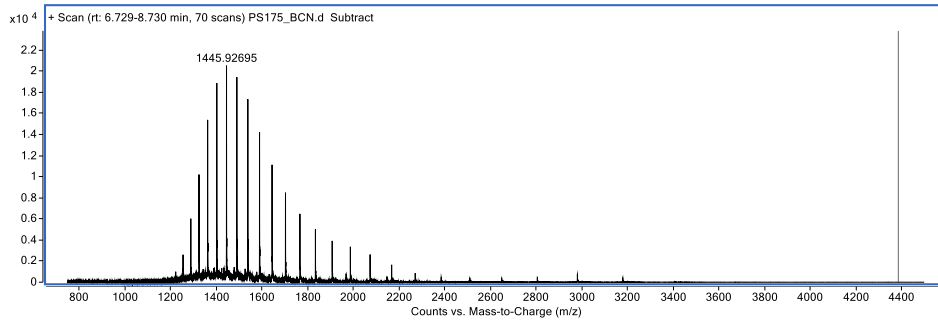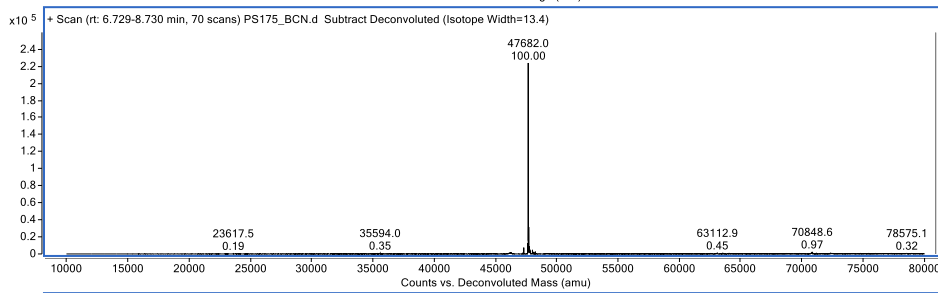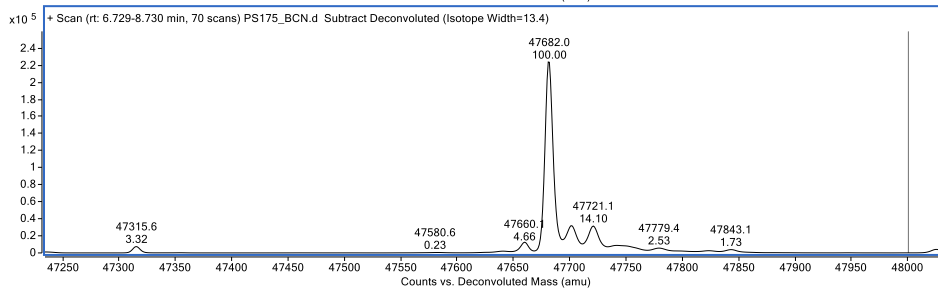

## 10.30. Fab<sub>HER2</sub>-Tet S26

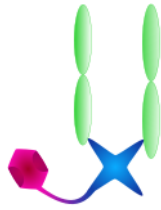

Expected mass: 48334 Da.

Observed mass: 48321 Da (as expected as MS was mis-calibrated by 14 Da, showing native Fab<sub>HER2</sub> at 47625 Da).

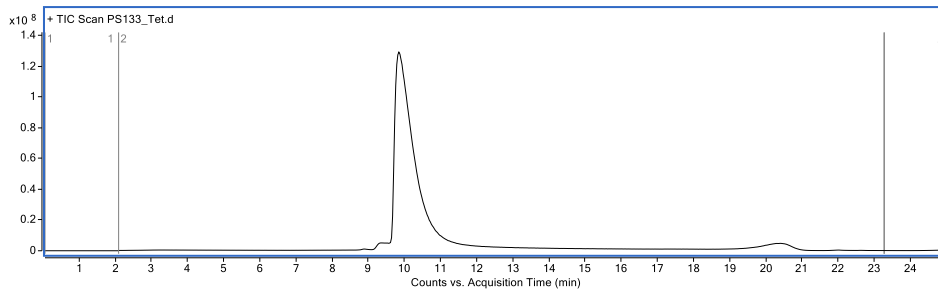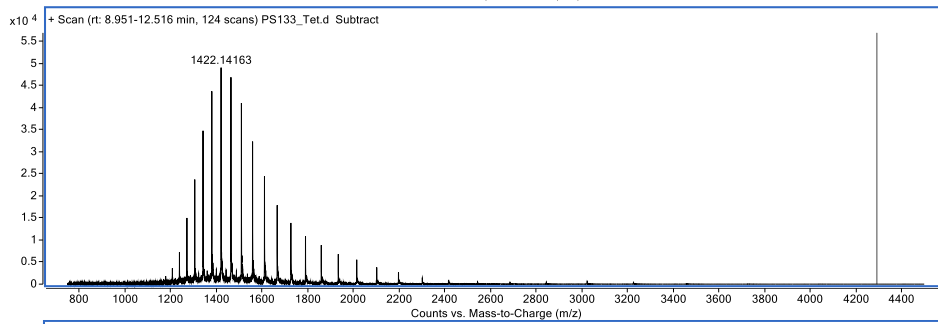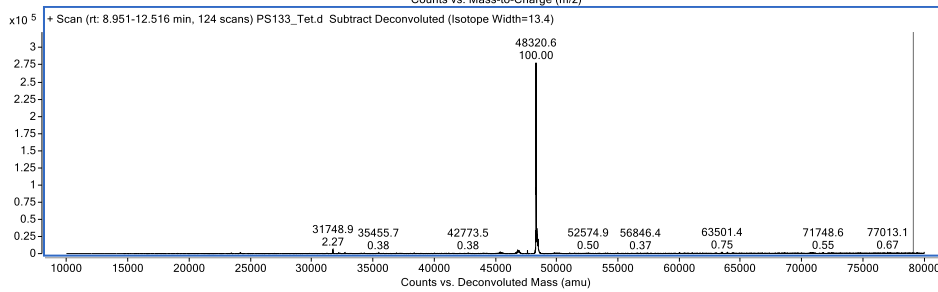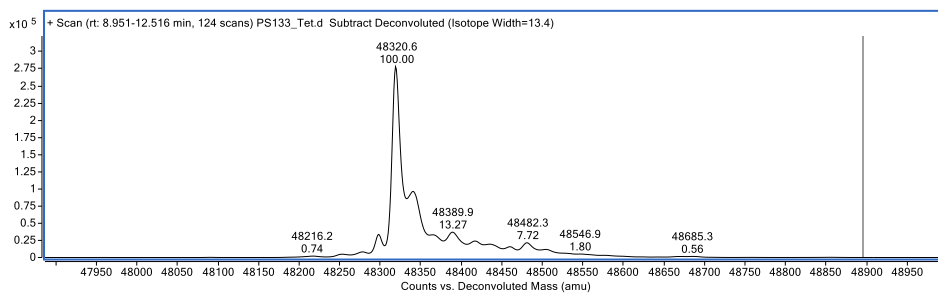

### 10.31. Sia-BCN S28

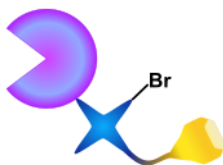

Expected mass: 46578 Da. Observed: 46578 Da.

Other mass envelope (including peak at  $m/z$ : 551.4) due to PEG impurity from Zeba spin purification.

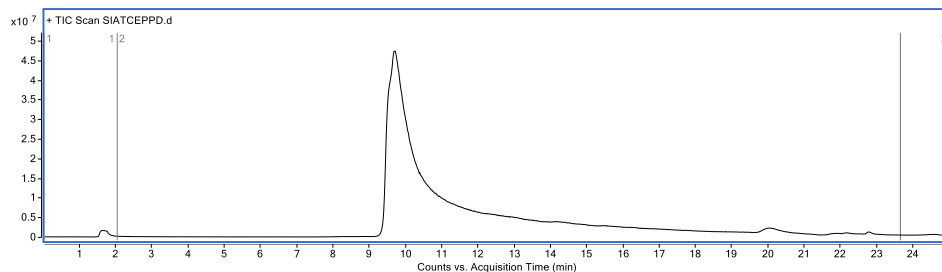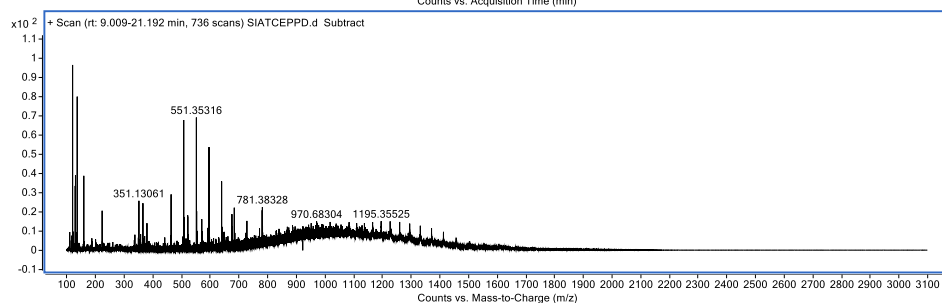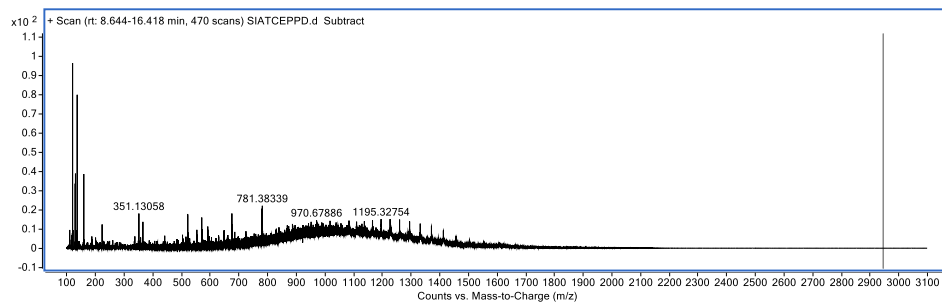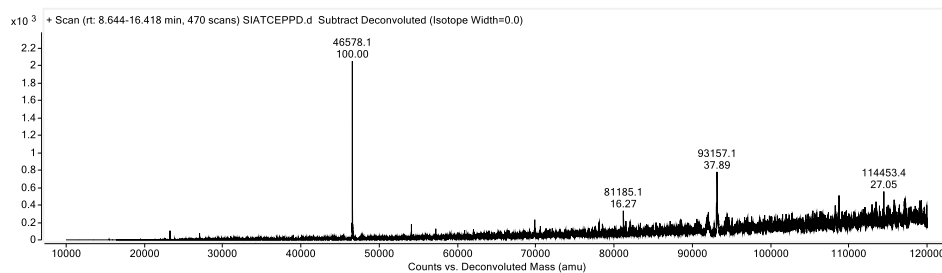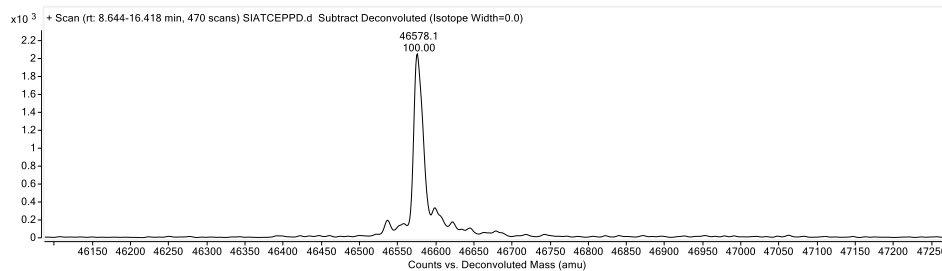

## 10.32. Fab<sub>CD3</sub>-BCN S30

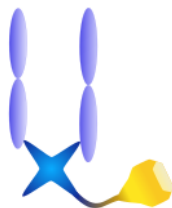

Expected mass: 47948 Da. Observed: 47951 Da.

Mass of 48062 Da probably arising from under digestion of Fab<sub>CD3</sub>. Mass difference of ~111 Da could correspond to one more leucine or isoleucine residue (mass: 113 Da).

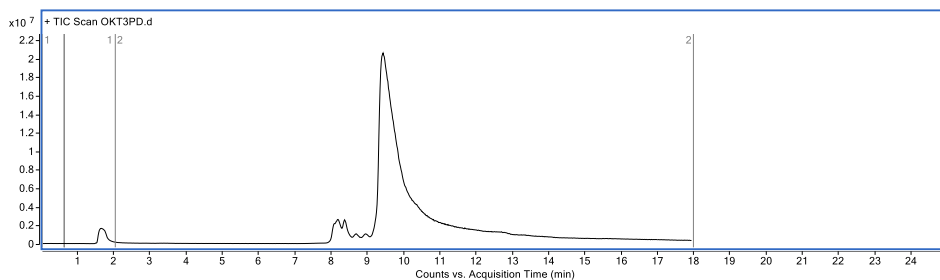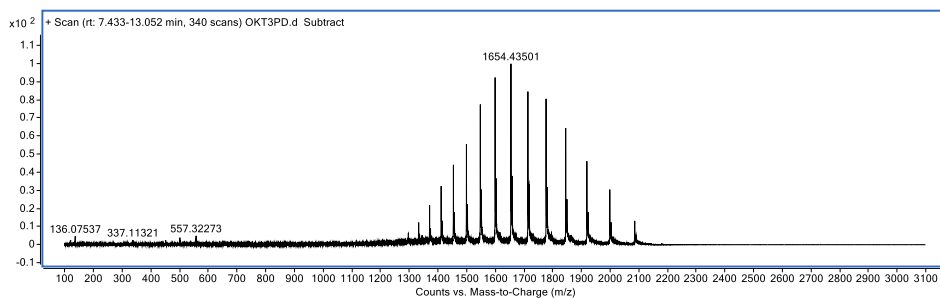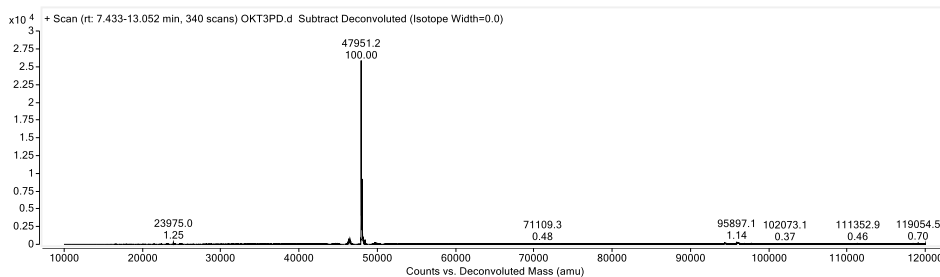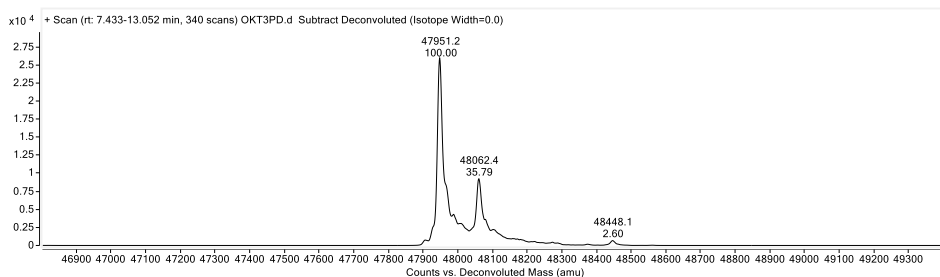



### 10.33. Fab<sub>HER2</sub>-Fab<sub>CD20</sub>-PDBr<sub>2</sub> S32

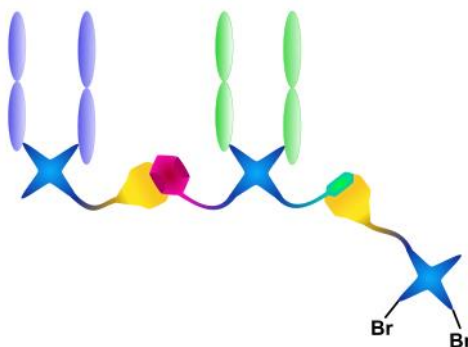

Expected mass: 96888 Da. Observed: 96870 Da.

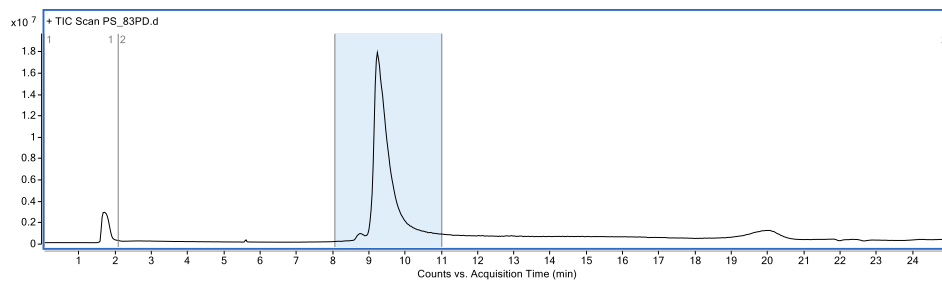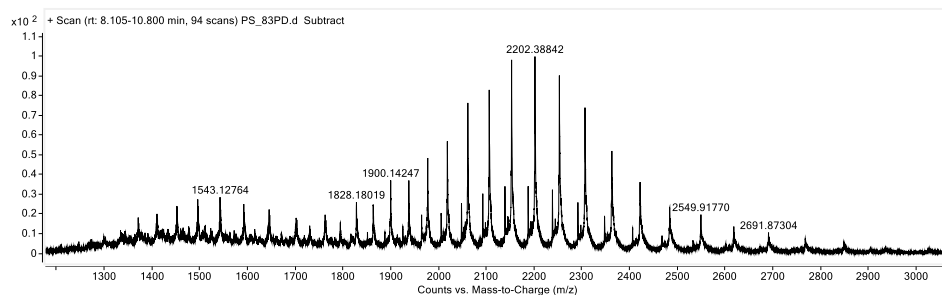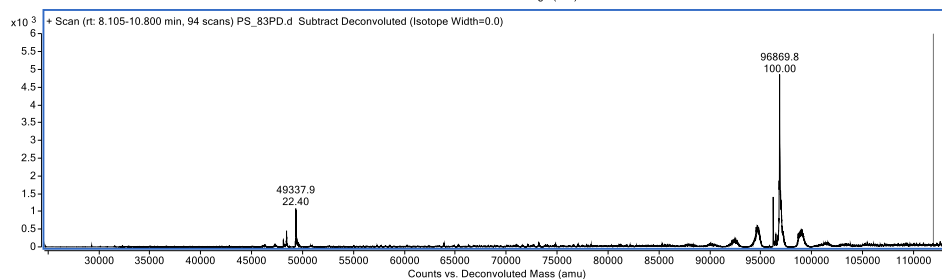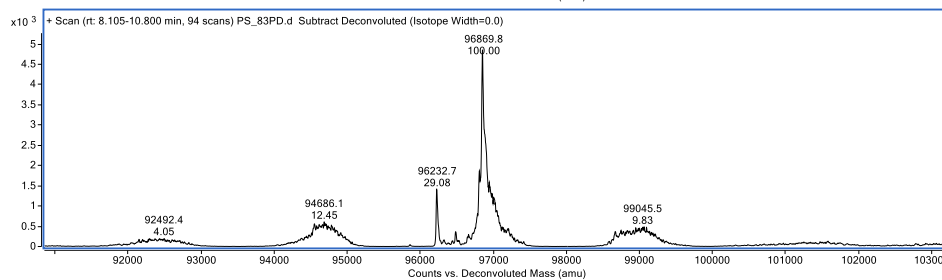

### 10.34. Fab<sub>HER2</sub>-Fab<sub>CD20</sub>-Fab<sub>EGFR</sub> S33

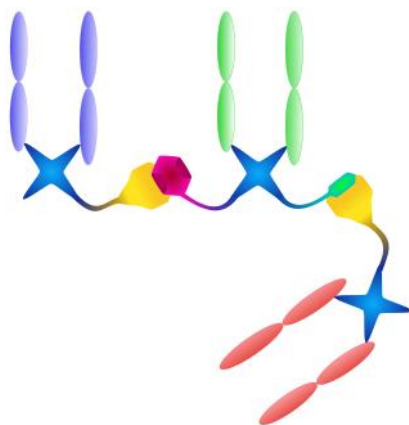

Expected mass: 146512 and 146659 Da. Observed: 146530 and 146677 Da.

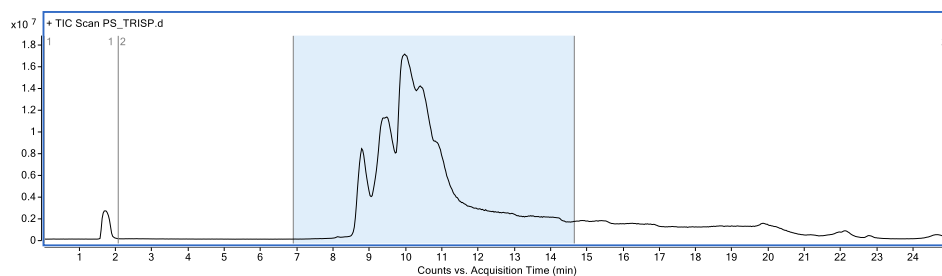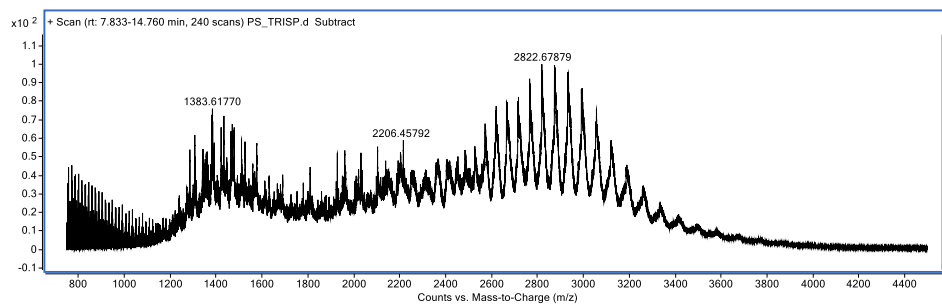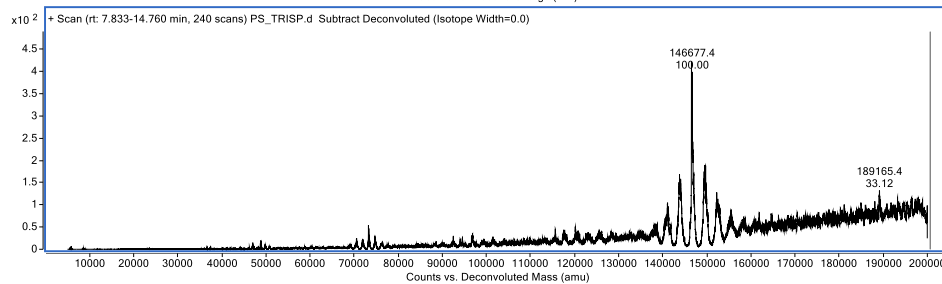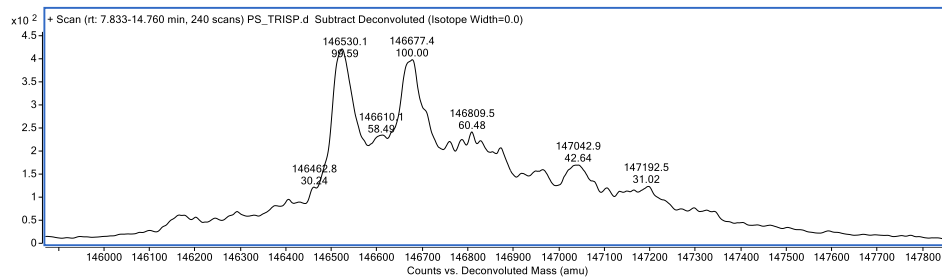

### 10.35. Fab<sub>CD20</sub>-Fab<sub>HER2</sub>-PDBr<sub>2</sub> S34



Expected mass: 96891 Da.

Observed mass: 96894 Da.

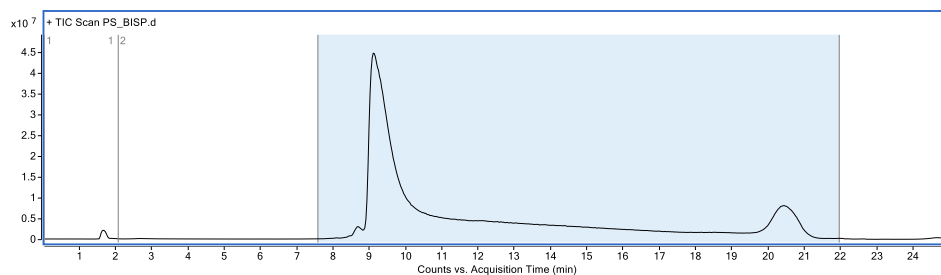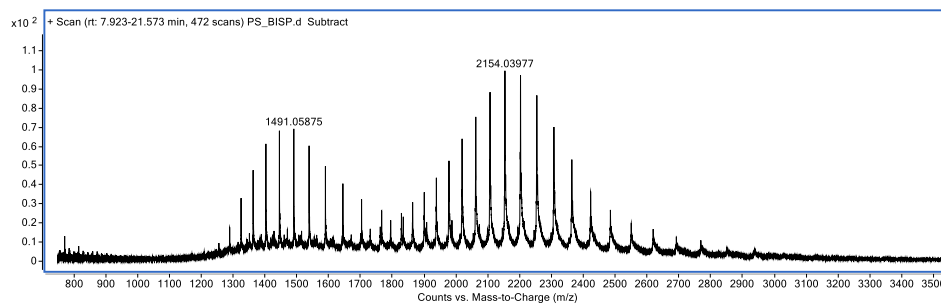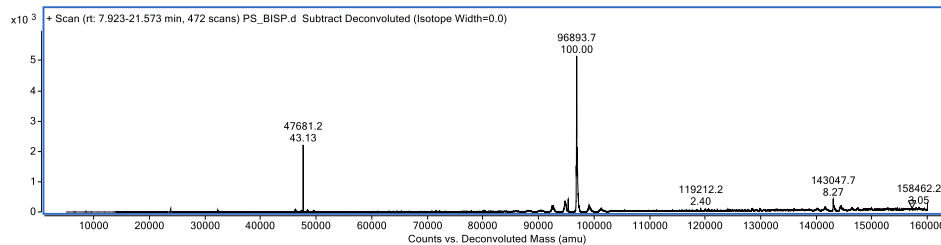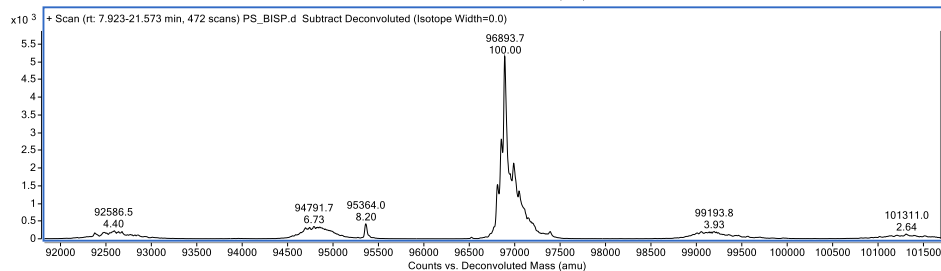

### 10.36. Fab<sub>CD20</sub>-Fab<sub>HER2</sub>-PDBr S35

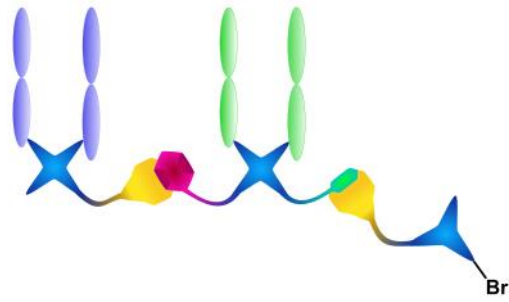

Expected mass: 96812.5 Da.

Observed mass: 96995.7 Da (+183.2 Da, +TCEP oxidized?), 96749.4 Da (-63.1 Da).

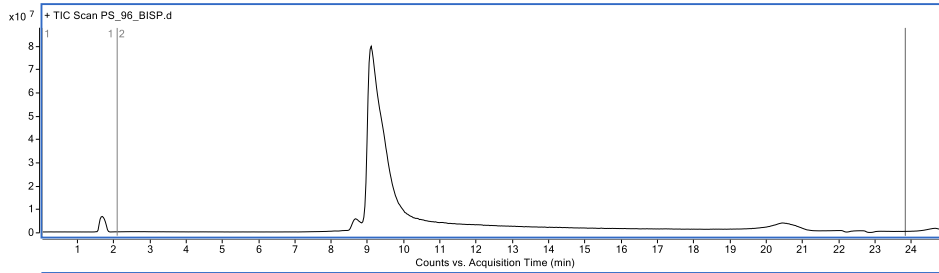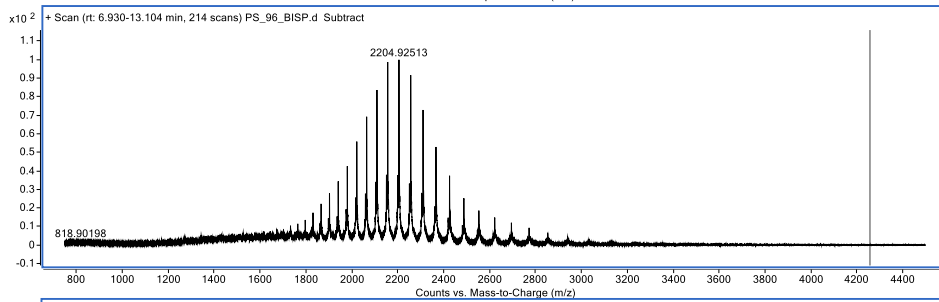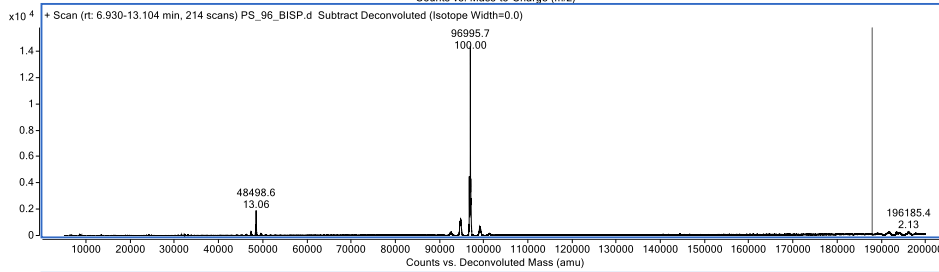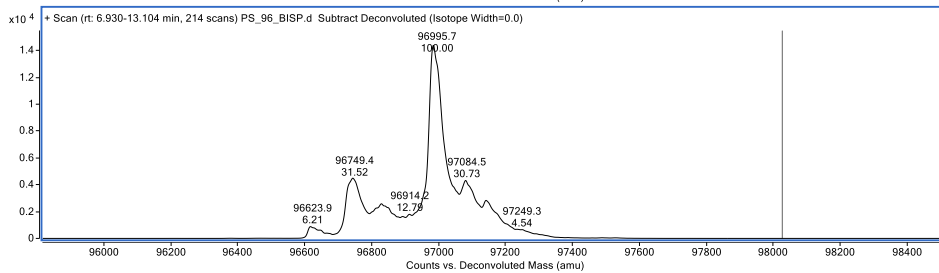

### 10.37. Fab<sub>CD20</sub>-Fab<sub>HER2</sub>-Sia<sub>2</sub> S36

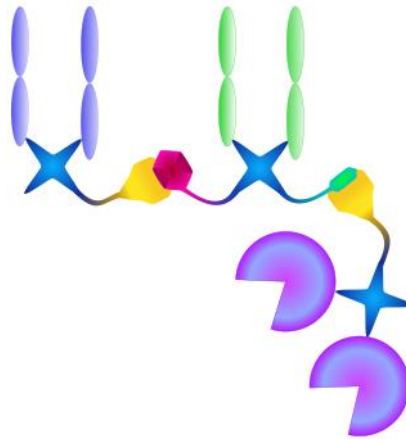

Expected mass: 188720 Da.

Observed mass: 188753 Da.

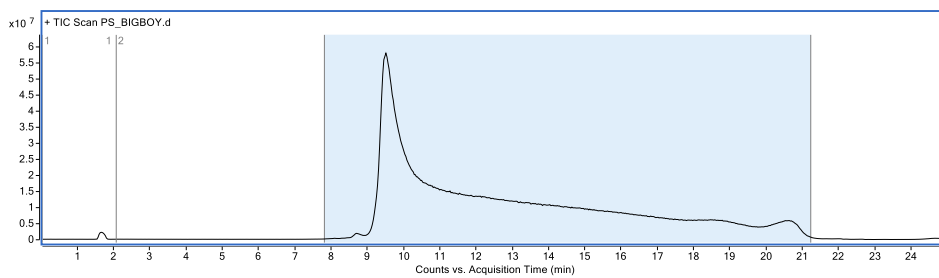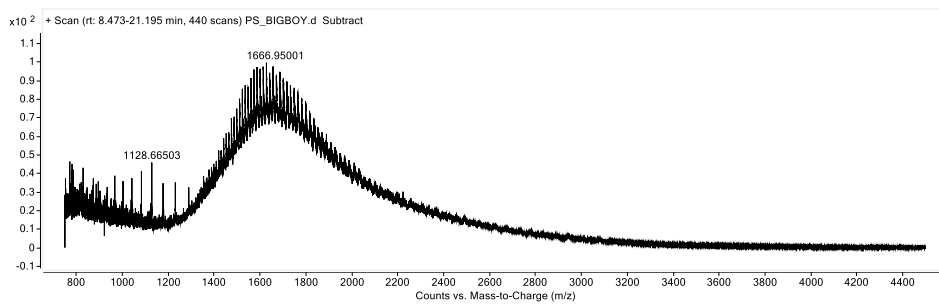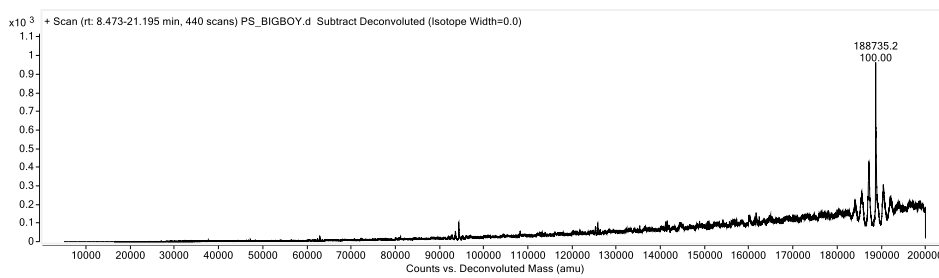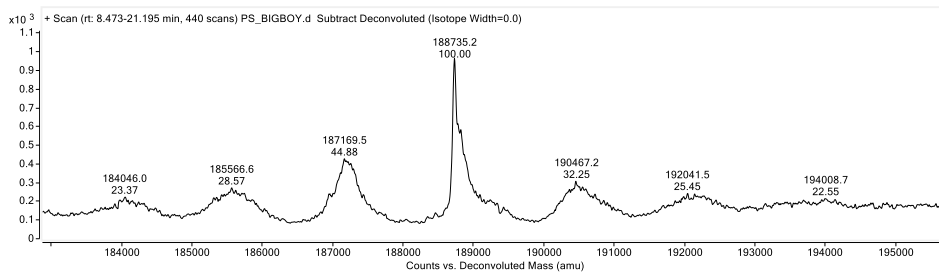

### 10.38. Fab<sub>CD20</sub>-Fab<sub>HER2</sub>-Sia S37

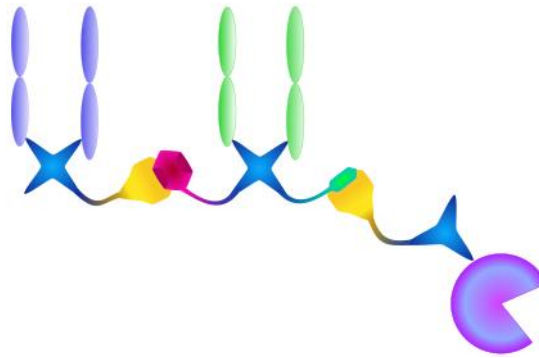

Expected mass: 142725 Da. Observed: 142750 Da.

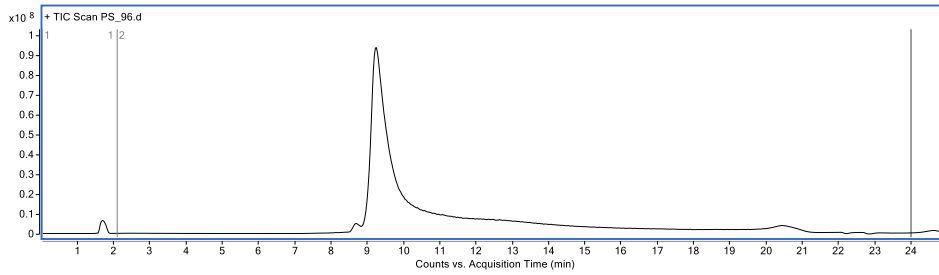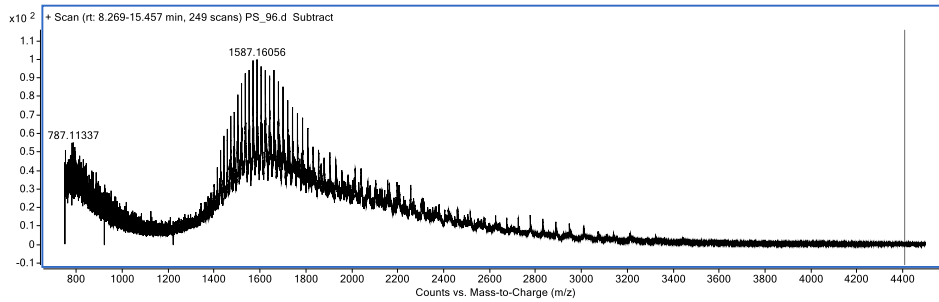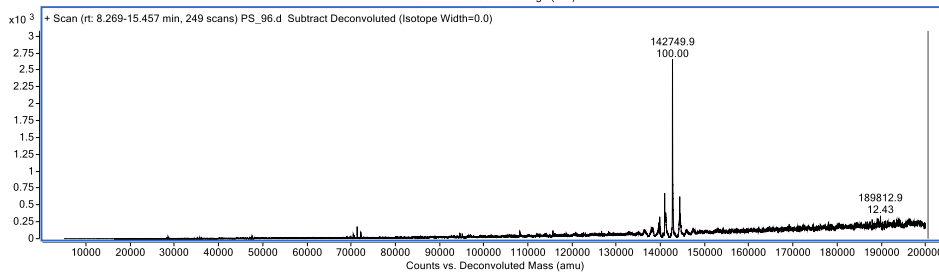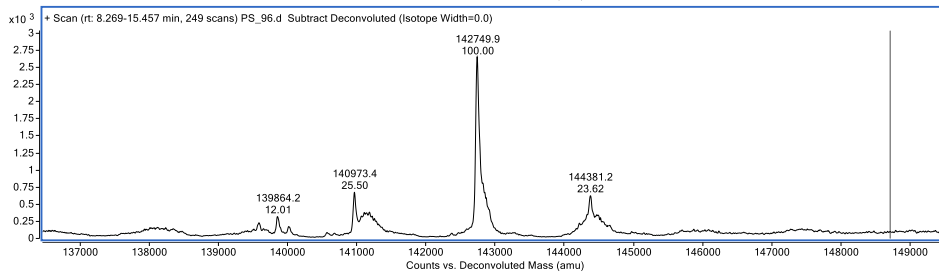

## 11. References

---

1. Maruani, A. *et al.* A plug-and-play approach to antibody-based therapeutics via a chemoselective dual click strategy. *Nat. Commun.* **6**, 6645 (2015).
2. Bahou, C. *et al.* Highly homogeneous antibody modification through optimisation of the synthesis and conjugation of functionalised dibromopyridazinediones. *Org. Biomol. Chem.* **16**, 1359–1366 (2018).
3. Bahou, C. *et al.* A Plug-and-Play Platform for the Formation of Trifunctional Cysteine Bioconjugates that also Offers Control over Thiol Cleavability. *Bioconjugate Chem.* **32**, 672–679 (2021).
4. Nogueira, J. C. F. *et al.* Oriented attachment of VNAR proteins,,: Via site-selective modification, on PLGA-PEG nanoparticles enhances nanoconjugate performance. *Chem. Commun.* **55**, 7671–7674 (2019).
5. Slaga, D. *et al.* Avidity-based binding to HER2 results in selective killing of HER2-overexpressing cells by anti-HER2/CD3. *Sci. Transl. Med.* **10**, 5775 (2018).
6. Gray, M. A. *et al.* Targeted glycan degradation potentiates the anticancer immune response in vivo. *Nat. Chem. Biol.* **16**, 1376–1384 (2020).
7. Edgar, L. J. *et al.* Sialic Acid Ligands of CD28 Suppress Costimulation of T Cells. *ACS Cent. Sci.* **7**, 1508–1515 (2021).
8. Herrmann, M. *et al.* Bifunctional PD-1 3 aCD3 3 aCD33 fusion protein reverses adaptive immune escape in acute myeloid leukemia. *Blood* **132**, 2484–2494 (2018).
9. Lang, K. *et al.* Genetic encoding of bicyclononynes and trans-cyclooctenes for site-specific protein labeling in vitro and in live mammalian cells via rapid fluorogenic diels-alder reactions. *J. Am. Chem. Soc.* **134**, 10317–10320 (2012).
10. Agramunt, J., Ginesi, R., Pedroso, E. & Grandas, A. Inverse Electron-Demand Diels-Alder Bioconjugation Reactions Using 7-Oxanorbornenes as Dienophiles. *J. Org. Chem.* **85**, 6593–6604 (2020).
11. Hernández-Gil, J. *et al.* Development of <sup>68</sup>Ga-labelled ultrasound microbubbles for whole-body PET imaging. *Chem. Sci.* **10**, 5603–5615 (2019).
12. Maruani, A. *et al.* A Plug-and-Play Approach for the de Novo Generation of Dually Functionalized Bispecifics. *Bioconjugate Chem.* **31**, 520–529 (2020).
13. Rasmussen, L. K. Facile synthesis of mono-, di-, and trisubstituted alpha-unbranched hydrazines. *J. Org. Chem.* **71**, 3627–3629 (2006).
14. Zhao, Y. *et al.* Two routes for production and purification of Fab fragments in biopharmaceutical discovery research: Papain digestion of mAb and transient expression in mammalian cells. *Protein Expr. Purif.* **67**, 182–189 (2009).
15. Moore, H. M. *et al.* Biospecimen reporting for improved study quality (BRISQ). *Cancer Cytopathol.* **119**, 92–102 (2011).
